# Supplementary material for: Common genetic variations in telomere length genes and lung cancer: a Mendelian randomisation study and its novel application in lung tumour transcriptome
Source: eLife. 2023 Apr 20;12:e83118. doi: 10.7554/eLife.83118 (PMC10118386; doi:10.7554/eLife.83118)
Supplement: Supplementary file 1. — (a) SNPs selected as leukocyte telomere length (LTL) instrument for the Mendelian randomisation (MR) analyses. (b) MR analyses across methods for the 144 LTL SNPs. (c) Test for directional pleiotropy using MR Egger for the 144 LTL SNPs. (d) Heterogeneity tests for the 144 LTL SNPs. (e) Leave-one out analyses for the 144 LTL SNPs. (f) Multivariable MR analyses. (g) Multivariable MR analyses for LTL and lung cancer adjusting for obesity- and alcohol-related traits. (h) Summary of the colocalisation results for the LTL instrument based on 144 variants. (i) Summary of the multi-trait colocalisation results for the 12 colocalised genetic loci. (j) Top 500 genes positively correlated with the first five principal components. (k) Top 500 genes negatively correlated with the first five principal components. (l) Pathway analysis on the top 500 genes positively and negatively correlated with the first five principal components based on RNA-seq data of 343 ADE cases from The Cancer Genome Atlas (TCGA) dataset using Gene Set Enrichment Analysis (GSEA). (m) Association of LTL polygenic risk score (PRS) with the clinical and molecular features of lung adenocarcinoma tumours. [file elife-83118-supp1.xlsx]

## Sheet: supplementary file 1a
supplementary file 1a. SNPs selected as leukocyte telomere length instrument for the Mendelian Randomization analyses
Rsid	Chr	Pos (hg37)	A1	A2	Beta	SE	P-value	a1_freq	N_imp
rs2977608	1	768253	A	C	-0.0129483	0.00233716	3e-08	0.256051	461874
rs66731853	1	20916238	G	A	0.0177791	0.00215421	1.5e-16	0.682696	463432
rs17185038	1	28219658	C	G	0.0257788	0.00405796	2.1e-10	0.93539	464716
rs76374777	1	28768043	G	C	-0.0487474	0.00799278	1.1e-09	0.984213	464716
rs6669563	1	32279629	G	A	-0.0182358	0.00202476	2.1e-19	0.562232	464716
rs3768321	1	40035928	G	T	0.0155758	0.00255692	1.1e-09	0.810305	463174
rs4660456	1	41239511	A	G	-0.0141182	0.00237603	2.8e-09	0.770446	464716
rs41269079	1	45252015	T	A	-0.0153617	0.0025499	1.7e-09	0.811009	464215
rs139795227	1	92842367	A	C	-0.0599379	0.00873247	6.7e-12	0.985979	437231
rs145114957	1	94322469	C	G	-0.0272605	0.00498872	4.6e-08	0.957352	463185
rs4498805	1	110910397	G	T	-0.0150601	0.00200376	5.7e-14	0.453368	464158
rs17464525	1	114443899	G	A	0.0324422	0.00259325	6.6e-36	0.819077	464716
rs11579626	1	146741960	A	C	-0.0265113	0.00357752	1.3e-13	0.915118	464433
rs61818036	1	151364199	G	A	0.0189441	0.00269589	2.1e-12	0.176391	461745
rs6659669	1	185315067	C	T	0.0117091	0.00205167	1.1e-08	0.394905	463788
rs932002	1	226577306	C	T	0.0402052	0.00279667	7.3e-47	0.849157	463856
rs2081601	2	17942230	G	T	-0.0194279	0.00320623	1.4e-09	0.889538	459369
rs6751209	2	43588302	T	C	0.0140465	0.00248465	1.6e-08	0.795769	463004
rs965109	2	54473046	C	T	0.101702	0.00648201	1.8e-55	0.975662	463583
rs12615793	2	54475914	G	A	-0.0451638	0.00287894	1.8e-55	0.859605	461573
rs12613375	2	58984109	C	T	-0.017801	0.00290685	9.1e-10	0.862288	461376
rs17803849	2	210673445	C	T	-0.0273203	0.00203482	4.2e-41	0.594839	464128
rs35671754	2	216220870	G	T	-0.0124744	0.00219884	1.4e-08	0.704253	462765
rs869785	3	24347800	T	C	0.0147303	0.00212801	4.4e-12	0.327529	463558
rs2230590	3	49936102	T	C	0.0158022	0.00200806	3.6e-15	0.489103	464716
rs13062095	3	101267385	T	C	-0.0138552	0.00214113	9.7e-11	0.672157	461757
rs6776756	3	128215821	G	A	0.0174439	0.00203747	1.1e-17	0.402438	463785
rs9878436	3	138244400	C	T	0.0143407	0.00201819	1.2e-12	0.565607	463394
rs139897613	3	169311210	G	C	0.0450415	0.00661892	1e-11	0.975624	443287
rs1881985	3	169373391	T	C	-0.0362485	0.00469069	1.1e-14	0.952292	461042
rs79127610	3	169389753	G	A	-0.0579976	0.00678851	1.3e-17	0.97796	464716
rs12638862	3	169477506	A	G	0.0861226	0.00227875	<1e-304	0.739227	463092
rs146546514	3	169553070	C	A	-0.0803539	0.00826114	2.3e-22	0.983095	406684
rs75544730	3	169803757	T	C	-0.0300003	0.00415547	5.2e-13	0.93505	440446
rs112394943	3	197842892	T	C	0.0198961	0.00281641	1.6e-12	0.837259	428896
rs2282764	4	2255063	A	G	0.0224234	0.00289392	9.3e-15	0.857616	462937
rs871134	4	7044380	C	T	0.0182986	0.0020263	1.7e-19	0.430968	462176
rs13129697	4	9926967	T	G	-0.0172326	0.00224134	1.5e-14	0.720832	464716
rs4695407	4	48843372	A	G	-0.0141511	0.00199925	1.5e-12	0.492157	463024
rs10024820	4	122781402	T	C	0.0144438	0.00205573	2.1e-12	0.610765	464076
rs11746381	5	76284	T	C	-0.0329955	0.00431036	1.9e-14	0.9432	464716
rs71593392	5	1203499	T	C	0.0124651	0.00227275	4.1e-08	0.717829	445314
rs7705526	5	1285974	C	A	-0.0776022	0.00216124	2.4e-282	0.673422	451006
rs115451758	5	1289277	G	A	0.0836644	0.0100171	6.7e-17	0.989626	449232
rs61748181	5	1294166	C	T	0.059181	0.00595394	2.8e-23	0.971072	463851
rs114719295	5	1354281	C	A	0.0678962	0.00918067	1.4e-13	0.986484	411300
rs6873104	5	78954121	A	T	0.0245329	0.00335421	2.6e-13	0.898716	463809
rs72801474	5	132444128	G	A	0.0207451	0.00352389	3.9e-09	0.911707	464716
rs80324517	6	204031	G	A	-0.0396515	0.00466286	1.8e-17	0.951741	464716
rs9398196	6	109601554	A	G	0.0143586	0.00201175	9.5e-13	0.47995	464629
rs13230646	7	23930316	T	C	0.0173277	0.00232377	8.9e-14	0.751055	458458
rs11769630	7	50257703	T	A	0.0256807	0.00389475	4.3e-11	0.927773	455587
rs2056726	7	99780283	G	A	0.0228078	0.00243638	7.9e-21	0.785624	464552
rs7790856	7	124459852	C	T	0.0437199	0.00220526	1.8e-87	0.710861	464345
rs117630647	7	124779510	G	A	-0.059565	0.00720413	1.4e-16	0.978654	425781
rs3757387	7	128576086	T	C	0.0202729	0.00201498	8.2e-24	0.552878	463691
rs117469989	7	158410679	T	G	0.0279094	0.00499329	2.3e-08	0.957315	453693
rs1985369	7	159119220	A	G	0.0311893	0.00300952	3.6e-25	0.131822	445833
rs762679	8	48885436	T	A	-0.0310104	0.00285024	1.4e-27	0.143499	464716
rs10808899	8	56667645	G	C	0.030141	0.00318664	3.1e-21	0.110687	464411
rs7012816	8	70964743	G	A	-0.0175855	0.00296549	3e-09	0.870003	464716
rs10112752	8	73958718	G	A	0.0287522	0.00202518	9.5e-46	0.569631	462003
rs1023767	8	95530969	G	A	0.0183732	0.00234772	5e-15	0.762405	464716
rs11557154	9	34107505	C	T	0.0343719	0.00298538	1.1e-30	0.86997	464716
rs4743037	9	109639970	C	T	-0.0147971	0.00238094	5.1e-10	0.769126	462541
rs10905255	10	5870267	G	T	0.0182493	0.00203099	2.6e-19	0.42081	462184
rs12572897	10	96114835	G	A	0.0321488	0.0029776	3.6e-27	0.869908	464716
rs12412214	10	101276256	G	A	0.0245174	0.00222685	3.4e-28	0.720235	464600
rs11190184	10	101368199	G	C	0.017217	0.00222795	1.1e-14	0.71576	459786
rs4919611	10	103894939	C	A	0.0255935	0.00315632	5.1e-16	0.112898	464716
rs9419958	10	105675946	T	C	0.0810098	0.00293847	2.6e-167	0.13861	463885
rs139122544	10	105677920	G	C	0.0476108	0.00696321	8.1e-12	0.976436	414167
rs6584607	10	106277315	C	A	-0.042282	0.00745251	1.4e-08	0.980949	462477
rs939916	11	202253	G	A	-0.0241795	0.00216724	6.6e-29	0.330033	458773
rs1609812	11	5247141	G	A	-0.046609	0.00273479	3.9e-65	0.160214	464716
rs10840270	11	9629553	C	G	-0.014383	0.00212494	1.3e-11	0.344316	460657
rs2293579	11	47440758	G	A	0.012915	0.00205481	3.3e-10	0.613726	464716
rs611646	11	108177097	T	A	0.0368309	0.00203547	3.5e-73	0.591315	464305
rs7101497	11	108266855	C	T	0.0175626	0.00234197	6.4e-14	0.760919	463344
rs6590343	11	128500215	A	G	-0.0121739	0.00201444	1.5e-09	0.483615	463852
rs10845387	12	11757743	G	A	0.0141214	0.00209396	1.5e-11	0.647334	464716
rs12369950	12	24762109	T	C	0.0178308	0.00290205	8e-10	0.859325	462282
rs17445108	12	57082058	G	A	0.0168922	0.00300983	2e-08	0.87305	464716
rs1907702	12	88955469	G	A	-0.0150247	0.00242651	5.9e-10	0.233229	462976
rs76666449	12	120904895	T	C	-0.0295125	0.00333186	8.2e-19	0.899375	461128
rs10773176	12	122944713	A	G	0.0172009	0.00228534	5.2e-14	0.258786	463882
rs1727302	12	123632930	G	A	-0.0198433	0.00230889	8.4e-18	0.259019	464716
rs1332941	13	41695100	A	G	-0.0256552	0.00273159	5.9e-21	0.179534	460016
rs9600019	13	73317585	C	T	-0.0127134	0.00213096	2.4e-09	0.664421	462407
rs3093888	14	20812951	G	A	0.028973	0.00452459	1.5e-10	0.94869	463795
rs73581419	14	21941148	C	T	-0.0229838	0.00324156	1.3e-12	0.893395	462410
rs10150625	14	23483522	C	T	0.0215519	0.00379231	1.3e-08	0.923539	458600
rs17677991	15	42032383	C	G	-0.0222664	0.00210806	4.4e-26	0.657877	464716
rs10851590	15	55989939	C	T	0.0111704	0.00202818	3.6e-08	0.502179	463310
rs1980240	15	56774018	A	C	-0.0129625	0.0020416	2.2e-10	0.594757	462804
rs75683534	15	65116390	C	A	-0.0447257	0.00761929	4.4e-09	0.981214	432494
rs5742915	15	74336633	T	C	-0.0193377	0.00202886	1.6e-21	0.554171	464716
rs11646283	16	9073060	T	C	-0.0153447	0.00203937	5.3e-14	0.589297	461847
rs8051249	16	14545264	T	C	-0.0159727	0.00285075	2.1e-08	0.855867	463941
rs182059586	16	14652220	T	C	0.0571159	0.00680853	4.9e-17	0.97489	408252
rs8053839	16	48390512	G	T	0.0139207	0.00204649	1e-11	0.458038	457145
rs76219171	16	50188929	G	A	-0.0359839	0.00431741	7.8e-17	0.941567	450771
rs28711261	16	67617186	A	G	-0.0167394	0.00296273	1.6e-08	0.867449	462841
rs34003787	16	73071381	C	T	0.0240518	0.00358352	1.9e-11	0.912293	449493
rs183553155	16	74491239	G	A	-0.0707848	0.0101527	3.1e-12	0.989437	428219
rs11866592	16	74654396	G	A	-0.03464	0.00286611	1.3e-33	0.85802	464397
rs2303262	16	82203758	C	T	0.0469485	0.00239917	2.9e-85	0.222887	464716
rs7218033	17	1694247	C	T	0.022657	0.00230923	1e-22	0.746597	460449
rs4362428	17	2090341	C	A	0.0116276	0.00205082	1.4e-08	0.600132	463859
rs113800756	17	2456432	A	C	0.0165577	0.00292448	1.5e-08	0.86285	457237
rs4724	17	7760397	G	A	0.0547446	0.00312441	9.8e-69	0.883402	464716
rs75664430	17	8064779	C	G	0.0235179	0.0023186	3.6e-24	0.751972	462922
rs111527438	17	29252703	T	C	-0.0125	0.00211016	3.1e-09	0.648749	462353
rs12941945	17	41448228	A	G	0.0261033	0.00269093	3e-22	0.832437	458692
rs7209057	17	65705530	G	A	-0.011819	0.00202865	5.7e-09	0.438956	459652
rs2069536	17	74001106	A	G	0.0147561	0.00231358	1.8e-10	0.249795	463298
rs144204502	17	76183233	C	T	0.100574	0.00913369	3.4e-28	0.987438	447012
rs112625468	17	76192318	C	T	-0.0161121	0.00205046	3.9e-15	0.564303	450361
rs3891167	18	658423	A	G	0.0425685	0.00239551	1.2e-70	0.746565	427300
rs76883411	18	709293	G	C	0.040101	0.00649832	6.8e-10	0.975612	460485
rs117962821	18	841958	C	T	0.0620526	0.00814698	2.6e-14	0.983235	423615
rs8088824	18	42151261	C	T	-0.0257674	0.00235716	8.1e-28	0.236812	462570
rs2276182	18	51798047	C	G	-0.0233529	0.00204247	2.8e-30	0.596773	464368
rs6565924	18	74691225	A	G	-0.0131327	0.00208399	2.9e-10	0.638554	461318
rs11085072	19	4368142	C	T	0.0131806	0.00236713	2.6e-08	0.763091	459335
rs8105767	19	22215441	A	G	-0.0328384	0.00220117	2.5e-50	0.70533	461895
rs4530278	19	33752994	G	T	-0.0138793	0.0020567	1.5e-11	0.40185	457460
rs429358	19	45411941	T	C	-0.0173498	0.00277091	3.8e-10	0.846031	464716
rs8102497	19	57370055	G	A	0.0149654	0.0020233	1.4e-13	0.568172	461792
rs6054257	20	66370	G	A	0.0141684	0.00247729	1.1e-08	0.206478	460989
rs1291143	20	35525640	A	C	-0.0493145	0.0027991	1.8e-69	0.150974	463481
rs62207005	20	62251796	C	G	-0.0354412	0.00339324	1.6e-25	0.89999	446312
rs2738775	20	62269839	T	C	-0.0381594	0.00566569	1.6e-11	0.0340961	457353
rs35902944	20	62308395	G	C	-0.0633999	0.00240976	1.5e-152	0.752899	429899
rs35640778	20	62321128	G	A	0.209011	0.00702087	9.6e-195	0.979243	464716
rs117238689	20	62324404	C	T	0.0581779	0.0058513	2.7e-23	0.965399	404649
rs115610405	20	62325833	C	A	0.10951	0.00733009	1.8e-50	0.981137	464716
rs145170152	20	62359630	C	T	-0.035159	0.00527399	2.6e-11	0.962659	463593
rs41304832	20	62375508	G	A	-0.0611702	0.0093095	5e-11	0.987622	438223
rs138420497	20	62403641	G	T	0.0380289	0.00595821	1.7e-10	0.968471	425997
rs80150989	20	62627340	A	T	-0.027938	0.00463796	1.7e-09	0.949755	450024
rs28502153	22	17469049	C	A	0.0215916	0.00206208	1.2e-25	0.622042	464716
rs6007020	22	45790132	T	C	-0.0144904	0.00209637	4.8e-12	0.632177	462483
rs1003322	22	51072289	C	A	-0.0141734	0.00247546	1e-08	0.786258	450789
A1=effective allele; A2=reference allele; SE=beta standard error; a1_freq=frequency of A1; Estimates for European ancestry dataset;
N_imp=sample size multiplied by the imputation quality to indicate approximate sample size for the test. All estimates derived from LTL GWAs from Codd et al.

## Sheet: supplementary file 1b
supplementary file 1b. Mendelian randomization analyses across methods for the 144 leukocyte telomere length SNPs
Exposure	Outcome	Method	N SNPs	P	OR	LCI	UCI
Leukockyte Telomere Length	Lung Cancer	Inverse variance weighted	144	9.9136e-15	1.62321	1.43584	1.83504
		Weighted median		1.22186e-07	1.5705	1.32864	1.85638
		MR Egger		3.36711e-13	2.35421	1.91022	2.90139
		Contamination Mixture		6.63764e-08	1.58407	1.37713	1.82212
		MR-PRESSO Raw		1.642e-12	1.62321	1.43584	1.83504
		MR-PRESSO Outlier-corrected		1.20274e-10	1.50601	1.34192	1.69018
		MR-RAPS		8.3195e-14	1.58103	1.40187	1.78308
	Lung Adenocarcinoma	Inverse variance weighted	144	3.76406e-21	2.42962	2.02061	2.92143
		Weighted median		2.5798e-11	2.25522	1.77576	2.86414
		MR Egger		7.29787e-17	4.48168	3.28848	6.10784
		Contamination Mixture		1.85987e-08	2.2034	1.75067	2.77319
		MR-PRESSO Raw		9.73272e-17	2.42962	2.02061	2.92143
		MR-PRESSO Outlier-corrected		2.05903e-14	2.05354	1.74038	2.42305
		MR-RAPS		1.85598e-20	2.18221	1.85031	2.57365
	Lung Squamous Cell Carcinoma	Inverse variance weighted	143	0.986219	1.00155	0.84013	1.19398
		Weighted median		0.845241	1.0252	0.798506	1.31625
		MR Egger		0.614203	1.08498	0.790675	1.48883
		Contamination Mixture		0.6836	0.970446	0.778801	1.1275
		MR-PRESSO Raw		0.986243	1.00155	0.84013	1.19398
		MR-PRESSO Outlier-corrected		0.688669	0.967478	0.823273	1.13694
		MR-RAPS		0.743802	1.02998	0.862776	1.22958
	Lung Small Cell Carcinoma	Inverse variance weighted	143	0.346651	1.12822	0.877555	1.45049
		Weighted median		0.0465435	1.47296	1.00594	2.1568
		MR Egger		0.00306433	1.95462	1.26399	3.02261
		Contamination Mixture		0.0120543	1.73325	1.20925	2.33965
		MR-PRESSO Raw		0.348249	1.12822	0.877555	1.45049
		MR-PRESSO Outlier-corrected		NA	NA	NA	NA
		MR-RAPS		0.28163	1.15052	0.891335	1.48507
	Lung Ever Smokers	Inverse variance weighted	143	7.75248e-10	1.53786	1.34074	1.76395
		Weighted median		5.95595e-06	1.62388	1.31647	2.00306
		MR Egger		9.794e-10	2.1979	1.73671	2.78156
		Contamination Mixture		5.95926e-06	1.47698	1.24608	1.71601
		MR-PRESSO Raw		7.44107e-09	1.53786	1.34074	1.76395
		MR-PRESSO Outlier-corrected		1.66671e-07	1.44235	1.26617	1.64305
		MR-RAPS		1.71562e-08	1.49461	1.29975	1.71869
	Lung Never Smokers	Inverse variance weighted	143	3.77526e-05	2.02286	1.4469	2.82809
		Weighted median		2.61375e-05	2.89564	1.76404	4.75316
		MR Egger		2.07152e-10	6.84251	3.94772	11.86
		Contamination Mixture		0.0242383	5.87085	1.1275	8.93521
		MR-PRESSO Raw		6.38707e-05	2.02286	1.4469	2.82809
		MR-PRESSO Outlier-corrected		0.00257995	1.69347	1.20962	2.37086
		MR-RAPS		0.00090882	1.7636	1.2613	2.46593

## Sheet: supplementary file 1c
supplementary file 1c. Test for directional pleiotropy using MR Egger for the 144 leukocyte telomere length SNPs.
Exposure	Outcome	Intercept	SE	P
Leukocyte Telomere Length	Lung Cancer	-0.0124931	0.00297896	4.80551e-05
	Lung Adenocarcinoma	-0.0206223	0.00442035	7.04949e-06
	Lung Squamous Cell Carcinoma	-0.00269524	0.00451769	0.551733
	Lung Small Cell Carcinoma	-0.0185468	0.00621383	0.00334637
	Lung Ever Smokers	-0.0120032	0.00334731	0.000462136
	Lung Never Smokers	-0.0410797	0.00784121	5.76091e-07

## Sheet: supplementary file 1d
supplementary file 1d. Heterogeneity tests for the 144 leukocyte telomere length SNPs.
Exposure	Outcome	Method	Q	Q_df	Q_pval
Leukocyte Telomere length	Lung Cancer	MR Egger (Rucker’s Q)	224.431	142	1.25963e-05
	Lung Cancer	Inverse variance weighted (Cochran Q)	252.229	143	4.74614e-08
	Lung Adenocarcinoma	MR Egger (Rucker’s Q)	260.914	142	4.71911e-09
	Lung Adenocarcinoma	Inverse variance weighted (Cochran Q)	300.906	143	2.70788e-13
	Lung Squamous Cell Carcinoma	MR Egger (Rucker’s Q)	200.957	141	0.000686811
	Lung Squamous Cell Carcinoma	Inverse variance weighted (Cochran Q)	201.464	142	0.000767491
	Lung Small Cell Carcinoma	MR Egger (Rucker’s Q)	152.317	141	0.243162
	Lung Small Cell Carcinoma	Inverse variance weighted (Cochran Q)	161.941	142	0.120763
	Lung Ever Smokers	MR Egger (Rucker’s Q)	175.758	141	0.0250206
	Lung Ever Smokers	Inverse variance weighted (Cochran Q)	191.787	142	0.00341994
	Lung Never Smokers	MR Egger (Rucker’s Q)	172.959	141	0.0347747
	Lung Never Smokers	Inverse variance weighted (Cochran Q)	206.627	142	0.000325547

## Sheet: supplementary file 1e
supplementary file 1e. Leave-one out analyses for the 144 leukocyte telomere length SNPs.
Exposure	Outcome	SNP	Beta	SE	P	Z	Perc-Diff-Z	Beta_diff	Beta_diff_pct	Z_diff	Z_diff_pct
Telomere Length	Lung Adenocarcinoma	rs7705526	0.719566	0.0844195	1.55e-17	8.52369	37.6472	-0.189438	18.9438	-0.0969694	9.69694
Telomere Length	Lung Adenocarcinoma	rs9419958	0.839342	0.0955009	1.51e-18	8.78884	41.929	-0.0545137	5.45137	-0.0688787	6.88787
Telomere Length	Lung Adenocarcinoma	rs611646	0.915836	0.0940299	2.04e-22	9.73984	57.2864	0.0316529	3.16529	0.0318733	3.18733
Telomere Length	Lung Adenocarcinoma	rs2303262	0.865985	0.0948702	6.97e-20	9.1281	47.4077	-0.0245016	2.45016	-0.032936	3.2936
Telomere Length	Lung Adenocarcinoma	rs4724	0.908161	0.0944859	7.14e-22	9.61161	55.2157	0.0230081	2.30081	0.0182881	1.82881
Telomere Length	Lung Adenocarcinoma	rs2056726	0.906551	0.092417	1.03e-22	9.80935	58.409	0.0211944	2.11944	0.039238	3.9238
Telomere Length	Lung Adenocarcinoma	rs12638862	0.902568	0.0987795	6.41e-20	9.1372	47.5546	0.0167076	1.67076	-0.0319723	3.19723
Telomere Length	Lung Adenocarcinoma	rs2276182	0.87396	0.0939723	1.4e-20	9.3002	50.1868	-0.0155178	1.55178	-0.0147038	1.47038
Telomere Length	Lung Adenocarcinoma	rs115610405	0.875381	0.0943571	1.74e-20	9.27733	49.8174	-0.0139174	1.39174	-0.0171268	1.71268
Telomere Length	Lung Adenocarcinoma	rs10808899	0.876122	0.0938306	9.88e-21	9.33728	50.7856	-0.0130824	1.30824	-0.0107753	1.07753
Telomere Length	Lung Adenocarcinoma	rs965109	0.899186	0.0948423	2.52e-21	9.48085	53.1042	0.0128979	1.28979	0.0044355	0.44355
Telomere Length	Lung Adenocarcinoma	rs7790856	0.876338	0.095411	4.12e-20	9.18487	48.3244	-0.0128401	1.28401	-0.0269217	2.69217
Telomere Length	Lung Adenocarcinoma	rs76666449	0.898813	0.0937487	9.03e-22	9.58747	54.8259	0.0124775	1.24775	0.0157309	1.57309
Telomere Length	Lung Adenocarcinoma	rs8088824	0.898387	0.0941845	1.45e-21	9.53858	54.0365	0.0119973	1.19973	0.0105519	1.05519
Telomere Length	Lung Adenocarcinoma	rs1609812	0.898235	0.0949987	3.22e-21	9.45523	52.6904	0.0118266	1.18266	0.00172129	0.172129
Telomere Length	Lung Adenocarcinoma	rs932002	0.897869	0.0948031	2.77e-21	9.47089	52.9432	0.0114147	1.14147	0.00337987	0.337987
Telomere Length	Lung Adenocarcinoma	rs3757387	0.897834	0.0941065	1.42e-21	9.54062	54.0694	0.0113751	1.13751	0.0107678	1.07678
Telomere Length	Lung Adenocarcinoma	rs17464525	0.878096	0.0945312	1.56e-20	9.28896	50.0053	-0.0108593	1.08593	-0.0158947	1.58947
Telomere Length	Lung Adenocarcinoma	rs4919611	0.897079	0.0939274	1.29e-21	9.55077	54.2332	0.0105245	1.05245	0.0118425	1.18425
Telomere Length	Lung Adenocarcinoma	rs28502153	0.896846	0.0942848	1.87e-21	9.5121	53.6087	0.010262	1.0262	0.00774554	0.774554
Telomere Length	Lung Adenocarcinoma	rs28711261	0.89657	0.0929414	5.08e-22	9.64662	55.7811	0.00995132	0.995132	0.0219978	2.19978
Telomere Length	Lung Adenocarcinoma	rs144204502	0.896232	0.0944509	2.34e-21	9.48886	53.2334	0.00956977	0.956977	0.00528365	0.528365
Telomere Length	Lung Adenocarcinoma	rs12613375	0.895731	0.0935979	1.07e-21	9.56998	54.5435	0.00900547	0.900547	0.0138782	1.38782
Telomere Length	Lung Adenocarcinoma	rs12412214	0.895584	0.0944706	2.54e-21	9.48003	53.0909	0.00884086	0.884086	0.00434828	0.434828
Telomere Length	Lung Adenocarcinoma	rs76219171	0.895495	0.0940446	1.7e-21	9.52202	53.769	0.00873963	0.873963	0.00879726	0.879726
Telomere Length	Lung Adenocarcinoma	rs17803849	0.895482	0.0947498	3.36e-21	9.45102	52.6224	0.00872599	0.872599	0.00127525	0.127525
Telomere Length	Lung Adenocarcinoma	rs12572897	0.895434	0.0943946	2.4e-21	9.48607	53.1885	0.00867186	0.867186	0.00498882	0.498882
Telomere Length	Lung Adenocarcinoma	rs11579626	0.89535	0.0939601	1.59e-21	9.52905	53.8824	0.00857692	0.857692	0.00954124	0.954124
Telomere Length	Lung Adenocarcinoma	rs80324517	0.895342	0.0941188	1.85e-21	9.51289	53.6215	0.00856719	0.856719	0.00782971	0.782971
Telomere Length	Lung Adenocarcinoma	rs117469989	0.895052	0.0933904	9.34e-22	9.58397	54.7695	0.00824067	0.824067	0.0153607	1.53607
Telomere Length	Lung Adenocarcinoma	rs41304832	0.881071	0.093941	6.66e-21	9.37898	51.459	-0.00750841	0.750841	-0.00635758	0.635758
Telomere Length	Lung Adenocarcinoma	rs6565924	0.894393	0.0938468	1.57e-21	9.53035	53.9035	0.00749876	0.749876	0.00967972	0.967972
Telomere Length	Lung Adenocarcinoma	rs13230646	0.894389	0.0940952	2e-21	9.50515	53.4966	0.00749409	0.749409	0.00701	0.701
Telomere Length	Lung Adenocarcinoma	rs10024820	0.894379	0.0940069	1.84e-21	9.51398	53.6391	0.00748301	0.748301	0.0079448	0.79448
Telomere Length	Lung Adenocarcinoma	rs2230590	0.894336	0.094174	2.17e-21	9.49663	53.359	0.00743465	0.743465	0.00610716	0.610716
Telomere Length	Lung Adenocarcinoma	rs2293579	0.894141	0.0939038	1.7e-21	9.52188	53.7667	0.00721475	0.721475	0.00878235	0.878235
Telomere Length	Lung Adenocarcinoma	rs1907702	0.881444	0.0938551	5.91e-21	9.39154	51.6619	-0.00708804	0.708804	-0.0050265	0.50265
Telomere Length	Lung Adenocarcinoma	rs11646283	0.893966	0.0941552	2.21e-21	9.49459	53.3261	0.00701744	0.701744	0.00589133	0.589133
Telomere Length	Lung Adenocarcinoma	rs10845387	0.893589	0.0938436	1.7e-21	9.52211	53.7704	0.00659316	0.659316	0.00880647	0.880647
Telomere Length	Lung Adenocarcinoma	rs7209057	0.893522	0.0939012	1.81e-21	9.51555	53.6645	0.00651774	0.651774	0.00811179	0.811179
Telomere Length	Lung Adenocarcinoma	rs79127610	0.881976	0.0942276	7.97e-21	9.36007	51.1536	-0.00648816	0.648816	-0.00836085	0.836085
Telomere Length	Lung Adenocarcinoma	rs429358	0.893485	0.0939015	1.81e-21	9.51513	53.6577	0.00647554	0.647553	0.00806694	0.806694
Telomere Length	Lung Adenocarcinoma	rs114719295	0.88223	0.0940411	6.51e-21	9.38133	51.497	-0.00620216	0.620216	-0.00610846	0.610846
Telomere Length	Lung Adenocarcinoma	rs80150989	0.893105	0.0939306	1.94e-21	9.50813	53.5447	0.00604762	0.604762	0.00732558	0.732558
Telomere Length	Lung Adenocarcinoma	rs115451758	0.882404	0.0941718	7.24e-21	9.37015	51.3165	-0.00600643	0.600643	-0.00729222	0.729222
Telomere Length	Lung Adenocarcinoma	rs869785	0.89294	0.0942075	2.58e-21	9.47844	53.0652	0.00586171	0.586171	0.00417972	0.417972
Telomere Length	Lung Adenocarcinoma	rs8105767	0.882547	0.0949932	1.53e-20	9.29063	50.0324	-0.0058454	0.58454	-0.0157169	1.57169
Telomere Length	Lung Adenocarcinoma	rs13129697	0.882584	0.0942982	8.01e-21	9.3595	51.1444	-0.00580385	0.580385	-0.00842124	0.842124
Telomere Length	Lung Adenocarcinoma	rs117962821	0.892765	0.0940381	2.23e-21	9.49365	53.3109	0.00566483	0.566483	0.00579162	0.579162
Telomere Length	Lung Adenocarcinoma	rs2282764	0.88276	0.0943539	8.29e-21	9.35583	51.0852	-0.00560592	0.560592	-0.0088096	0.88096
Telomere Length	Lung Adenocarcinoma	rs76374777	0.882883	0.0940181	5.97e-21	9.39057	51.6462	-0.00546679	0.546679	-0.00512934	0.512934
Telomere Length	Lung Adenocarcinoma	rs6776756	0.892559	0.0944114	3.26e-21	9.45393	52.6694	0.00543265	0.543265	0.00158336	0.158336
Telomere Length	Lung Adenocarcinoma	rs139897613	0.883035	0.0941895	6.91e-21	9.37509	51.3962	-0.00529542	0.529542	-0.00676921	0.676921
Telomere Length	Lung Adenocarcinoma	rs4498805	0.892392	0.0943337	3.08e-21	9.45994	52.7665	0.00524411	0.524411	0.00222011	0.222011
Telomere Length	Lung Adenocarcinoma	rs12615793	0.892389	0.0950751	6.22e-21	9.38615	51.5748	0.0052411	0.52411	-0.00559802	0.559802
Telomere Length	Lung Adenocarcinoma	rs117238689	0.883326	0.0944653	8.7e-21	9.3508	51.004	-0.00496828	0.496828	-0.00934283	0.934283
Telomere Length	Lung Adenocarcinoma	rs71593392	0.892141	0.0940402	2.38e-21	9.48681	53.2003	0.00496181	0.496181	0.0050663	0.50663
Telomere Length	Lung Adenocarcinoma	rs12941945	0.883386	0.0945383	9.26e-21	9.34421	50.8975	-0.00490072	0.490072	-0.010041	1.0041
Telomere Length	Lung Adenocarcinoma	rs6873104	0.89206	0.0943367	3.2e-21	9.45613	52.7049	0.00487048	0.487048	0.0018161	0.18161
Telomere Length	Lung Adenocarcinoma	rs62207005	0.883692	0.0946016	9.52e-21	9.3412	50.849	-0.00455501	0.455501	-0.0103593	1.03593
Telomere Length	Lung Adenocarcinoma	rs10905255	0.891759	0.0944954	3.83e-21	9.43706	52.397	0.00453197	0.453197	-0.000203463	0.0203463
Telomere Length	Lung Adenocarcinoma	rs10851590	0.891725	0.0941829	2.85e-21	9.46801	52.8968	0.00449314	0.449314	0.00307499	0.307499
Telomere Length	Lung Adenocarcinoma	rs61748181	0.883763	0.0945174	8.74e-21	9.35027	50.9954	-0.00447534	0.447534	-0.00939859	0.939859
Telomere Length	Lung Adenocarcinoma	rs9600019	0.883786	0.0942336	6.68e-21	9.37867	51.454	-0.00444972	0.444973	-0.00639021	0.639021
Telomere Length	Lung Adenocarcinoma	rs13062095	0.883833	0.0942931	7.03e-21	9.37325	51.3666	-0.00439644	0.439644	-0.00696392	0.696392
Telomere Length	Lung Adenocarcinoma	rs138420497	0.883938	0.0943307	7.21e-21	9.37063	51.3241	-0.00427886	0.427886	-0.00724233	0.724233
Telomere Length	Lung Adenocarcinoma	rs6007020	0.883958	0.0943592	7.39e-21	9.36801	51.2819	-0.00425597	0.425597	-0.00751923	0.751923
Telomere Length	Lung Adenocarcinoma	rs3093888	0.883994	0.094324	7.13e-21	9.37188	51.3444	-0.00421562	0.421562	-0.00710912	0.710912
Telomere Length	Lung Adenocarcinoma	rs75664430	0.88408	0.0946166	9.29e-21	9.34381	50.8911	-0.00411869	0.411868	-0.010083	1.0083
Telomere Length	Lung Adenocarcinoma	rs75544730	0.884114	0.0943132	6.97e-21	9.37424	51.3824	-0.00407999	0.407999	-0.00685977	0.685977
Telomere Length	Lung Adenocarcinoma	rs1332941	0.891315	0.0945496	4.22e-21	9.42696	52.2339	0.00403181	0.403181	-0.00127404	0.127404
Telomere Length	Lung Adenocarcinoma	rs871134	0.891303	0.0945363	4.17e-21	9.42816	52.2532	0.00401822	0.401822	-0.00114695	0.114695
Telomere Length	Lung Adenocarcinoma	rs145170152	0.884203	0.0942108	6.27e-21	9.38536	51.5621	-0.00398033	0.398033	-0.00568082	0.568082
Telomere Length	Lung Adenocarcinoma	rs35640778	0.884218	0.0963593	4.46e-20	9.17626	48.1854	-0.00396294	0.396294	-0.027834	2.7834
Telomere Length	Lung Adenocarcinoma	rs7218033	0.884392	0.0946037	8.9e-21	9.34839	50.9651	-0.00376714	0.376714	-0.00959797	0.959797
Telomere Length	Lung Adenocarcinoma	rs762679	0.891015	0.0947074	5.05e-21	9.40808	51.929	0.00369314	0.369314	-0.00327401	0.327401
Telomere Length	Lung Adenocarcinoma	rs8053839	0.884537	0.0943727	7.06e-21	9.37281	51.3595	-0.00360314	0.360315	-0.00701049	0.701049
Telomere Length	Lung Adenocarcinoma	rs11769630	0.884556	0.094352	6.91e-21	9.37507	51.3958	-0.00358255	0.358255	-0.00677188	0.677188
Telomere Length	Lung Adenocarcinoma	rs5742915	0.890897	0.0945959	4.6e-21	9.41792	52.0879	0.00356059	0.356059	-0.00223182	0.223182
Telomere Length	Lung Adenocarcinoma	rs1881985	0.884666	0.0944552	7.53e-21	9.36599	51.2493	-0.00345828	0.345828	-0.00773332	0.773332
Telomere Length	Lung Adenocarcinoma	rs7101497	0.890699	0.0944639	4.14e-21	9.42899	52.2667	0.00333803	0.333803	-0.00105848	0.105848
Telomere Length	Lung Adenocarcinoma	rs117630647	0.8906	0.0944866	4.27e-21	9.42568	52.2132	0.00322649	0.322649	-0.00140925	0.140925
Telomere Length	Lung Adenocarcinoma	rs6584607	0.884922	0.0943144	6.43e-21	9.38268	51.5188	-0.00317041	0.317041	-0.00596497	0.596497
Telomere Length	Lung Adenocarcinoma	rs11190184	0.890535	0.0944748	4.25e-21	9.42617	52.221	0.00315307	0.315307	-0.00135815	0.135815
Telomere Length	Lung Adenocarcinoma	rs7012816	0.890533	0.0943696	3.85e-21	9.43666	52.3904	0.00315084	0.315084	-0.000246854	0.0246854
Telomere Length	Lung Adenocarcinoma	rs4362428	0.890529	0.094344	3.76e-21	9.43917	52.4311	0.00314657	0.314657	2e-05	0.00200061
Telomere Length	Lung Adenocarcinoma	rs183553155	0.884999	0.0944063	6.96e-21	9.37437	51.3846	-0.00308293	0.308293	-0.00684568	0.684568
Telomere Length	Lung Adenocarcinoma	rs2069536	0.890467	0.0944037	4e-21	9.43255	52.3241	0.0030767	0.30767	-0.000682063	0.0682063
Telomere Length	Lung Adenocarcinoma	rs10840270	0.890426	0.0944359	4.14e-21	9.42889	52.2651	0.00303046	0.303046	-0.00106909	0.106909
Telomere Length	Lung Adenocarcinoma	rs10773176	0.89031	0.0944867	4.4e-21	9.42259	52.1633	0.00289946	0.289946	-0.00173666	0.173666
Telomere Length	Lung Adenocarcinoma	rs11746381	0.890223	0.0944594	4.33e-21	9.4244	52.1925	0.0028018	0.28018	-0.00154533	0.154533
Telomere Length	Lung Adenocarcinoma	rs35902944	0.890176	0.0961649	2.11e-20	9.25676	49.4854	0.00274845	0.274846	-0.0193051	1.93051
Telomere Length	Lung Adenocarcinoma	rs72801474	0.890171	0.094329	3.84e-21	9.43687	52.3939	0.00274226	0.274226	-0.000223918	0.0223918
Telomere Length	Lung Adenocarcinoma	rs4530278	0.890164	0.0944453	4.29e-21	9.42518	52.2051	0.00273442	0.273442	-0.00146302	0.146302
Telomere Length	Lung Adenocarcinoma	rs66731853	0.890079	0.0945434	4.75e-21	9.4145	52.0327	0.00263892	0.263892	-0.00259362	0.259362
Telomere Length	Lung Adenocarcinoma	rs112625468	0.890069	0.0944967	4.55e-21	9.41905	52.1061	0.00262811	0.262811	-0.00211243	0.211243
Telomere Length	Lung Adenocarcinoma	rs12369950	0.885407	0.0944063	6.68e-21	9.37868	51.4543	-0.0026234	0.26234	-0.00638856	0.638856
Telomere Length	Lung Adenocarcinoma	rs17185038	0.890058	0.0943409	3.93e-21	9.43448	52.3553	0.00261499	0.261499	-0.000477328	0.0477328
Telomere Length	Lung Adenocarcinoma	rs34003787	0.889975	0.0944373	4.34e-21	9.42397	52.1856	0.00252152	0.252152	-0.0015908	0.15908
Telomere Length	Lung Adenocarcinoma	rs4743037	0.889921	0.0944238	4.31e-21	9.42475	52.1982	0.00246103	0.246103	-0.00150821	0.150821
Telomere Length	Lung Adenocarcinoma	rs3891167	0.88559	0.0952187	1.4e-20	9.30059	50.1932	-0.00241751	0.241751	-0.0146621	1.46621
Telomere Length	Lung Adenocarcinoma	rs2081601	0.889842	0.0944059	4.27e-21	9.42571	52.2136	0.00237252	0.237252	-0.0014068	0.14068
Telomere Length	Lung Adenocarcinoma	rs75683534	0.889802	0.0942902	3.84e-21	9.43685	52.3935	0.00232727	0.232727	-0.000226572	0.0226572
Telomere Length	Lung Adenocarcinoma	rs8102497	0.889801	0.094498	4.68e-21	9.41609	52.0583	0.00232621	0.232621	-0.00242591	0.242591
Telomere Length	Lung Adenocarcinoma	rs11866592	0.885745	0.0947854	9.21e-21	9.34474	50.9061	-0.00224346	0.224345	-0.00998478	0.998478
Telomere Length	Lung Adenocarcinoma	rs1023767	0.885767	0.0945469	7.35e-21	9.36855	51.2906	-0.00221794	0.221794	-0.00746248	0.746248
Telomere Length	Lung Adenocarcinoma	rs35671754	0.889698	0.0944122	4.36e-21	9.42354	52.1787	0.00220957	0.220957	-0.00163586	0.163586
Telomere Length	Lung Adenocarcinoma	rs9878436	0.885869	0.094496	6.94e-21	9.37467	51.3894	-0.00210368	0.210368	-0.00681385	0.681385
Telomere Length	Lung Adenocarcinoma	rs1291143	0.889541	0.0952978	1.02e-20	9.33433	50.7381	0.00203352	0.203352	-0.0110872	1.10872
Telomere Length	Lung Adenocarcinoma	rs6054257	0.889414	0.0944162	4.51e-21	9.42013	52.1236	0.00188961	0.188961	-0.00199711	0.199711
Telomere Length	Lung Adenocarcinoma	rs111527438	0.886073	0.0944332	6.41e-21	9.38306	51.525	-0.00187327	0.187327	-0.00592449	0.592449
Telomere Length	Lung Adenocarcinoma	rs145114957	0.886139	0.0944065	6.21e-21	9.38642	51.5792	-0.00179961	0.179961	-0.00556915	0.556915
Telomere Length	Lung Adenocarcinoma	rs146546514	0.886165	0.0947022	8.17e-21	9.35739	51.1103	-0.00176925	0.176925	-0.00864481	0.864481
Telomere Length	Lung Adenocarcinoma	rs10112752	0.889284	0.0949958	7.88e-21	9.3613	51.1735	0.00174405	0.174405	-0.00823043	0.823043
Telomere Length	Lung Adenocarcinoma	rs139795227	0.889259	0.0944655	4.79e-21	9.41359	52.0179	0.00171548	0.171548	-0.00269056	0.269056
Telomere Length	Lung Adenocarcinoma	rs112394943	0.888976	0.0944609	4.91e-21	9.41105	51.977	0.00139659	0.139659	-0.00295948	0.295947
Telomere Length	Lung Adenocarcinoma	rs6590343	0.888934	0.0944689	4.97e-21	9.40981	51.9569	0.00134962	0.134962	-0.00309106	0.309106
Telomere Length	Lung Adenocarcinoma	rs113800756	0.886599	0.0944512	6.18e-21	9.38684	51.586	-0.00128118	0.128118	-0.00552427	0.552427
Telomere Length	Lung Adenocarcinoma	rs8051249	0.888755	0.0944521	4.98e-21	9.40959	51.9533	0.00114766	0.114766	-0.00311471	0.31147
Telomere Length	Lung Adenocarcinoma	rs10150625	0.886729	0.094449	6.09e-21	9.38844	51.6118	-0.0011346	0.113461	-0.00535492	0.535492
Telomere Length	Lung Adenocarcinoma	rs182059586	0.888623	0.0944492	5.03e-21	9.40847	51.9353	0.000999223	0.0999223	-0.00323242	0.323242
Telomere Length	Lung Adenocarcinoma	rs6751209	0.886853	0.0944607	6.08e-21	9.38859	51.6142	-0.000994776	0.0994776	-0.00533907	0.533907
Telomere Length	Lung Adenocarcinoma	rs1980240	0.888608	0.0944904	5.24e-21	9.40422	51.8666	0.000982626	0.0982626	-0.00368366	0.368366
Telomere Length	Lung Adenocarcinoma	rs3768321	0.888528	0.0944849	5.26e-21	9.40391	51.8617	0.000892032	0.0892032	-0.00371571	0.371571
Telomere Length	Lung Adenocarcinoma	rs1003322	0.886954	0.0944619	6.03e-21	9.38954	51.6296	-0.000880918	0.0880918	-0.00523808	0.523808
Telomere Length	Lung Adenocarcinoma	rs11085072	0.888353	0.094466	5.26e-21	9.40395	51.8622	0.000694986	0.0694986	-0.00371209	0.371209
Telomere Length	Lung Adenocarcinoma	rs1985369	0.887212	0.0946433	6.97e-21	9.37428	51.3831	-0.000590129	0.0590129	-0.00685557	0.685557
Telomere Length	Lung Adenocarcinoma	rs1727302	0.887228	0.094612	6.75e-21	9.37753	51.4357	-0.000572867	0.0572867	-0.0065105	0.65105
Telomere Length	Lung Adenocarcinoma	rs17677991	0.888204	0.0947328	6.86e-21	9.37589	51.4092	0.000527321	0.0527321	-0.00668417	0.668417
Telomere Length	Lung Adenocarcinoma	rs2977608	0.888202	0.0944242	5.13e-21	9.40651	51.9036	0.000524406	0.0524406	-0.00344077	0.344077
Telomere Length	Lung Adenocarcinoma	rs2738775	0.88816	0.0945027	5.55e-21	9.39825	51.7702	0.000477269	0.0477269	-0.00431575	0.431575
Telomere Length	Lung Adenocarcinoma	rs76883411	0.888061	0.0944795	5.48e-21	9.39951	51.7906	0.00036578	0.036578	-0.00418202	0.418202
Telomere Length	Lung Adenocarcinoma	rs4660456	0.888056	0.0944852	5.51e-21	9.39889	51.7805	0.000360069	0.0360069	-0.00424826	0.424826
Telomere Length	Lung Adenocarcinoma	rs4695407	0.887486	0.094532	6.1e-21	9.38821	51.6081	-0.000281978	0.0281978	-0.00537933	0.537933
Telomere Length	Lung Adenocarcinoma	rs41269079	0.887968	0.0944923	5.6e-21	9.39725	51.7541	0.000260968	0.0260968	-0.00442182	0.442182
Telomere Length	Lung Adenocarcinoma	rs939916	0.887536	0.0947605	7.53e-21	9.36609	51.2509	-0.000225882	0.0225882	-0.00772263	0.772263
Telomere Length	Lung Adenocarcinoma	rs17445108	0.887917	0.094445	5.38e-21	9.40141	51.8213	0.000203559	0.0203559	-0.00398054	0.398054
Telomere Length	Lung Adenocarcinoma	rs139122544	0.887607	0.0944984	5.84e-21	9.39284	51.6828	-0.000144946	0.0144946	-0.00488932	0.488933
Telomere Length	Lung Adenocarcinoma	rs11557154	0.887615	0.0947971	7.73e-21	9.36332	51.2062	-0.000135944	0.0135944	-0.00801598	0.801598
Telomere Length	Lung Adenocarcinoma	rs6659669	0.887854	0.0944827	5.61e-21	9.397	51.75	0.000132731	0.0132731	-0.00444818	0.444818
Telomere Length	Lung Adenocarcinoma	rs6669563	0.887848	0.094624	6.42e-21	9.3829	51.5224	0.00012577	0.012577	-0.00594169	0.594169
Telomere Length	Lung Adenocarcinoma	rs9398196	0.887648	0.0945398	6.05e-21	9.38915	51.6233	-9.89e-05	0.00988819	-0.00527988	0.527988
Telomere Length	Lung Adenocarcinoma	rs61818036	0.887758	0.0945277	5.91e-21	9.39151	51.6614	2.46e-05	0.00245625	-0.0050298	0.50298
Telomere Length	Lung Adenocarcinoma	rs73581419	0.887739	0.0945307	5.94e-21	9.39101	51.6533	3.08e-06	0.000307749	-0.0050829	0.50829
Telomere Length	Lung Adenocarcinoma	All	0.887736	0.09405	3.76e-21	9.43899	NA	0	0	5.65e-16	5.65e-14
Telomere Length	Lung Cancer	rs7705526	0.400033	0.0600805	2.77e-11	6.65829	572.127	-0.174182	17.4182	-0.139796	13.9796
Telomere Length	Lung Cancer	rs35640778	0.466332	0.0636277	2.32e-13	7.32908	639.841	-0.0373148	3.73148	-0.0531347	5.31347
Telomere Length	Lung Cancer	rs2303262	0.467861	0.0629787	1.1e-13	7.42888	649.915	-0.0341586	3.41586	-0.0402416	4.02416
Telomere Length	Lung Cancer	rs9419958	0.467939	0.0642918	3.38e-13	7.27836	634.721	-0.0339979	3.39979	-0.0596872	5.96872
Telomere Length	Lung Cancer	rs1609812	0.498528	0.0627511	1.95e-15	7.94453	701.968	0.0291484	2.91484	0.0263772	2.63772
Telomere Length	Lung Cancer	rs2056726	0.496654	0.0615696	7.23e-16	8.06655	714.285	0.0252807	2.52807	0.0421411	4.21411
Telomere Length	Lung Cancer	rs76666449	0.496493	0.061427	6.34e-16	8.08264	715.91	0.0249475	2.49475	0.0442205	4.42205
Telomere Length	Lung Cancer	rs4724	0.496251	0.0630074	3.38e-15	7.87608	695.059	0.0244492	2.44492	0.017534	1.7534
Telomere Length	Lung Cancer	rs12941945	0.475228	0.0621578	2.08e-14	7.64552	671.785	-0.0189499	1.89499	-0.0122526	1.22526
Telomere Length	Lung Cancer	rs10024820	0.49339	0.0614664	9.99e-16	8.02699	710.293	0.0185429	1.85429	0.0370309	3.70309
Telomere Length	Lung Cancer	rs8088824	0.493142	0.0624822	2.96e-15	7.89252	696.719	0.0180306	1.80306	0.0196586	1.96586
Telomere Length	Lung Cancer	rs12638862	0.493047	0.0657588	6.49e-14	7.49781	656.874	0.0178346	1.78346	-0.0313357	3.13357
Telomere Length	Lung Cancer	rs3757387	0.492972	0.0623853	2.74e-15	7.90205	697.68	0.0176787	1.76787	0.020889	2.0889
Telomere Length	Lung Cancer	rs2230590	0.491029	0.062328	3.32e-15	7.87814	695.267	0.0136688	1.36688	0.0178007	1.78007
Telomere Length	Lung Cancer	rs1291143	0.478074	0.0633198	4.35e-14	7.55014	662.156	-0.0130765	1.30765	-0.0245749	2.45749
Telomere Length	Lung Cancer	rs4919611	0.490726	0.0624714	3.99e-15	7.85521	692.952	0.0130422	1.30422	0.0148375	1.48375
Telomere Length	Lung Cancer	rs2276182	0.478152	0.0628199	2.71e-14	7.61146	668.347	-0.0129155	1.29155	-0.0166524	1.66524
Telomere Length	Lung Cancer	rs429358	0.490595	0.0618641	2.19e-15	7.9302	700.522	0.0127717	1.27717	0.0245262	2.45262
Telomere Length	Lung Cancer	rs17464525	0.478514	0.0629483	2.92e-14	7.6017	667.361	-0.0121679	1.21679	-0.017914	1.7914
Telomere Length	Lung Cancer	rs11579626	0.490124	0.0624192	4.09e-15	7.85213	692.641	0.0117999	1.17999	0.0144396	1.44396
Telomere Length	Lung Cancer	rs1023767	0.478787	0.062519	1.88e-14	7.65827	673.072	-0.0116027	1.16027	-0.0106052	1.06052
Telomere Length	Lung Cancer	rs28711261	0.490006	0.0619607	2.61e-15	7.90833	698.315	0.0115564	1.15564	0.0217012	2.17012
Telomere Length	Lung Cancer	rs28502153	0.489928	0.0627893	6.06e-15	7.80274	687.656	0.0113964	1.13964	0.00805957	0.805957
Telomere Length	Lung Cancer	rs13230646	0.489836	0.0624591	4.42e-15	7.8425	691.669	0.0112054	1.12054	0.0131963	1.31963
Telomere Length	Lung Cancer	rs10808899	0.479057	0.0627379	2.24e-14	7.63583	670.807	-0.0110473	1.10473	-0.013504	1.3504
Telomere Length	Lung Cancer	rs139897613	0.479282	0.0623385	1.49e-14	7.68838	676.111	-0.0105813	1.05813	-0.0067153	0.67153
Telomere Length	Lung Cancer	rs12412214	0.489479	0.0628816	7.02e-15	7.78414	685.778	0.0104694	1.04694	0.0056563	0.56563
Telomere Length	Lung Cancer	rs611646	0.479407	0.0634173	4.04e-14	7.55955	663.106	-0.0103246	1.03246	-0.0233593	2.33593
Telomere Length	Lung Cancer	rs76219171	0.489304	0.0626037	5.46e-15	7.8159	688.984	0.0101076	1.01076	0.00975963	0.975963
Telomere Length	Lung Cancer	rs932002	0.489296	0.0631783	9.58e-15	7.74469	681.795	0.0100909	1.00909	0.000559093	0.0559093
Telomere Length	Lung Cancer	rs12572897	0.489088	0.0628499	7.15e-15	7.78184	685.546	0.00966115	0.966115	0.00535961	0.535961
Telomere Length	Lung Cancer	rs115451758	0.479864	0.06247	1.57e-14	7.68152	675.418	-0.00937938	0.937938	-0.00760228	0.760228
Telomere Length	Lung Cancer	rs2293579	0.488941	0.0624331	4.82e-15	7.83144	690.553	0.00935897	0.935897	0.0117675	1.17675
Telomere Length	Lung Cancer	rs3891167	0.479889	0.0632991	3.42e-14	7.58129	665.301	-0.00932867	0.932867	-0.0205508	2.05508
Telomere Length	Lung Cancer	rs1727302	0.479889	0.0627217	1.99e-14	7.65109	672.346	-0.00932811	0.932811	-0.0115335	1.15335
Telomere Length	Lung Cancer	rs10112752	0.488805	0.0631343	9.76e-15	7.7423	681.554	0.00907771	0.907771	0.000251145	0.0251145
Telomere Length	Lung Cancer	rs146546514	0.48018	0.062843	2.16e-14	7.64094	671.322	-0.00872832	0.872832	-0.0128442	1.28442
Telomere Length	Lung Cancer	rs145114957	0.48031	0.0623135	1.28e-14	7.70796	678.088	-0.00845992	0.845992	-0.00418575	0.418575
Telomere Length	Lung Cancer	rs7790856	0.480379	0.0635861	4.2e-14	7.55479	662.626	-0.00831619	0.831619	-0.0239741	2.39741
Telomere Length	Lung Cancer	rs10840270	0.488368	0.0626113	6.19e-15	7.8	687.379	0.00817503	0.817503	0.00770527	0.770527
Telomere Length	Lung Cancer	rs11646283	0.488333	0.0626825	6.67e-15	7.79057	686.427	0.00810256	0.810256	0.006487	0.648701
Telomere Length	Lung Cancer	rs6776756	0.488296	0.0627683	7.29e-15	7.77934	685.293	0.00802603	0.802603	0.00503539	0.503539
Telomere Length	Lung Cancer	rs6751209	0.480712	0.0624822	1.43e-14	7.69358	676.636	-0.0076294	0.76294	-0.00604305	0.604305
Telomere Length	Lung Cancer	rs8105767	0.488015	0.0632089	1.16e-14	7.72068	679.371	0.00744673	0.744673	-0.00254301	0.254301
Telomere Length	Lung Cancer	rs965109	0.487975	0.0633015	1.27e-14	7.70873	678.166	0.00736304	0.736304	-0.00408577	0.408577
Telomere Length	Lung Cancer	rs11085072	0.487972	0.0625022	5.84e-15	7.80729	688.114	0.00735846	0.735846	0.00864658	0.864658
Telomere Length	Lung Cancer	rs4743037	0.487923	0.0625974	6.46e-15	7.79462	686.835	0.00725562	0.725562	0.0070096	0.70096
Telomere Length	Lung Cancer	rs115610405	0.480983	0.0631047	2.5e-14	7.62199	669.409	-0.00706988	0.706988	-0.0152931	1.52931
Telomere Length	Lung Cancer	rs183553155	0.481001	0.0626684	1.65e-14	7.67534	674.795	-0.00703238	0.703237	-0.00839994	0.839994
Telomere Length	Lung Cancer	rs8053839	0.481039	0.062667	1.64e-14	7.67611	674.872	-0.00695478	0.695478	-0.00830074	0.830074
Telomere Length	Lung Cancer	rs11866592	0.487763	0.0630225	9.98e-15	7.73951	681.272	0.00692655	0.692655	-0.000110121	0.0110121
Telomere Length	Lung Cancer	rs71593392	0.487747	0.0624871	5.92e-15	7.80557	687.941	0.00689404	0.689404	0.00842456	0.842456
Telomere Length	Lung Cancer	rs41304832	0.481093	0.0626961	1.67e-14	7.67341	674.6	-0.00684377	0.684377	-0.0086499	0.864991
Telomere Length	Lung Cancer	rs11190184	0.487708	0.0627569	7.76e-15	7.77139	684.49	0.00681229	0.681229	0.00400854	0.400854
Telomere Length	Lung Cancer	rs12613375	0.487606	0.0626676	7.21e-15	7.78083	685.443	0.00660199	0.660199	0.00522813	0.522813
Telomere Length	Lung Cancer	rs117630647	0.487597	0.062773	8e-15	7.76763	684.111	0.00658317	0.658317	0.00352269	0.352269
Telomere Length	Lung Cancer	rs869785	0.487588	0.0627222	7.62e-15	7.77377	684.73	0.00656495	0.656495	0.00431575	0.431575
Telomere Length	Lung Cancer	rs17677991	0.481258	0.0629648	2.12e-14	7.64329	671.559	-0.00650207	0.650207	-0.0125406	1.25406
Telomere Length	Lung Cancer	rs6565924	0.487556	0.0626649	7.23e-15	7.78037	685.397	0.00649925	0.649925	0.00516869	0.516869
Telomere Length	Lung Cancer	rs10851590	0.48754	0.0625959	6.77e-15	7.78869	686.237	0.00646562	0.646562	0.00624339	0.624339
Telomere Length	Lung Cancer	rs138420497	0.48138	0.0627039	1.63e-14	7.67704	674.966	-0.00625059	0.625059	-0.00818066	0.818066
Telomere Length	Lung Cancer	rs112625468	0.487375	0.062781	8.29e-15	7.76309	683.652	0.00612418	0.612418	0.00293608	0.293608
Telomere Length	Lung Cancer	rs113800756	0.481479	0.062627	1.49e-14	7.68804	676.077	-0.00604731	0.604731	-0.00675927	0.675927
Telomere Length	Lung Cancer	rs75544730	0.481479	0.0626887	1.58e-14	7.68048	675.314	-0.0060462	0.60462	-0.00773609	0.773609
Telomere Length	Lung Cancer	rs145170152	0.481492	0.0625896	1.44e-14	7.69284	676.562	-0.00601951	0.601951	-0.00613876	0.613876
Telomere Length	Lung Cancer	rs117469989	0.487291	0.0625923	6.96e-15	7.78515	685.88	0.00595112	0.595113	0.00578695	0.578695
Telomere Length	Lung Cancer	rs117962821	0.487285	0.0626623	7.46e-15	7.77636	684.992	0.00593891	0.593891	0.00465125	0.465125
Telomere Length	Lung Cancer	rs1881985	0.48728	0.0627815	8.39e-15	7.76153	683.495	0.00593011	0.593011	0.00273513	0.273513
Telomere Length	Lung Cancer	rs12369950	0.481554	0.0626808	1.56e-14	7.68264	675.531	-0.00589131	0.589131	-0.00745752	0.745752
Telomere Length	Lung Cancer	rs7209057	0.487246	0.0626604	7.49e-15	7.77598	684.954	0.00585935	0.585935	0.00460216	0.460216
Telomere Length	Lung Cancer	rs13062095	0.481585	0.06272	1.61e-14	7.67833	675.097	-0.00582709	0.582709	-0.00801378	0.801378
Telomere Length	Lung Cancer	rs4695407	0.481735	0.0627798	1.68e-14	7.6734	674.598	-0.00551878	0.551878	-0.00865123	0.865123
Telomere Length	Lung Cancer	rs9878436	0.481891	0.0627968	1.67e-14	7.67382	674.641	-0.00519616	0.519616	-0.0085967	0.85967
Telomere Length	Lung Cancer	rs1907702	0.48192	0.0627278	1.56e-14	7.68272	675.54	-0.00513627	0.513627	-0.00744671	0.744671
Telomere Length	Lung Cancer	rs76883411	0.486889	0.0627022	8.16e-15	7.76511	683.856	0.00512242	0.512242	0.00319733	0.319733
Telomere Length	Lung Cancer	rs111527438	0.481936	0.0627045	1.52e-14	7.68583	675.853	-0.00510384	0.510384	-0.00704547	0.704547
Telomere Length	Lung Cancer	rs144204502	0.486852	0.0630539	1.15e-14	7.7212	679.424	0.00504559	0.504559	-0.0024748	0.24748
Telomere Length	Lung Cancer	rs80324517	0.486834	0.0628801	9.77e-15	7.74225	681.549	0.00500795	0.500795	0.000244702	0.0244702
Telomere Length	Lung Cancer	rs10905255	0.486792	0.0628961	9.97e-15	7.73963	681.284	0.00492197	0.492197	-9.44e-05	0.00944231
Telomere Length	Lung Cancer	rs6659669	0.486766	0.0627283	8.5e-15	7.75992	683.332	0.00486841	0.486841	0.00252658	0.252658
Telomere Length	Lung Cancer	rs61818036	0.482051	0.0628042	1.65e-14	7.67546	674.807	-0.00486536	0.486536	-0.00838474	0.838474
Telomere Length	Lung Cancer	rs66731853	0.486752	0.0628703	9.77e-15	7.74216	681.54	0.00483955	0.483955	0.000233057	0.0233057
Telomere Length	Lung Cancer	rs939916	0.486741	0.0630194	1.13e-14	7.72366	679.673	0.00481623	0.481623	-0.00215719	0.215719
Telomere Length	Lung Cancer	rs1332941	0.486718	0.0629213	1.03e-14	7.73535	680.852	0.00476851	0.476851	-0.000647393	0.0647393
Telomere Length	Lung Cancer	rs17803849	0.486649	0.0631521	1.3e-14	7.70598	677.888	0.00462563	0.462563	-0.00444167	0.444167
Telomere Length	Lung Cancer	rs7218033	0.482189	0.0629512	1.86e-14	7.65973	673.219	-0.00458122	0.458122	-0.0104171	1.04171
Telomere Length	Lung Cancer	rs9398196	0.486558	0.062831	9.64e-15	7.74392	681.718	0.00443867	0.443867	0.000460315	0.0460315
Telomere Length	Lung Cancer	rs7012816	0.486513	0.0627755	9.19e-15	7.75004	682.336	0.00434555	0.434555	0.0012511	0.12511
Telomere Length	Lung Cancer	rs13129697	0.482384	0.0628613	1.67e-14	7.67379	674.638	-0.0041778	0.41778	-0.00860049	0.860049
Telomere Length	Lung Cancer	rs6590343	0.486427	0.0627782	9.31e-15	7.74834	682.164	0.00416734	0.416733	0.00103124	0.103124
Telomere Length	Lung Cancer	rs6873104	0.486413	0.0628422	9.92e-15	7.74022	681.344	0.00413885	0.413885	-1.81e-05	0.00180503
Telomere Length	Lung Cancer	rs1980240	0.482416	0.0627965	1.56e-14	7.68222	675.489	-0.0041118	0.41118	-0.00751168	0.751168
Telomere Length	Lung Cancer	rs2282764	0.486343	0.0628834	1.04e-14	7.73404	680.72	0.00399459	0.399459	-0.000816399	0.0816399
Telomere Length	Lung Cancer	rs6584607	0.482503	0.062756	1.49e-14	7.68856	676.129	-0.00393245	0.393245	-0.00669204	0.669205
Telomere Length	Lung Cancer	rs4498805	0.482506	0.0628629	1.65e-14	7.67553	674.814	-0.00392669	0.392669	-0.00837576	0.837576
Telomere Length	Lung Cancer	rs8051249	0.486305	0.0627621	9.31e-15	7.74838	682.168	0.00391603	0.391603	0.0010361	0.10361
Telomere Length	Lung Cancer	rs4362428	0.486207	0.0627841	9.62e-15	7.74412	681.738	0.0037149	0.37149	0.000485791	0.0485791
Telomere Length	Lung Cancer	rs871134	0.482637	0.0629331	1.73e-14	7.66905	674.16	-0.00365497	0.365498	-0.00921284	0.921284
Telomere Length	Lung Cancer	rs139122544	0.482645	0.0627942	1.52e-14	7.68614	675.885	-0.00363943	0.363943	-0.00700506	0.700506
Telomere Length	Lung Cancer	rs2977608	0.482658	0.062674	1.35e-14	7.70109	677.394	-0.00361288	0.361288	-0.00507384	0.507384
Telomere Length	Lung Cancer	rs10773176	0.486075	0.0628751	1.07e-14	7.73081	680.394	0.00344141	0.344141	-0.00123405	0.123405
Telomere Length	Lung Cancer	rs35671754	0.48606	0.0627957	9.92e-15	7.74034	681.356	0.0034112	0.34112	-2.82e-06	0.000281861
Telomere Length	Lung Cancer	rs2738775	0.486022	0.0628339	1.03e-14	7.73503	680.82	0.00333194	0.333194	-0.00068847	0.068847
Telomere Length	Lung Cancer	rs1003322	0.485974	0.0627914	9.98e-15	7.7395	681.272	0.00323353	0.323352	-0.00011064	0.011064
Telomere Length	Lung Cancer	rs7101497	0.485939	0.0628823	1.09e-14	7.72776	680.086	0.00316017	0.316017	-0.00162831	0.162831
Telomere Length	Lung Cancer	rs76374777	0.483037	0.0628063	1.46e-14	7.69091	676.367	-0.00282935	0.282935	-0.00638834	0.638834
Telomere Length	Lung Cancer	rs35902944	0.485719	0.0639925	3.19e-14	7.59026	666.206	0.00270694	0.270694	-0.0193921	1.93921
Telomere Length	Lung Cancer	rs4530278	0.485508	0.0628731	1.14e-14	7.72203	679.508	0.00227143	0.227143	-0.00236812	0.236812
Telomere Length	Lung Cancer	rs117238689	0.483329	0.0629378	1.6e-14	7.67947	675.212	-0.00222757	0.222757	-0.00786635	0.786635
Telomere Length	Lung Cancer	rs72801474	0.485456	0.062822	1.1e-14	7.72748	680.058	0.00216392	0.216392	-0.00166379	0.166379
Telomere Length	Lung Cancer	rs10150625	0.483361	0.0628282	1.43e-14	7.69337	676.614	-0.0021617	0.21617	-0.00607112	0.607112
Telomere Length	Lung Cancer	rs11557154	0.483395	0.063073	1.8e-14	7.66405	673.655	-0.00209159	0.209159	-0.00985867	0.985867
Telomere Length	Lung Cancer	rs5742915	0.485387	0.062979	1.29e-14	7.70713	678.004	0.0020217	0.202171	-0.00429282	0.429282
Telomere Length	Lung Cancer	rs17185038	0.485372	0.0628205	1.11e-14	7.72633	679.942	0.00199067	0.199067	-0.00181256	0.181256
Telomere Length	Lung Cancer	rs11769630	0.483508	0.0628685	1.46e-14	7.69078	676.353	-0.00185766	0.185766	-0.00640564	0.640564
Telomere Length	Lung Cancer	rs61748181	0.485305	0.06296	1.28e-14	7.70815	678.106	0.00185113	0.185113	-0.00416161	0.416161
Telomere Length	Lung Cancer	rs73581419	0.485303	0.0628874	1.19e-14	7.71701	679.001	0.00184702	0.184702	-0.00301693	0.301693
Telomere Length	Lung Cancer	rs112394943	0.485263	0.0628531	1.16e-14	7.72059	679.363	0.00176576	0.176576	-0.00255411	0.255411
Telomere Length	Lung Cancer	rs3768321	0.483561	0.0628606	1.44e-14	7.69259	676.536	-0.0017482	0.17482	-0.00617148	0.617148
Telomere Length	Lung Cancer	rs10845387	0.485221	0.0628464	1.16e-14	7.72074	679.378	0.00167817	0.167817	-0.0025345	0.25345
Telomere Length	Lung Cancer	rs4660456	0.485218	0.0628569	1.17e-14	7.71941	679.243	0.00167279	0.167279	-0.00270696	0.270697
Telomere Length	Lung Cancer	rs9600019	0.483632	0.0628594	1.43e-14	7.69386	676.664	-0.00160276	0.160276	-0.00600803	0.600802
Telomere Length	Lung Cancer	rs2081601	0.483641	0.0628573	1.42e-14	7.69427	676.705	-0.00158288	0.158287	-0.00595469	0.595469
Telomere Length	Lung Cancer	rs6669563	0.485157	0.0629592	1.3e-14	7.70589	677.879	0.00154681	0.154681	-0.00445295	0.445295
Telomere Length	Lung Cancer	rs8102497	0.483669	0.0629024	1.48e-14	7.6892	676.193	-0.00152499	0.152499	-0.00660995	0.660995
Telomere Length	Lung Cancer	rs75683534	0.485137	0.0628058	1.12e-14	7.7244	679.747	0.00150614	0.150614	-0.00206145	0.206145
Telomere Length	Lung Cancer	rs62207005	0.485134	0.0629882	1.34e-14	7.70198	677.484	0.0014989	0.14989	-0.00495814	0.495814
Telomere Length	Lung Cancer	rs17445108	0.483684	0.0628258	1.37e-14	7.69882	677.165	-0.00149364	0.149364	-0.00536624	0.536624
Telomere Length	Lung Cancer	rs80150989	0.485005	0.0628549	1.2e-14	7.71627	678.927	0.00123307	0.123307	-0.00311188	0.311188
Telomere Length	Lung Cancer	rs11746381	0.485003	0.0628983	1.25e-14	7.71091	678.386	0.00122934	0.122934	-0.00380438	0.380438
Telomere Length	Lung Cancer	rs6007020	0.484982	0.0628949	1.25e-14	7.711	678.394	0.00118582	0.118582	-0.0037933	0.37933
Telomere Length	Lung Cancer	rs41269079	0.483877	0.0628717	1.4e-14	7.69625	676.906	-0.00109643	0.109643	-0.00569801	0.569801
Telomere Length	Lung Cancer	rs75664430	0.484877	0.0630087	1.41e-14	7.69539	676.818	0.000967507	0.0967507	-0.00581018	0.581018
Telomere Length	Lung Cancer	rs79127610	0.484876	0.0629029	1.27e-14	7.70834	678.125	0.000967088	0.0967088	-0.00413729	0.413729
Telomere Length	Lung Cancer	rs139795227	0.483965	0.0628789	1.4e-14	7.69679	676.96	-0.000913608	0.0913608	-0.0056291	0.56291
Telomere Length	Lung Cancer	rs114719295	0.484781	0.0628799	1.26e-14	7.70962	678.256	0.000769463	0.0769463	-0.0039707	0.39707
Telomere Length	Lung Cancer	rs6054257	0.484055	0.0628591	1.35e-14	7.70064	677.348	-0.00072794	0.072794	-0.00513179	0.513179
Telomere Length	Lung Cancer	rs1985369	0.484095	0.0629778	1.51e-14	7.68676	675.948	-0.000645617	0.0645617	-0.00692451	0.692451
Telomere Length	Lung Cancer	rs34003787	0.484655	0.0628826	1.29e-14	7.70729	678.02	0.000509758	0.0509758	-0.00427214	0.427214
Telomere Length	Lung Cancer	rs12615793	0.484216	0.0633049	2.03e-14	7.64894	672.13	-0.000397058	0.0397058	-0.0118109	1.18109
Telomere Length	Lung Cancer	rs2069536	0.484577	0.0628854	1.3e-14	7.70572	677.861	0.000348805	0.0348805	-0.00447579	0.447579
Telomere Length	Lung Cancer	rs3093888	0.484475	0.0628946	1.33e-14	7.70296	677.583	0.000138107	0.0138107	-0.00483134	0.483134
Telomere Length	Lung Cancer	rs762679	0.484348	0.0630541	1.57e-14	7.68147	675.413	-0.000123183	0.0123183	-0.00760843	0.760843
Telomere Length	Lung Cancer	rs182059586	0.484427	0.0628529	1.29e-14	7.70731	678.021	3.9e-05	0.00390353	-0.00427041	0.427041
Telomere Length	Lung Cancer	All	0.484408	0.0625821	9.91e-15	7.74036	NA	0	0	-3.44e-16	3.44e-14
Telomere Length	Lung Ever Smokers	rs7705526	0.351767	0.0692416	3.77e-07	5.08029	-33.1691	-0.182677	18.2677	-0.173926	17.3926
Telomere Length	Lung Ever Smokers	rs4724	0.44966	0.069965	1.3e-10	6.42693	-15.454	0.044776	4.4776	0.0450438	4.50438
Telomere Length	Lung Ever Smokers	rs7790856	0.411777	0.0705057	5.21e-09	5.84033	-23.1707	-0.0432453	4.32453	-0.050339	5.0339
Telomere Length	Lung Ever Smokers	rs12941945	0.415398	0.0685169	1.34e-09	6.0627	-20.2455	-0.0348323	3.48323	-0.0141814	1.41814
Telomere Length	Lung Ever Smokers	rs10024820	0.44401	0.0673971	4.46e-11	6.58796	-13.3357	0.0316469	3.16469	0.0712283	7.12283
Telomere Length	Lung Ever Smokers	rs9419958	0.417061	0.0721076	7.3e-09	5.78387	-23.9135	-0.0309678	3.09678	-0.0595209	5.95209
Telomere Length	Lung Ever Smokers	rs1609812	0.441742	0.0705254	3.76e-10	6.26359	-17.6027	0.0263794	2.63794	0.0184845	1.84845
Telomere Length	Lung Ever Smokers	rs76666449	0.440562	0.0694986	2.31e-10	6.33915	-16.6088	0.0236375	2.36375	0.0307706	3.07706
Telomere Length	Lung Ever Smokers	rs8088824	0.4391	0.0700132	3.57e-10	6.27168	-17.4964	0.0202398	2.02398	0.0197992	1.97992
Telomere Length	Lung Ever Smokers	rs10112752	0.4389	0.0704304	4.61e-10	6.23168	-18.0226	0.0197748	1.97748	0.0132952	1.32952
Telomere Length	Lung Ever Smokers	rs2303262	0.422153	0.0709908	2.74e-09	5.94658	-21.773	-0.0191365	1.91365	-0.0330623	3.30623
Telomere Length	Lung Ever Smokers	rs139897613	0.42216	0.0691454	1.03e-09	6.10539	-19.6839	-0.0191205	1.91205	-0.00724	0.724
Telomere Length	Lung Ever Smokers	rs4695407	0.422237	0.0693152	1.12e-09	6.09155	-19.866	-0.0189421	1.89421	-0.00949089	0.949089
Telomere Length	Lung Ever Smokers	rs13062095	0.422535	0.0691848	1.01e-09	6.10733	-19.6584	-0.0182497	1.82497	-0.00692448	0.692448
Telomere Length	Lung Ever Smokers	rs2056726	0.438109	0.069953	3.78e-10	6.26291	-17.6118	0.0179377	1.79377	0.0183729	1.83729
Telomere Length	Lung Ever Smokers	rs3757387	0.437889	0.070046	4.07e-10	6.25144	-17.7626	0.0174249	1.74249	0.0165083	1.65083
Telomere Length	Lung Ever Smokers	rs35902944	0.423192	0.0714777	3.21e-09	5.92062	-22.1146	-0.0167223	1.67223	-0.0372846	3.72846
Telomere Length	Lung Ever Smokers	rs117630647	0.437282	0.0697721	3.67e-10	6.26729	-17.5541	0.0160167	1.60167	0.0190862	1.90862
Telomere Length	Lung Ever Smokers	rs17803849	0.436565	0.0705	5.92e-10	6.19242	-18.539	0.0143505	1.43505	0.00691156	0.691156
Telomere Length	Lung Ever Smokers	rs12369950	0.424255	0.0695257	1.05e-09	6.10213	-19.7268	-0.0142534	1.42534	-0.00777038	0.777038
Telomere Length	Lung Ever Smokers	rs13230646	0.436274	0.0698904	4.31e-10	6.24226	-17.8833	0.0136742	1.36742	0.0150162	1.50162
Telomere Length	Lung Ever Smokers	rs1023767	0.424581	0.0699907	1.31e-09	6.06626	-20.1987	-0.0134943	1.34943	-0.0136032	1.36032
Telomere Length	Lung Ever Smokers	rs28502153	0.436013	0.0702687	5.47e-10	6.20493	-18.3744	0.0130662	1.30662	0.00894568	0.894568
Telomere Length	Lung Ever Smokers	rs3891167	0.424838	0.0707756	1.94e-09	6.0026	-21.0361	-0.0128985	1.28985	-0.0239542	2.39542
Telomere Length	Lung Ever Smokers	rs12572897	0.43583	0.0702803	5.6e-10	6.20131	-18.422	0.0126413	1.26413	0.00835718	0.835718
Telomere Length	Lung Ever Smokers	rs71593392	0.435795	0.0694369	3.47e-10	6.27613	-17.4378	0.0125601	1.25601	0.0205231	2.05231
Telomere Length	Lung Ever Smokers	rs10840270	0.435702	0.0698912	4.55e-10	6.234	-17.992	0.0123448	1.23448	0.0136729	1.36729
Telomere Length	Lung Ever Smokers	rs965109	0.425086	0.0708228	1.95e-09	6.00211	-21.0426	-0.0123216	1.23216	-0.0240342	2.40342
Telomere Length	Lung Ever Smokers	rs869785	0.435455	0.0699426	4.79e-10	6.22589	-18.0987	0.011771	1.1771	0.0123541	1.23541
Telomere Length	Lung Ever Smokers	rs7012816	0.435453	0.0697999	4.42e-10	6.23859	-17.9316	0.0117661	1.17661	0.0144193	1.44193
Telomere Length	Lung Ever Smokers	rs6007020	0.435437	0.0699442	4.8e-10	6.22549	-18.104	0.0117286	1.17286	0.0122882	1.22882
Telomere Length	Lung Ever Smokers	rs2282764	0.435319	0.0701057	5.32e-10	6.20946	-18.3149	0.0114537	1.14537	0.00968184	0.968185
Telomere Length	Lung Ever Smokers	rs138420497	0.425543	0.0699396	1.17e-09	6.08444	-19.9594	-0.0112586	1.12586	-0.0106461	1.06461
Telomere Length	Lung Ever Smokers	rs35640778	0.425557	0.0716396	2.85e-09	5.94024	-21.8564	-0.0112283	1.12283	-0.0340941	3.40941
Telomere Length	Lung Ever Smokers	rs28711261	0.435193	0.0697148	4.31e-10	6.24247	-17.8805	0.0111609	1.11609	0.0150506	1.50506
Telomere Length	Lung Ever Smokers	rs10851590	0.435091	0.0697673	4.48e-10	6.23632	-17.9615	0.0109257	1.09257	0.0140503	1.40503
Telomere Length	Lung Ever Smokers	rs117962821	0.435014	0.0697832	4.55e-10	6.23379	-17.9948	0.0107457	1.07457	0.0136386	1.36386
Telomere Length	Lung Ever Smokers	rs61818036	0.425796	0.0700213	1.19e-09	6.08095	-20.0054	-0.0106723	1.06723	-0.0112143	1.12143
Telomere Length	Lung Ever Smokers	rs41304832	0.425809	0.0699838	1.17e-09	6.08439	-19.9601	-0.0106417	1.06417	-0.0106546	1.06546
Telomere Length	Lung Ever Smokers	rs429358	0.434853	0.0698305	4.75e-10	6.22727	-18.0806	0.0103722	1.03722	0.0125781	1.25781
Telomere Length	Lung Ever Smokers	rs2293579	0.434816	0.069946	5.09e-10	6.21644	-18.223	0.0102852	1.02852	0.0108179	1.08179
Telomere Length	Lung Ever Smokers	rs12613375	0.434816	0.0699593	5.12e-10	6.21526	-18.2385	0.010285	1.0285	0.0106258	1.06258
Telomere Length	Lung Ever Smokers	rs113800756	0.42599	0.0698389	1.06e-09	6.0996	-19.76	-0.0102216	1.02216	-0.00818063	0.818063
Telomere Length	Lung Ever Smokers	rs11866592	0.434718	0.070462	6.85e-10	6.16955	-18.8399	0.010059	1.0059	0.00319215	0.319215
Telomere Length	Lung Ever Smokers	rs8105767	0.434694	0.0706847	7.76e-10	6.14976	-19.1002	0.0100018	1.00018	-2.58e-05	0.00258124
Telomere Length	Lung Ever Smokers	rs4919611	0.43466	0.0702014	5.96e-10	6.19162	-18.5496	0.00992438	0.992438	0.00678103	0.678103
Telomere Length	Lung Ever Smokers	rs11085072	0.434603	0.0698457	4.9e-10	6.22232	-18.1456	0.0097902	0.97902	0.011774	1.1774
Telomere Length	Lung Ever Smokers	rs61748181	0.426187	0.0702645	1.32e-09	6.06548	-20.209	-0.00976218	0.976218	-0.0137302	1.37302
Telomere Length	Lung Ever Smokers	rs7218033	0.426221	0.0703102	1.34e-09	6.06201	-20.2546	-0.00968434	0.968434	-0.0142938	1.42938
Telomere Length	Lung Ever Smokers	rs2276182	0.426336	0.0704479	1.43e-09	6.05179	-20.389	-0.00941703	0.941703	-0.0159555	1.59555
Telomere Length	Lung Ever Smokers	rs17464525	0.426669	0.070548	1.47e-09	6.04792	-20.4399	-0.0086444	0.86444	-0.0165851	1.65851
Telomere Length	Lung Ever Smokers	rs4743037	0.434026	0.070051	5.8e-10	6.19586	-18.4937	0.00845125	0.845125	0.00747142	0.747141
Telomere Length	Lung Ever Smokers	rs4362428	0.434001	0.0700057	5.66e-10	6.19951	-18.4457	0.00839248	0.839248	0.00806498	0.806498
Telomere Length	Lung Ever Smokers	rs1727302	0.42679	0.070274	1.25e-09	6.07323	-20.1069	-0.00836189	0.836189	-0.0124688	1.24688
Telomere Length	Lung Ever Smokers	rs2230590	0.43398	0.070221	6.4e-10	6.1802	-18.6998	0.00834281	0.834281	0.0049241	0.492411
Telomere Length	Lung Ever Smokers	rs117238689	0.426862	0.0702365	1.22e-09	6.07749	-20.0509	-0.00819497	0.819496	-0.0117762	1.17762
Telomere Length	Lung Ever Smokers	rs11579626	0.433901	0.0701987	6.37e-10	6.18105	-18.6886	0.00816095	0.816095	0.00506256	0.506256
Telomere Length	Lung Ever Smokers	rs112394943	0.433857	0.0700266	5.81e-10	6.1956	-18.4972	0.00805743	0.805743	0.0074285	0.74285
Telomere Length	Lung Ever Smokers	rs4498805	0.426923	0.0702011	1.19e-09	6.08143	-19.9991	-0.00805344	0.805344	-0.011136	1.1136
Telomere Length	Lung Ever Smokers	rs4530278	0.433841	0.0701394	6.19e-10	6.18541	-18.6312	0.00802055	0.802055	0.00577154	0.577154
Telomere Length	Lung Ever Smokers	rs115451758	0.42695	0.0701048	1.13e-09	6.09017	-19.8841	-0.00798941	0.798941	-0.00971427	0.971428
Telomere Length	Lung Ever Smokers	rs8053839	0.426997	0.0701295	1.14e-09	6.0887	-19.9035	-0.00788105	0.788105	-0.00995405	0.995405
Telomere Length	Lung Ever Smokers	rs2977608	0.427179	0.0697442	9.07e-10	6.12494	-19.4267	-0.00745942	0.745942	-0.0040613	0.40613
Telomere Length	Lung Ever Smokers	rs1980240	0.427188	0.0701254	1.12e-09	6.09178	-19.8629	-0.00743707	0.743707	-0.00945319	0.945319
Telomere Length	Lung Ever Smokers	rs6751209	0.427283	0.0700569	1.07e-09	6.09908	-19.7669	-0.00721766	0.721766	-0.0082658	0.82658
Telomere Length	Lung Ever Smokers	rs1985369	0.43349	0.0703423	7.16e-10	6.16258	-18.9316	0.00720391	0.720392	0.00205878	0.205878
Telomere Length	Lung Ever Smokers	rs35671754	0.433459	0.0700838	6.22e-10	6.18486	-18.6384	0.00713246	0.713246	0.00568269	0.568269
Telomere Length	Lung Ever Smokers	rs1881985	0.433438	0.0702209	6.72e-10	6.1725	-18.8011	0.00708517	0.708517	0.00367227	0.367227
Telomere Length	Lung Ever Smokers	rs9600019	0.433438	0.0701104	6.32e-10	6.18222	-18.6731	0.00708507	0.708507	0.00525362	0.525362
Telomere Length	Lung Ever Smokers	rs76219171	0.433346	0.0702771	6.99e-10	6.16625	-18.8832	0.00687137	0.687137	0.0026566	0.26566
Telomere Length	Lung Ever Smokers	rs139122544	0.427437	0.0701129	1.08e-09	6.09641	-19.802	-0.00685853	0.685853	-0.00869974	0.869974
Telomere Length	Lung Ever Smokers	rs80150989	0.433193	0.0701104	6.46e-10	6.17872	-18.7192	0.00651464	0.651464	0.0046847	0.46847
Telomere Length	Lung Ever Smokers	rs11190184	0.433163	0.0702612	7.05e-10	6.16505	-18.8991	0.00644567	0.644567	0.00246032	0.246032
Telomere Length	Lung Ever Smokers	rs145170152	0.427694	0.0700922	1.05e-09	6.10188	-19.7301	-0.00626114	0.626114	-0.00781069	0.781069
Telomere Length	Lung Ever Smokers	rs6565924	0.433019	0.0701889	6.86e-10	6.16934	-18.8426	0.00611124	0.611124	0.00315884	0.315884
Telomere Length	Lung Ever Smokers	rs183553155	0.427785	0.0702389	1.13e-09	6.09043	-19.8807	-0.00604989	0.604989	-0.00967233	0.967233
Telomere Length	Lung Ever Smokers	rs871134	0.427799	0.0703556	1.2e-09	6.08052	-20.011	-0.00601815	0.601815	-0.0112837	1.12837
Telomere Length	Lung Ever Smokers	rs11769630	0.427815	0.0701934	1.1e-09	6.09481	-19.8231	-0.00598025	0.598025	-0.00896025	0.896025
Telomere Length	Lung Ever Smokers	rs4660456	0.432954	0.0701694	6.82e-10	6.17013	-18.8322	0.00595977	0.595977	0.00328694	0.328694
Telomere Length	Lung Ever Smokers	rs11746381	0.432938	0.0702545	7.16e-10	6.16243	-18.9335	0.00592282	0.592282	0.00203465	0.203465
Telomere Length	Lung Ever Smokers	rs75544730	0.427845	0.0701866	1.09e-09	6.09582	-19.8097	-0.0059105	0.59105	-0.00879527	0.879527
Telomere Length	Lung Ever Smokers	rs10808899	0.427915	0.0704058	1.22e-09	6.07783	-20.0464	-0.0057489	0.57489	-0.011721	1.1721
Telomere Length	Lung Ever Smokers	rs12615793	0.432858	0.0707756	9.6e-10	6.11592	-19.5454	0.0057356	0.57356	-0.00552811	0.552811
Telomere Length	Lung Ever Smokers	rs34003787	0.43285	0.0702069	7.03e-10	6.16534	-18.8952	0.00571697	0.571697	0.00250813	0.250813
Telomere Length	Lung Ever Smokers	rs1907702	0.428005	0.0701983	1.08e-09	6.09709	-19.7931	-0.00553905	0.553905	-0.00859005	0.859005
Telomere Length	Lung Ever Smokers	rs6054257	0.428096	0.0701643	1.05e-09	6.10134	-19.7372	-0.00532821	0.532821	-0.00789876	0.789876
Telomere Length	Lung Ever Smokers	rs75664430	0.432533	0.0704328	8.2e-10	6.14107	-19.2145	0.00498134	0.498134	-0.00143814	0.143814
Telomere Length	Lung Ever Smokers	rs1332941	0.432496	0.0703907	8.04e-10	6.14423	-19.173	0.00489626	0.489626	-0.000924689	0.0924689
Telomere Length	Lung Ever Smokers	rs1291143	0.428307	0.0709408	1.56e-09	6.03753	-20.5766	-0.00483718	0.483718	-0.0182739	1.82739
Telomere Length	Lung Ever Smokers	rs111527438	0.428364	0.0702045	1.05e-09	6.10166	-19.7329	-0.00470427	0.470427	-0.00784601	0.784601
Telomere Length	Lung Ever Smokers	rs144204502	0.432382	0.0705558	8.89e-10	6.12823	-19.3834	0.00463032	0.463032	-0.00352598	0.352598
Telomere Length	Lung Ever Smokers	rs1003322	0.432372	0.0702007	7.32e-10	6.15908	-18.9775	0.00460787	0.460787	0.00149104	0.149104
Telomere Length	Lung Ever Smokers	rs3768321	0.432352	0.0702353	7.47e-10	6.15577	-19.0212	0.00456098	0.456098	0.000951439	0.0951439
Telomere Length	Lung Ever Smokers	rs2738775	0.432342	0.070264	7.6e-10	6.15311	-19.0562	0.0045369	0.45369	0.000518884	0.0518884
Telomere Length	Lung Ever Smokers	rs6776756	0.432329	0.070359	8.02e-10	6.14462	-19.1678	0.00450847	0.450847	-0.000860247	0.0860247
Telomere Length	Lung Ever Smokers	rs76883411	0.432302	0.0702177	7.43e-10	6.15659	-19.0103	0.00444489	0.444489	0.00108592	0.108592
Telomere Length	Lung Ever Smokers	rs76374777	0.428492	0.0702024	1.04e-09	6.10366	-19.7066	-0.00440836	0.440836	-0.00752127	0.752127
Telomere Length	Lung Ever Smokers	rs10150625	0.432239	0.070206	7.43e-10	6.15673	-19.0085	0.0042993	0.42993	0.0011081	0.11081
Telomere Length	Lung Ever Smokers	rs10845387	0.432214	0.0702163	7.49e-10	6.15546	-19.0252	0.0042399	0.42399	0.000902118	0.0902118
Telomere Length	Lung Ever Smokers	rs7209057	0.432179	0.0702353	7.59e-10	6.1533	-19.0537	0.00415828	0.415828	0.000550029	0.0550029
Telomere Length	Lung Ever Smokers	rs66731853	0.432085	0.0703549	8.17e-10	6.14151	-19.2088	0.00394097	0.394097	-0.00136723	0.136723
Telomere Length	Lung Ever Smokers	rs6669563	0.428757	0.070389	1.12e-09	6.09125	-19.8698	-0.00379123	0.379123	-0.00953857	0.953857
Telomere Length	Lung Ever Smokers	rs8051249	0.431946	0.0702414	7.77e-10	6.14946	-19.1041	0.00361854	0.361854	-7.38e-05	0.00738328
Telomere Length	Lung Ever Smokers	rs13129697	0.428882	0.0703384	1.08e-09	6.09741	-19.7889	-0.00350214	0.350214	-0.00853816	0.853816
Telomere Length	Lung Ever Smokers	rs17445108	0.43186	0.0701981	7.65e-10	6.15202	-19.0705	0.00341857	0.341857	0.000342448	0.0342448
Telomere Length	Lung Ever Smokers	rs115610405	0.431842	0.0706458	9.79e-10	6.11278	-19.5867	0.00337614	0.337614	-0.00603868	0.603868
Telomere Length	Lung Ever Smokers	rs5742915	0.431827	0.0704255	8.7e-10	6.13169	-19.338	0.00334087	0.334087	-0.00296417	0.296417
Telomere Length	Lung Ever Smokers	rs17677991	0.431822	0.0704887	9e-10	6.12612	-19.4112	0.0033298	0.33298	-0.00386962	0.386962
Telomere Length	Lung Ever Smokers	rs3093888	0.429045	0.0703089	1.05e-09	6.10229	-19.7246	-0.00312167	0.312167	-0.00774333	0.774333
Telomere Length	Lung Ever Smokers	rs939916	0.429055	0.0705118	1.17e-09	6.08487	-19.9538	-0.00309866	0.309866	-0.0105764	1.05764
Telomere Length	Lung Ever Smokers	rs10773176	0.4317	0.0703394	8.39e-10	6.13738	-19.263	0.00304635	0.304635	-0.00203743	0.203743
Telomere Length	Lung Ever Smokers	rs146546514	0.429098	0.0704541	1.13e-09	6.09046	-19.8802	-0.00299958	0.299958	-0.00966703	0.966703
Telomere Length	Lung Ever Smokers	rs762679	0.431566	0.0705033	9.29e-10	6.12122	-19.4757	0.00273381	0.273381	-0.00466659	0.466659
Telomere Length	Lung Ever Smokers	rs2081601	0.429295	0.0702804	1.01e-09	6.10831	-19.6454	-0.00254282	0.254283	-0.00676474	0.676474
Telomere Length	Lung Ever Smokers	rs11646283	0.431396	0.070349	8.67e-10	6.13223	-19.3308	0.00234073	0.234073	-0.00287536	0.287536
Telomere Length	Lung Ever Smokers	rs114719295	0.429407	0.0702894	1e-09	6.10913	-19.6347	-0.00228142	0.228142	-0.00663152	0.663152
Telomere Length	Lung Ever Smokers	rs6590343	0.431359	0.0702939	8.44e-10	6.13651	-19.2745	0.00225473	0.225473	-0.00217929	0.217929
Telomere Length	Lung Ever Smokers	rs7101497	0.431347	0.0703507	8.71e-10	6.13139	-19.3419	0.00222621	0.222621	-0.00301282	0.301282
Telomere Length	Lung Ever Smokers	rs12412214	0.431321	0.070524	9.6e-10	6.11595	-19.545	0.00216642	0.216642	-0.00552274	0.552274
Telomere Length	Lung Ever Smokers	rs8102497	0.429465	0.0703433	1.03e-09	6.10528	-19.6853	-0.0021459	0.21459	-0.0072575	0.72575
Telomere Length	Lung Ever Smokers	rs9878436	0.431282	0.0703361	8.69e-10	6.13172	-19.3375	0.00207412	0.207412	-0.00295794	0.295794
Telomere Length	Lung Ever Smokers	rs11557154	0.42951	0.0705427	1.14e-09	6.08865	-19.904	-0.00204164	0.204164	-0.00996128	0.996128
Telomere Length	Lung Ever Smokers	rs6584607	0.431266	0.0702761	8.42e-10	6.13673	-19.2716	0.00203701	0.203701	-0.00214375	0.214375
Telomere Length	Lung Ever Smokers	rs62207005	0.429521	0.0704493	1.08e-09	6.09688	-19.7959	-0.00201705	0.201705	-0.00862403	0.862403
Telomere Length	Lung Ever Smokers	rs112625468	0.43125	0.0703505	8.79e-10	6.13002	-19.3598	0.0020008	0.20008	-0.00323431	0.323431
Telomere Length	Lung Ever Smokers	rs17185038	0.431224	0.0702626	8.39e-10	6.13731	-19.2639	0.00193893	0.193893	-0.00204903	0.204903
Telomere Length	Lung Ever Smokers	rs932002	0.429556	0.0707665	1.28e-09	6.07005	-20.1488	-0.00193521	0.193521	-0.0129869	1.29869
Telomere Length	Lung Ever Smokers	rs6659669	0.431104	0.0702977	8.65e-10	6.13254	-19.3267	0.00166023	0.166023	-0.00282517	0.282517
Telomere Length	Lung Ever Smokers	rs2069536	0.430966	0.0703191	8.86e-10	6.12872	-19.377	0.00134014	0.134014	-0.00344628	0.344628
Telomere Length	Lung Ever Smokers	rs6873104	0.429873	0.0703473	9.92e-10	6.11073	-19.6136	-0.00119832	0.119832	-0.00637124	0.637124
Telomere Length	Lung Ever Smokers	rs79127610	0.43089	0.0703425	9.03e-10	6.1256	-19.418	0.00116379	0.116379	-0.00395341	0.395341
Telomere Length	Lung Ever Smokers	rs10905255	0.430868	0.0704084	9.38e-10	6.11956	-19.4975	0.00111363	0.111363	-0.00493578	0.493578
Telomere Length	Lung Ever Smokers	rs12638862	0.429923	0.0737032	5.44e-09	5.83317	-23.2649	-0.00108209	0.108209	-0.0515036	5.15036
Telomere Length	Lung Ever Smokers	rs145114957	0.429925	0.0702903	9.57e-10	6.11641	-19.5389	-0.00107917	0.107917	-0.00544752	0.544752
Telomere Length	Lung Ever Smokers	rs41269079	0.430744	0.0703137	9.01e-10	6.12603	-19.4124	0.000824222	0.0824222	-0.0038837	0.38837
Telomere Length	Lung Ever Smokers	rs80324517	0.430132	0.0703943	9.94e-10	6.11032	-19.619	-0.000598052	0.0598052	-0.00643828	0.643828
Telomere Length	Lung Ever Smokers	rs182059586	0.430646	0.0702865	8.95e-10	6.12701	-19.3995	0.000597789	0.0597789	-0.00372423	0.372423
Telomere Length	Lung Ever Smokers	rs117469989	0.430614	0.0702941	9.02e-10	6.12589	-19.4142	0.000522792	0.0522792	-0.00390624	0.390624
Telomere Length	Lung Ever Smokers	rs72801474	0.430609	0.070284	8.97e-10	6.1267	-19.4035	0.000510673	0.0510673	-0.00377477	0.377477
Telomere Length	Lung Ever Smokers	rs9398196	0.430205	0.0703509	9.65e-10	6.11513	-19.5557	-0.000426677	0.0426677	-0.00565535	0.565535
Telomere Length	Lung Ever Smokers	rs75683534	0.430572	0.0702658	8.91e-10	6.12777	-19.3895	0.000425754	0.0425754	-0.00360157	0.360157
Telomere Length	Lung Ever Smokers	rs73581419	0.43055	0.0703405	9.3e-10	6.12094	-19.4793	0.000374029	0.0374029	-0.00471175	0.471175
Telomere Length	Lung Ever Smokers	rs139795227	0.430281	0.0703267	9.46e-10	6.11831	-19.5139	-0.000251119	0.0251119	-0.00513832	0.513832
Telomere Length	Lung Ever Smokers	All	0.430389	0.0699829	7.75e-10	6.14991	NA	0	0	7.22e-16	7.22e-14
Telomere Length	Lung Never Smokers	rs7705526	0.526781	0.171669	0.00215079	3.06858	-25.5347	-0.252274	25.2274	-0.255347	25.5347
Telomere Length	Lung Never Smokers	rs35902944	0.648478	0.173246	0.000181754	3.74311	-9.16579	-0.0795341	7.95341	-0.0916579	9.16579
Telomere Length	Lung Never Smokers	rs12638862	0.75418	0.179326	2.6e-05	4.20564	2.0584	0.0705008	7.05008	0.020584	2.0584
Telomere Length	Lung Never Smokers	rs9419958	0.660799	0.176021	0.000173976	3.75408	-8.89958	-0.0620455	6.20455	-0.0889958	8.89958
Telomere Length	Lung Never Smokers	rs35640778	0.664112	0.174216	0.000137851	3.81199	-7.49433	-0.057344	5.7344	-0.0749433	7.49433
Telomere Length	Lung Never Smokers	rs2303262	0.667488	0.17266	0.00011068	3.8659	-6.18613	-0.0525519	5.25519	-0.0618613	6.18613
Telomere Length	Lung Never Smokers	rs2056726	0.739832	0.167881	1.05e-05	4.40687	6.94169	0.0501358	5.01358	0.0694169	6.94169
Telomere Length	Lung Never Smokers	rs115610405	0.672656	0.170451	7.94e-05	3.94634	-4.23419	-0.0452154	4.52154	-0.0423419	4.23419
Telomere Length	Lung Never Smokers	rs76666449	0.733365	0.168755	1.39e-05	4.34573	5.45794	0.0409553	4.09553	0.0545794	5.45794
Telomere Length	Lung Never Smokers	rs17464525	0.676298	0.170934	7.61e-05	3.95648	-3.98816	-0.040047	4.0047	-0.0398816	3.98816
Telomere Length	Lung Never Smokers	rs61748181	0.731345	0.169642	1.62e-05	4.31111	4.61784	0.038089	3.8089	0.0461784	4.61784
Telomere Length	Lung Never Smokers	rs2276182	0.680534	0.170947	6.86e-05	3.98097	-3.39376	-0.0340334	3.40334	-0.0339376	3.39376
Telomere Length	Lung Never Smokers	rs965109	0.72452	0.172352	2.63e-05	4.20373	2.01195	0.0284017	2.84017	0.0201195	2.01195
Telomere Length	Lung Never Smokers	rs6584607	0.684608	0.16713	4.2e-05	4.09625	-0.596202	-0.0282514	2.82514	-0.00596203	0.596203
Telomere Length	Lung Never Smokers	rs76219171	0.723836	0.170159	2.1e-05	4.25389	3.22927	0.0274303	2.74303	0.0322927	3.22927
Telomere Length	Lung Never Smokers	rs10905255	0.722935	0.170591	2.26e-05	4.23781	2.83911	0.0261507	2.61507	0.0283911	2.83911
Telomere Length	Lung Never Smokers	rs3757387	0.722707	0.171125	2.41e-05	4.22326	2.48588	0.0258272	2.58272	0.0248588	2.48588
Telomere Length	Lung Never Smokers	rs115451758	0.687139	0.169906	5.25e-05	4.04424	-1.85841	-0.0246585	2.46585	-0.0185841	1.85841
Telomere Length	Lung Never Smokers	rs12412214	0.720844	0.171565	2.65e-05	4.20158	1.95988	0.0231827	2.31827	0.0195988	1.95988
Telomere Length	Lung Never Smokers	rs1332941	0.720796	0.171042	2.51e-05	4.21415	2.26483	0.0231153	2.31153	0.0226483	2.26483
Telomere Length	Lung Never Smokers	rs7218033	0.688406	0.171228	5.81e-05	4.0204	-2.43691	-0.0228606	2.28606	-0.0243691	2.43691
Telomere Length	Lung Never Smokers	rs4362428	0.720545	0.169262	2.07e-05	4.25697	3.30404	0.0227591	2.27591	0.0330404	3.30404
Telomere Length	Lung Never Smokers	rs17803849	0.720445	0.172152	2.85e-05	4.18493	1.55572	0.0226166	2.26166	0.0155572	1.55572
Telomere Length	Lung Never Smokers	rs1985369	0.689291	0.171175	5.65e-05	4.02683	-2.28091	-0.0216034	2.16034	-0.0228091	2.28091
Telomere Length	Lung Never Smokers	rs11190184	0.719385	0.170649	2.49e-05	4.21559	2.29968	0.0211125	2.11125	0.0229968	2.29968
Telomere Length	Lung Never Smokers	rs11646283	0.719298	0.17066	2.5e-05	4.21479	2.28046	0.0209882	2.09882	0.0228046	2.28046
Telomere Length	Lung Never Smokers	rs10112752	0.689844	0.172366	6.28e-05	4.0022	-2.87854	-0.0208192	2.08192	-0.0287854	2.87854
Telomere Length	Lung Never Smokers	rs11557154	0.689975	0.171847	5.94e-05	4.01504	-2.56693	-0.0206334	2.06334	-0.0256693	2.56693
Telomere Length	Lung Never Smokers	rs8088824	0.718951	0.171693	2.82e-05	4.18743	1.61653	0.0204966	2.04966	0.0161653	1.61653
Telomere Length	Lung Never Smokers	rs3768321	0.690592	0.170127	4.92e-05	4.05926	-1.49378	-0.0197566	1.97566	-0.0149378	1.49378
Telomere Length	Lung Never Smokers	rs4724	0.690645	0.17309	6.6e-05	3.9901	-3.17226	-0.0196813	1.96813	-0.0317226	3.17226
Telomere Length	Lung Never Smokers	rs6776756	0.718282	0.171129	2.7e-05	4.19731	1.85629	0.0195474	1.95474	0.0185629	1.85629
Telomere Length	Lung Never Smokers	rs3891167	0.690792	0.172949	6.49e-05	3.99419	-3.07301	-0.0194732	1.94732	-0.0307301	3.07301
Telomere Length	Lung Never Smokers	rs6873104	0.718199	0.170763	2.6e-05	4.20583	2.06293	0.0194291	1.94291	0.0206293	2.06293
Telomere Length	Lung Never Smokers	rs8102497	0.71797	0.170808	2.63e-05	4.20337	2.0032	0.0191043	1.91043	0.020032	2.0032
Telomere Length	Lung Never Smokers	rs6007020	0.691179	0.170712	5.15e-05	4.04879	-1.7479	-0.0189245	1.89245	-0.017479	1.7479
Telomere Length	Lung Never Smokers	rs145114957	0.69139	0.169682	4.61e-05	4.07462	-1.12109	-0.0186247	1.86247	-0.0112109	1.12109
Telomere Length	Lung Never Smokers	rs4498805	0.717402	0.170969	2.72e-05	4.19609	1.82667	0.018297	1.8297	0.0182667	1.82667
Telomere Length	Lung Never Smokers	rs62207005	0.717321	0.171742	2.96e-05	4.17673	1.35666	0.0181825	1.81825	0.0135666	1.35666
Telomere Length	Lung Never Smokers	rs2738775	0.71712	0.170661	2.65e-05	4.20201	1.97026	0.0178973	1.78973	0.0197026	1.97026
Telomere Length	Lung Never Smokers	rs939916	0.717004	0.171882	3.03e-05	4.17149	1.22967	0.0177321	1.77321	0.0122967	1.22967
Telomere Length	Lung Never Smokers	rs2293579	0.716852	0.170561	2.64e-05	4.20291	1.99203	0.0175168	1.75168	0.0199203	1.99203
Telomere Length	Lung Never Smokers	rs8051249	0.716346	0.17018	2.56e-05	4.20936	2.14855	0.0167993	1.67993	0.0214855	2.14855
Telomere Length	Lung Never Smokers	rs10840270	0.716257	0.170937	2.79e-05	4.19018	1.68305	0.0166726	1.66726	0.0168305	1.68305
Telomere Length	Lung Never Smokers	rs10851590	0.716118	0.170362	2.63e-05	4.20351	2.00673	0.0164751	1.64751	0.0200673	2.00673
Telomere Length	Lung Never Smokers	rs2069536	0.716108	0.170744	2.74e-05	4.19403	1.77668	0.0164602	1.64602	0.0177668	1.77668
Telomere Length	Lung Never Smokers	rs7209057	0.716092	0.170479	2.66e-05	4.20046	1.93273	0.0164388	1.64388	0.0193273	1.93273
Telomere Length	Lung Never Smokers	rs3093888	0.71566	0.171003	2.85e-05	4.18507	1.55904	0.0158248	1.58248	0.0155904	1.55904
Telomere Length	Lung Never Smokers	rs2282764	0.715602	0.171362	2.97e-05	4.17598	1.33846	0.0157427	1.57427	0.0133846	1.33846
Telomere Length	Lung Never Smokers	rs6565924	0.715303	0.170844	2.83e-05	4.18688	1.60303	0.0153179	1.53179	0.0160303	1.60303
Telomere Length	Lung Never Smokers	rs112394943	0.715284	0.170816	2.82e-05	4.18746	1.61706	0.0152917	1.52917	0.0161706	1.61706
Telomere Length	Lung Never Smokers	rs12572897	0.715281	0.171856	3.15e-05	4.16209	1.00157	0.0152874	1.52874	0.0100157	1.00157
Telomere Length	Lung Never Smokers	rs75664430	0.693826	0.171794	5.37e-05	4.0387	-1.99288	-0.0151673	1.51673	-0.0199288	1.99288
Telomere Length	Lung Never Smokers	rs6669563	0.715193	0.171563	3.06e-05	4.16869	1.16175	0.0151623	1.51623	0.0116175	1.16175
Telomere Length	Lung Never Smokers	rs6751209	0.694489	0.170761	4.76e-05	4.06701	-1.30573	-0.0142258	1.42258	-0.0130573	1.30573
Telomere Length	Lung Never Smokers	rs10150625	0.694677	0.170644	4.68e-05	4.07091	-1.21108	-0.0139584	1.39584	-0.0121108	1.21108
Telomere Length	Lung Never Smokers	rs4660456	0.695095	0.170963	4.79e-05	4.06577	-1.33597	-0.0133651	1.33651	-0.0133597	1.33597
Telomere Length	Lung Never Smokers	rs117630647	0.713717	0.171406	3.13e-05	4.16389	1.04526	0.0130677	1.30677	0.0104526	1.04526
Telomere Length	Lung Never Smokers	rs146546514	0.69536	0.172138	5.36e-05	4.03955	-1.97211	-0.0129897	1.29897	-0.0197211	1.97211
Telomere Length	Lung Never Smokers	rs762679	0.695684	0.172052	5.27e-05	4.04344	-1.87768	-0.0125291	1.25291	-0.0187768	1.87768
Telomere Length	Lung Never Smokers	rs4695407	0.71316	0.171379	3.16e-05	4.16129	0.982191	0.0122759	1.22759	0.00982191	0.982191
Telomere Length	Lung Never Smokers	rs1003322	0.712862	0.171025	3.07e-05	4.16817	1.14897	0.0118528	1.18528	0.0114897	1.14897
Telomere Length	Lung Never Smokers	rs71593392	0.712851	0.17092	3.04e-05	4.17068	1.21001	0.0118383	1.18383	0.0121001	1.21001
Telomere Length	Lung Never Smokers	rs6659669	0.712756	0.171121	3.11e-05	4.16521	1.0773	0.0117028	1.17028	0.010773	1.0773
Telomere Length	Lung Never Smokers	rs145170152	0.696276	0.171087	4.71e-05	4.06973	-1.23976	-0.0116887	1.16887	-0.0123976	1.23976
Telomere Length	Lung Never Smokers	rs11746381	0.71271	0.171404	3.21e-05	4.15807	0.904031	0.0116372	1.16372	0.00904031	0.904031
Telomere Length	Lung Never Smokers	rs5742915	0.696484	0.171881	5.08e-05	4.05212	-1.6672	-0.0113941	1.13941	-0.016672	1.6672
Telomere Length	Lung Never Smokers	rs9398196	0.712462	0.171477	3.26e-05	4.15484	0.825681	0.0112851	1.12851	0.00825681	0.825681
Telomere Length	Lung Never Smokers	rs12941945	0.696637	0.171855	5.04e-05	4.05363	-1.63051	-0.0111774	1.11774	-0.0163051	1.63051
Telomere Length	Lung Never Smokers	rs61818036	0.712021	0.171511	3.3e-05	4.15145	0.743343	0.0106602	1.06602	0.00743343	0.743343
Telomere Length	Lung Never Smokers	rs13129697	0.69706	0.17161	4.87e-05	4.06189	-1.43009	-0.010577	1.0577	-0.0143009	1.43009
Telomere Length	Lung Never Smokers	rs117469989	0.711906	0.171169	3.2e-05	4.15909	0.928673	0.0104958	1.04958	0.00928673	0.928673
Telomere Length	Lung Never Smokers	rs112625468	0.711334	0.171627	3.4e-05	4.14466	0.578451	0.00968501	0.968501	0.00578451	0.578451
Telomere Length	Lung Never Smokers	rs4919611	0.711315	0.171802	3.47e-05	4.14031	0.473038	0.00965726	0.965726	0.00473038	0.473038
Telomere Length	Lung Never Smokers	rs932002	0.697738	0.172717	5.35e-05	4.03978	-1.9667	-0.00961461	0.961461	-0.019667	1.9667
Telomere Length	Lung Never Smokers	rs2230590	0.711282	0.171692	3.43e-05	4.14277	0.532585	0.00961035	0.961035	0.00532585	0.532584
Telomere Length	Lung Never Smokers	rs10773176	0.711048	0.171658	3.44e-05	4.14225	0.520031	0.00927926	0.927926	0.0052003	0.52003
Telomere Length	Lung Never Smokers	rs1980240	0.710911	0.171456	3.38e-05	4.14632	0.618875	0.00908473	0.908473	0.00618875	0.618875
Telomere Length	Lung Never Smokers	rs80324517	0.710687	0.171795	3.52e-05	4.13684	0.388756	0.00876551	0.876552	0.00388756	0.388756
Telomere Length	Lung Never Smokers	rs17185038	0.710654	0.17134	3.36e-05	4.14761	0.650204	0.00871934	0.871934	0.00650204	0.650204
Telomere Length	Lung Never Smokers	rs72801474	0.71043	0.17122	3.34e-05	4.14923	0.689437	0.00840144	0.840144	0.00689437	0.689437
Telomere Length	Lung Never Smokers	rs138420497	0.710149	0.171704	3.54e-05	4.13589	0.365615	0.00800237	0.800236	0.00365615	0.365615
Telomere Length	Lung Never Smokers	rs11769630	0.698907	0.17152	4.61e-05	4.07478	-1.11717	-0.00795476	0.795476	-0.0111717	1.11717
Telomere Length	Lung Never Smokers	rs8105767	0.699029	0.172788	5.22e-05	4.04558	-1.82588	-0.00778207	0.778206	-0.0182588	1.82588
Telomere Length	Lung Never Smokers	rs12615793	0.699034	0.172854	5.25e-05	4.04407	-1.86248	-0.00777433	0.777433	-0.0186248	1.86248
Telomere Length	Lung Never Smokers	rs871134	0.709953	0.171916	3.63e-05	4.12966	0.214457	0.00772462	0.772462	0.00214457	0.214457
Telomere Length	Lung Never Smokers	rs9600019	0.709783	0.171506	3.5e-05	4.13852	0.429563	0.00748337	0.748338	0.00429562	0.429562
Telomere Length	Lung Never Smokers	rs111527438	0.709563	0.171516	3.52e-05	4.13701	0.392784	0.00717081	0.717081	0.00392783	0.392783
Telomere Length	Lung Never Smokers	rs10845387	0.709247	0.17152	3.55e-05	4.13507	0.34581	0.00672202	0.672202	0.0034581	0.34581
Telomere Length	Lung Never Smokers	rs34003787	0.709129	0.171641	3.6e-05	4.13148	0.258648	0.00655481	0.655481	0.00258648	0.258648
Telomere Length	Lung Never Smokers	rs1881985	0.699911	0.171772	4.61e-05	4.07464	-1.1206	-0.00652962	0.652962	-0.011206	1.1206
Telomere Length	Lung Never Smokers	rs13062095	0.709039	0.171643	3.61e-05	4.13089	0.244248	0.00642658	0.642658	0.00244248	0.244248
Telomere Length	Lung Never Smokers	rs79127610	0.708909	0.171842	3.7e-05	4.12536	0.110114	0.00624247	0.624247	0.00110114	0.110114
Telomere Length	Lung Never Smokers	rs80150989	0.700131	0.171539	4.48e-05	4.08146	-0.95526	-0.00621755	0.621755	-0.00955261	0.955261
Telomere Length	Lung Never Smokers	rs11579626	0.708878	0.171791	3.68e-05	4.1264	0.135468	0.00619905	0.619904	0.00135468	0.135468
Telomere Length	Lung Never Smokers	rs1609812	0.700221	0.173163	5.26e-05	4.0437	-1.87147	-0.0060895	0.60895	-0.0187147	1.87147
Telomere Length	Lung Never Smokers	rs1907702	0.708669	0.17162	3.64e-05	4.1293	0.205777	0.00590191	0.590191	0.00205777	0.205777
Telomere Length	Lung Never Smokers	rs6590343	0.708665	0.171619	3.64e-05	4.12928	0.205408	0.0058962	0.589621	0.00205407	0.205407
Telomere Length	Lung Never Smokers	rs139795227	0.700503	0.171652	4.49e-05	4.08095	-0.967648	-0.00568969	0.568969	-0.00967648	0.967648
Telomere Length	Lung Never Smokers	rs1023767	0.708305	0.171877	3.77e-05	4.12099	0.00415303	0.00538497	0.538497	4.15e-05	0.00415307
Telomere Length	Lung Never Smokers	rs7790856	0.708215	0.173775	4.59e-05	4.07547	-1.10043	0.00525723	0.525723	-0.0110043	1.10043
Telomere Length	Lung Never Smokers	rs7012816	0.708106	0.171663	3.71e-05	4.12498	0.100836	0.00510199	0.510199	0.00100836	0.100836
Telomere Length	Lung Never Smokers	rs114719295	0.700954	0.171653	4.44e-05	4.08355	-0.904469	-0.00504904	0.504904	-0.00904469	0.904469
Telomere Length	Lung Never Smokers	rs2081601	0.708063	0.171628	3.7e-05	4.12558	0.115454	0.00504165	0.504165	0.00115454	0.115454
Telomere Length	Lung Never Smokers	rs183553155	0.701172	0.171784	4.47e-05	4.0817	-0.949407	-0.00474032	0.474032	-0.00949407	0.949407
Telomere Length	Lung Never Smokers	rs429358	0.707826	0.171644	3.73e-05	4.12381	0.0725569	0.00470463	0.470463	0.000725566	0.0725566
Telomere Length	Lung Never Smokers	rs13230646	0.707666	0.171826	3.81e-05	4.1185	-0.0562275	0.00447795	0.447795	-0.000562274	0.0562274
Telomere Length	Lung Never Smokers	rs10024820	0.701357	0.171771	4.44e-05	4.08309	-0.915497	-0.0044764	0.44764	-0.00915497	0.915497
Telomere Length	Lung Never Smokers	rs10808899	0.701373	0.172059	4.57e-05	4.07636	-1.079	-0.00445406	0.445406	-0.01079	1.079
Telomere Length	Lung Never Smokers	rs35671754	0.70147	0.171664	4.38e-05	4.0863	-0.837635	-0.00431592	0.431592	-0.00837635	0.837635
Telomere Length	Lung Never Smokers	rs139897613	0.701478	0.171737	4.42e-05	4.0846	-0.878878	-0.00430543	0.430543	-0.00878878	0.878878
Telomere Length	Lung Never Smokers	rs6054257	0.701631	0.171654	4.36e-05	4.08747	-0.809408	-0.00408875	0.408875	-0.00809409	0.809409
Telomere Length	Lung Never Smokers	rs4530278	0.70738	0.171773	3.82e-05	4.1181	-0.0659157	0.00407215	0.407215	-0.000659158	0.0659158
Telomere Length	Lung Never Smokers	rs113800756	0.701662	0.171661	4.36e-05	4.08748	-0.809092	-0.00404386	0.404386	-0.00809092	0.809092
Telomere Length	Lung Never Smokers	rs1291143	0.701679	0.173259	5.12e-05	4.04988	-1.7216	-0.00402015	0.402015	-0.017216	1.7216
Telomere Length	Lung Never Smokers	rs9878436	0.701697	0.171802	4.42e-05	4.08434	-0.885242	-0.00399443	0.399443	-0.00885242	0.885242
Telomere Length	Lung Never Smokers	rs144204502	0.701744	0.172205	4.6e-05	4.07505	-1.11061	-0.00392778	0.392778	-0.0111061	1.11061
Telomere Length	Lung Never Smokers	rs75683534	0.70688	0.171602	3.8e-05	4.11931	-0.03674	0.003362	0.3362	-0.0003674	0.03674
Telomere Length	Lung Never Smokers	rs11866592	0.706848	0.172303	4.09e-05	4.10235	-0.448265	0.00331657	0.331658	-0.00448265	0.448265
Telomere Length	Lung Never Smokers	rs73581419	0.706845	0.171813	3.89e-05	4.11404	-0.164536	0.00331328	0.331328	-0.00164536	0.164536
Telomere Length	Lung Never Smokers	rs76883411	0.706789	0.171699	3.85e-05	4.11643	-0.106496	0.0032334	0.32334	-0.00106496	0.106496
Telomere Length	Lung Never Smokers	rs41304832	0.702295	0.171767	4.34e-05	4.08865	-0.780623	-0.00314604	0.314604	-0.00780623	0.780623
Telomere Length	Lung Never Smokers	rs117962821	0.702388	0.171656	4.28e-05	4.09183	-0.703422	-0.00301328	0.301328	-0.00703422	0.703422
Telomere Length	Lung Never Smokers	rs7101497	0.702453	0.171862	4.36e-05	4.08731	-0.813229	-0.00292186	0.292186	-0.0081323	0.81323
Telomere Length	Lung Never Smokers	rs28502153	0.702524	0.172181	4.5e-05	4.08016	-0.986664	-0.00281996	0.281996	-0.00986664	0.986664
Telomere Length	Lung Never Smokers	rs66731853	0.70265	0.171931	4.37e-05	4.08681	-0.825369	-0.00264121	0.264121	-0.00825369	0.825369
Telomere Length	Lung Never Smokers	rs76374777	0.706124	0.171723	3.92e-05	4.112	-0.213941	0.00228882	0.228882	-0.00213941	0.213941
Telomere Length	Lung Never Smokers	rs12369950	0.703225	0.171772	4.24e-05	4.09394	-0.652405	-0.00182581	0.182581	-0.00652405	0.652405
Telomere Length	Lung Never Smokers	rs1727302	0.703277	0.171997	4.33e-05	4.08889	-0.774774	-0.00175114	0.175113	-0.00774774	0.774774
Telomere Length	Lung Never Smokers	rs4743037	0.703351	0.171761	4.22e-05	4.09493	-0.628199	-0.00164653	0.164653	-0.00628199	0.628199
Telomere Length	Lung Never Smokers	rs41269079	0.705637	0.171766	3.99e-05	4.10812	-0.308194	0.00159824	0.159824	-0.00308194	0.308194
Telomere Length	Lung Never Smokers	rs8053839	0.703387	0.171786	4.23e-05	4.09456	-0.637369	-0.00159522	0.159522	-0.00637369	0.637369
Telomere Length	Lung Never Smokers	rs17445108	0.703659	0.171682	4.16e-05	4.09863	-0.538512	-0.00120925	0.120925	-0.00538512	0.538512
Telomere Length	Lung Never Smokers	rs17677991	0.703755	0.172195	4.37e-05	4.08696	-0.821693	-0.00107336	0.107336	-0.00821693	0.821693
Telomere Length	Lung Never Smokers	rs2977608	0.705256	0.171647	3.98e-05	4.10876	-0.292602	0.00105735	0.105735	-0.00292602	0.292602
Telomere Length	Lung Never Smokers	rs182059586	0.703827	0.171715	4.15e-05	4.0988	-0.534312	-0.000970953	0.0970953	-0.00534312	0.534312
Telomere Length	Lung Never Smokers	rs117238689	0.705118	0.172003	4.14e-05	4.09945	-0.518648	0.000861213	0.0861213	-0.00518649	0.518649
Telomere Length	Lung Never Smokers	rs139122544	0.703906	0.171805	4.18e-05	4.09712	-0.575028	-0.000859024	0.0859024	-0.00575028	0.575029
Telomere Length	Lung Never Smokers	rs75544730	0.705116	0.171791	4.05e-05	4.10449	-0.396262	0.000858263	0.0858263	-0.00396262	0.396262
Telomere Length	Lung Never Smokers	rs11085072	0.703951	0.171737	4.15e-05	4.09901	-0.529382	-0.000794598	0.0794598	-0.00529382	0.529382
Telomere Length	Lung Never Smokers	rs28711261	0.704877	0.171737	4.05e-05	4.1044	-0.398527	0.000519502	0.0519502	-0.00398527	0.398527
Telomere Length	Lung Never Smokers	rs869785	0.704751	0.171839	4.11e-05	4.10123	-0.475498	0.000340849	0.0340849	-0.00475498	0.475498
Telomere Length	Lung Never Smokers	rs12613375	0.704606	0.171802	4.11e-05	4.10126	-0.474559	0.000134077	0.0134077	-0.00474559	0.474559
Telomere Length	Lung Never Smokers	All	0.704511	0.170964	3.78e-05	4.12082	NA	0	0	1.08e-15	1.08e-13
Telomere Length	Lung Small Cell Carcinoma	rs7705526	0.0672553	0.133018	0.613129	0.505612	-94.6064	-0.44253	44.253	-0.462747	46.2747
Telomere Length	Lung Small Cell Carcinoma	rs4724	0.0877732	0.128265	0.49378	0.684309	-92.7001	-0.27246	27.246	-0.272866	27.2866
Telomere Length	Lung Small Cell Carcinoma	rs115610405	0.149907	0.128089	0.241869	1.17033	-87.5155	0.242554	24.2554	0.243569	24.3569
Telomere Length	Lung Small Cell Carcinoma	rs12638862	0.092082	0.134681	0.494163	0.683702	-92.7066	-0.236745	23.6745	-0.273512	27.3512
Telomere Length	Lung Small Cell Carcinoma	rs35640778	0.0927244	0.130734	0.478162	0.709262	-92.4339	-0.231421	23.1421	-0.246352	24.6352
Telomere Length	Lung Small Cell Carcinoma	rs3891167	0.0936656	0.128697	0.466736	0.727801	-92.2362	-0.223619	22.3619	-0.226653	22.6653
Telomere Length	Lung Small Cell Carcinoma	rs1609812	0.146931	0.128886	0.254284	1.14001	-87.839	0.217892	21.7892	0.211347	21.1347
Telomere Length	Lung Small Cell Carcinoma	rs35902944	0.0948398	0.130576	0.467642	0.726321	-92.2519	-0.213886	21.3886	-0.228225	22.8225
Telomere Length	Lung Small Cell Carcinoma	rs939916	0.0965676	0.127135	0.447515	0.759565	-91.8973	-0.199565	19.9565	-0.192901	19.2901
Telomere Length	Lung Small Cell Carcinoma	rs75664430	0.142382	0.127178	0.262907	1.11955	-88.0572	0.180181	18.0181	0.189609	18.9609
Telomere Length	Lung Small Cell Carcinoma	rs11866592	0.142112	0.127843	0.266307	1.11161	-88.1419	0.177943	17.7943	0.181171	18.1171
Telomere Length	Lung Small Cell Carcinoma	rs112625468	0.140671	0.125859	0.263701	1.11769	-88.0771	0.166004	16.6004	0.187631	18.7631
Telomere Length	Lung Small Cell Carcinoma	rs144204502	0.139223	0.128334	0.277989	1.08485	-88.4274	0.153996	15.3996	0.152738	15.2738
Telomere Length	Lung Small Cell Carcinoma	rs11579626	0.13848	0.126521	0.273728	1.09452	-88.3242	0.147838	14.7838	0.163012	16.3012
Telomere Length	Lung Small Cell Carcinoma	rs12941945	0.103082	0.127538	0.418949	0.808247	-91.378	-0.145569	14.5569	-0.141173	14.1173
Telomere Length	Lung Small Cell Carcinoma	rs429358	0.135848	0.125711	0.279858	1.08064	-88.4722	0.126028	12.6028	0.148266	14.8266
Telomere Length	Lung Small Cell Carcinoma	rs2230590	0.135759	0.127396	0.286584	1.06564	-88.6322	0.125284	12.5284	0.132334	13.2334
Telomere Length	Lung Small Cell Carcinoma	rs76666449	0.135041	0.127986	0.291369	1.05512	-88.7444	0.119334	11.9334	0.121153	12.1153
Telomere Length	Lung Small Cell Carcinoma	rs965109	0.106328	0.129643	0.412124	0.820161	-91.2509	-0.118664	11.8664	-0.128513	12.8513
Telomere Length	Lung Small Cell Carcinoma	rs10773176	0.134587	0.12742	0.290856	1.05625	-88.7325	0.115573	11.5573	0.122346	12.2346
Telomere Length	Lung Small Cell Carcinoma	rs10024820	0.134538	0.127178	0.290112	1.05788	-88.7151	0.115167	11.5167	0.124078	12.4078
Telomere Length	Lung Small Cell Carcinoma	rs2056726	0.106937	0.12816	0.404055	0.834401	-91.099	-0.113618	11.3618	-0.113381	11.3381
Telomere Length	Lung Small Cell Carcinoma	rs139897613	0.107148	0.127182	0.39952	0.842478	-91.0128	-0.111865	11.1865	-0.104799	10.4799
Telomere Length	Lung Small Cell Carcinoma	rs11557154	0.13375	0.12873	0.298804	1.039	-88.9164	0.108637	10.8637	0.104023	10.4023
Telomere Length	Lung Small Cell Carcinoma	rs61748181	0.133273	0.128377	0.299203	1.03814	-88.9256	0.104684	10.4684	0.103112	10.3112
Telomere Length	Lung Small Cell Carcinoma	rs4743037	0.132607	0.127176	0.297085	1.0427	-88.8769	0.0991628	9.91628	0.107958	10.7958
Telomere Length	Lung Small Cell Carcinoma	rs117630647	0.108914	0.128089	0.395156	0.850305	-90.9293	-0.0972245	9.72245	-0.0964826	9.64826
Telomere Length	Lung Small Cell Carcinoma	rs1023767	0.10905	0.128075	0.394516	0.851456	-90.9171	-0.0960968	9.60968	-0.0952593	9.52593
Telomere Length	Lung Small Cell Carcinoma	rs12615793	0.109227	0.129461	0.398836	0.843703	-90.9998	-0.0946358	9.46358	-0.103498	10.3498
Telomere Length	Lung Small Cell Carcinoma	rs7218033	0.10941	0.12847	0.394414	0.85164	-90.9151	-0.0931127	9.31127	-0.0950643	9.50643
Telomere Length	Lung Small Cell Carcinoma	rs1727302	0.109482	0.128252	0.393302	0.853645	-90.8937	-0.0925198	9.25198	-0.0929338	9.29338
Telomere Length	Lung Small Cell Carcinoma	rs28502153	0.131773	0.128646	0.305689	1.02431	-89.0731	0.0922481	9.22481	0.0884108	8.84108
Telomere Length	Lung Small Cell Carcinoma	rs6776756	0.131721	0.128234	0.304328	1.0272	-89.0424	0.0918183	9.18183	0.0914786	9.14785
Telomere Length	Lung Small Cell Carcinoma	rs5742915	0.109768	0.128503	0.392988	0.854211	-90.8877	-0.0901464	9.01464	-0.0923323	9.23323
Telomere Length	Lung Small Cell Carcinoma	rs61818036	0.110275	0.127971	0.388844	0.861716	-90.8076	-0.0859474	8.59474	-0.0843574	8.43574
Telomere Length	Lung Small Cell Carcinoma	rs762679	0.110492	0.128819	0.391044	0.857725	-90.8502	-0.0841507	8.41507	-0.0885975	8.85975
Telomere Length	Lung Small Cell Carcinoma	rs6565924	0.129878	0.127903	0.309897	1.01544	-89.1678	0.0765395	7.65395	0.0789857	7.89856
Telomere Length	Lung Small Cell Carcinoma	rs79127610	0.129826	0.128174	0.311114	1.01289	-89.195	0.0761094	7.61094	0.0762749	7.62749
Telomere Length	Lung Small Cell Carcinoma	rs12412214	0.129728	0.128925	0.314304	1.00623	-89.266	0.0753003	7.53003	0.0692034	6.92034
Telomere Length	Lung Small Cell Carcinoma	rs80150989	0.111584	0.127752	0.382423	0.87344	-90.6825	-0.0750963	7.50963	-0.0718991	7.18991
Telomere Length	Lung Small Cell Carcinoma	rs17803849	0.111616	0.129235	0.387772	0.863665	-90.7868	-0.0748328	7.48328	-0.0822867	8.22867
Telomere Length	Lung Small Cell Carcinoma	rs10905255	0.129647	0.128535	0.313142	1.00865	-89.2402	0.0746256	7.46256	0.0717738	7.17738
Telomere Length	Lung Small Cell Carcinoma	rs3093888	0.111744	0.128115	0.383091	0.872216	-90.6956	-0.0737705	7.37705	-0.0732003	7.32003
Telomere Length	Lung Small Cell Carcinoma	rs1881985	0.129363	0.128237	0.313078	1.00878	-89.2388	0.0722727	7.22727	0.0719141	7.19141
Telomere Length	Lung Small Cell Carcinoma	rs2282764	0.129327	0.12846	0.314056	1.00675	-89.2605	0.0719744	7.19744	0.0697505	6.97505
Telomere Length	Lung Small Cell Carcinoma	rs9600019	0.129264	0.127915	0.312233	1.01055	-89.22	0.0714517	7.14517	0.0737877	7.37877
Telomere Length	Lung Small Cell Carcinoma	rs1291143	0.112133	0.129862	0.387872	0.863482	-90.7888	-0.0705417	7.05417	-0.0824807	8.24807
Telomere Length	Lung Small Cell Carcinoma	rs138420497	0.112253	0.128222	0.381321	0.875465	-90.6609	-0.0695471	6.95471	-0.069748	6.9748
Telomere Length	Lung Small Cell Carcinoma	rs71593392	0.128762	0.127719	0.313375	1.00816	-89.2454	0.0672912	6.72912	0.0712564	7.12564
Telomere Length	Lung Small Cell Carcinoma	rs6659669	0.128591	0.128	0.315079	1.00462	-89.2832	0.0658737	6.58737	0.0674906	6.74906
Telomere Length	Lung Small Cell Carcinoma	rs145170152	0.128507	0.127736	0.314398	1.00604	-89.2681	0.0651748	6.51748	0.068996	6.8996
Telomere Length	Lung Small Cell Carcinoma	rs12369950	0.112988	0.128126	0.37786	0.881845	-90.5929	-0.0634616	6.34616	-0.062968	6.2968
Telomere Length	Lung Small Cell Carcinoma	rs2293579	0.128045	0.128234	0.318027	0.99852	-89.3483	0.0613438	6.13438	0.0610081	6.10081
Telomere Length	Lung Small Cell Carcinoma	rs113800756	0.11328	0.128073	0.376431	0.884491	-90.5647	-0.0610413	6.10413	-0.0601574	6.01574
Telomere Length	Lung Small Cell Carcinoma	rs114719295	0.127861	0.128184	0.31853	0.997484	-89.3593	0.0598235	5.98235	0.0599072	5.99072
Telomere Length	Lung Small Cell Carcinoma	rs182059586	0.113641	0.12797	0.374526	0.888028	-90.5269	-0.0580467	5.80467	-0.0563983	5.63983
Telomere Length	Lung Small Cell Carcinoma	rs17677991	0.113792	0.128958	0.37756	0.8824	-90.587	-0.056791	5.6791	-0.0623787	6.23787
Telomere Length	Lung Small Cell Carcinoma	rs871134	0.113962	0.128762	0.376125	0.885059	-90.5586	-0.0553883	5.53883	-0.0595534	5.95534
Telomere Length	Lung Small Cell Carcinoma	rs34003787	0.127305	0.128322	0.32116	0.992076	-89.417	0.0552114	5.52114	0.0541609	5.41609
Telomere Length	Lung Small Cell Carcinoma	rs4919611	0.11404	0.128686	0.375517	0.886187	-90.5466	-0.0547416	5.47416	-0.058355	5.8355
Telomere Length	Lung Small Cell Carcinoma	rs4362428	0.127207	0.128239	0.321223	0.991949	-89.4184	0.0543995	5.43995	0.0540254	5.40254
Telomere Length	Lung Small Cell Carcinoma	rs7012816	0.127134	0.128337	0.321867	0.990629	-89.4324	0.053795	5.3795	0.052623	5.2623
Telomere Length	Lung Small Cell Carcinoma	rs17445108	0.127055	0.127972	0.320792	0.992831	-89.4089	0.0531391	5.31391	0.0549633	5.49633
Telomere Length	Lung Small Cell Carcinoma	rs10851590	0.126808	0.128269	0.322854	0.98861	-89.454	0.0510941	5.10941	0.050478	5.0478
Telomere Length	Lung Small Cell Carcinoma	rs11646283	0.126784	0.128608	0.324223	0.985816	-89.4838	0.050896	5.0896	0.047509	4.7509
Telomere Length	Lung Small Cell Carcinoma	rs76374777	0.126695	0.128241	0.323181	0.987942	-89.4611	0.0501552	5.01552	0.0497675	4.97675
Telomere Length	Lung Small Cell Carcinoma	rs10150625	0.126432	0.1283	0.32441	0.985435	-89.4878	0.0479737	4.79737	0.0471043	4.71043
Telomere Length	Lung Small Cell Carcinoma	rs80324517	0.126378	0.128756	0.32633	0.981534	-89.5295	0.0475296	4.75296	0.042959	4.2959
Telomere Length	Lung Small Cell Carcinoma	rs1332941	0.115002	0.128846	0.372094	0.892557	-90.4786	-0.0467631	4.67631	-0.0515859	5.15859
Telomere Length	Lung Small Cell Carcinoma	rs2081601	0.115195	0.128424	0.369723	0.896992	-90.4313	-0.0451648	4.51648	-0.0468739	4.68739
Telomere Length	Lung Small Cell Carcinoma	rs12572897	0.115321	0.128996	0.371325	0.893995	-90.4633	-0.0441176	4.41176	-0.0500586	5.00586
Telomere Length	Lung Small Cell Carcinoma	rs4660456	0.125856	0.128464	0.327235	0.979699	-89.549	0.0431997	4.31997	0.0410093	4.10093
Telomere Length	Lung Small Cell Carcinoma	rs2738775	0.125854	0.12858	0.327678	0.978801	-89.5586	0.0431872	4.31872	0.0400554	4.00554
Telomere Length	Lung Small Cell Carcinoma	rs11190184	0.125696	0.128708	0.328769	0.976597	-89.5821	0.041877	4.1877	0.037713	3.7713
Telomere Length	Lung Small Cell Carcinoma	rs6873104	0.115834	0.12867	0.367993	0.90024	-90.3967	-0.0398674	3.98674	-0.0434227	4.34227
Telomere Length	Lung Small Cell Carcinoma	rs9419958	0.115919	0.132331	0.381039	0.875983	-90.6554	-0.0391604	3.91605	-0.0691973	6.91973
Telomere Length	Lung Small Cell Carcinoma	rs4695407	0.116006	0.128675	0.367299	0.901544	-90.3827	-0.0384447	3.84447	-0.0420368	4.20368
Telomere Length	Lung Small Cell Carcinoma	rs11085072	0.12502	0.12851	0.330632	0.972843	-89.6222	0.03627	3.627	0.0337236	3.37236
Telomere Length	Lung Small Cell Carcinoma	rs75683534	0.124856	0.128259	0.330324	0.973462	-89.6156	0.0349119	3.49119	0.0343821	3.43821
Telomere Length	Lung Small Cell Carcinoma	rs139795227	0.116467	0.128677	0.365407	0.90511	-90.3447	-0.0346223	3.46223	-0.0382477	3.82477
Telomere Length	Lung Small Cell Carcinoma	rs6669563	0.124798	0.128889	0.332917	0.968255	-89.6711	0.0344318	3.44318	0.0288486	2.88486
Telomere Length	Lung Small Cell Carcinoma	rs145114957	0.116497	0.128499	0.364616	0.906604	-90.3288	-0.0343689	3.43689	-0.03666	3.666
Telomere Length	Lung Small Cell Carcinoma	rs1985369	0.124682	0.128906	0.333427	0.967234	-89.682	0.0334725	3.34725	0.0277646	2.77646
Telomere Length	Lung Small Cell Carcinoma	rs12613375	0.116848	0.128667	0.363801	0.908145	-90.3123	-0.0314594	3.14594	-0.0350223	3.50223
Telomere Length	Lung Small Cell Carcinoma	rs932002	0.11694	0.129598	0.366881	0.902332	-90.3743	-0.0306979	3.06979	-0.0411995	4.11995
Telomere Length	Lung Small Cell Carcinoma	rs9878436	0.116979	0.128749	0.363573	0.908578	-90.3077	-0.0303799	3.03799	-0.0345629	3.45629
Telomere Length	Lung Small Cell Carcinoma	rs112394943	0.116998	0.128639	0.363083	0.909507	-90.2978	-0.0302183	3.02183	-0.0335756	3.35756
Telomere Length	Lung Small Cell Carcinoma	rs41269079	0.124115	0.12867	0.334744	0.964602	-89.7101	0.0287755	2.87755	0.0249672	2.49672
Telomere Length	Lung Small Cell Carcinoma	rs117469989	0.124021	0.128599	0.334845	0.9644	-89.7122	0.0279927	2.79927	0.0247532	2.47532
Telomere Length	Lung Small Cell Carcinoma	rs8105767	0.1239	0.129553	0.338889	0.956363	-89.798	0.026991	2.6991	0.0162131	1.62131
Telomere Length	Lung Small Cell Carcinoma	rs7209057	0.11751	0.128666	0.361086	0.913299	-90.2574	-0.0259759	2.59759	-0.0295466	2.95466
Telomere Length	Lung Small Cell Carcinoma	rs73581419	0.123767	0.128756	0.336427	0.961249	-89.7458	0.0258869	2.58869	0.0214042	2.14042
Telomere Length	Lung Small Cell Carcinoma	rs117962821	0.123662	0.128648	0.336429	0.961245	-89.7459	0.0250168	2.50168	0.0214002	2.14002
Telomere Length	Lung Small Cell Carcinoma	rs10808899	0.123649	0.129011	0.337845	0.958432	-89.7759	0.0249057	2.49057	0.0184109	1.84109
Telomere Length	Lung Small Cell Carcinoma	rs8088824	0.117646	0.129112	0.362194	0.911193	-90.2798	-0.0248473	2.48473	-0.0317842	3.17842
Telomere Length	Lung Small Cell Carcinoma	rs115451758	0.123499	0.128778	0.337557	0.959004	-89.7698	0.0236643	2.36643	0.0190195	1.90195
Telomere Length	Lung Small Cell Carcinoma	rs8051249	0.123486	0.128669	0.337197	0.959719	-89.7622	0.0235556	2.35556	0.0197788	1.97788
Telomere Length	Lung Small Cell Carcinoma	rs11769630	0.117841	0.12874	0.360012	0.915342	-90.2356	-0.0232337	2.32337	-0.0273753	2.73753
Telomere Length	Lung Small Cell Carcinoma	rs2977608	0.117851	0.128502	0.359086	0.917108	-90.2167	-0.0231531	2.31531	-0.0254992	2.54992
Telomere Length	Lung Small Cell Carcinoma	rs1980240	0.123429	0.12873	0.337651	0.958817	-89.7718	0.0230852	2.30852	0.0188204	1.88204
Telomere Length	Lung Small Cell Carcinoma	rs1003322	0.123386	0.128672	0.337598	0.958923	-89.7707	0.0227323	2.27323	0.0189327	1.89327
Telomere Length	Lung Small Cell Carcinoma	rs3768321	0.123364	0.128722	0.337874	0.958375	-89.7765	0.0225427	2.25427	0.018351	1.8351
Telomere Length	Lung Small Cell Carcinoma	rs2276182	0.123347	0.129189	0.33969	0.954777	-89.8149	0.0224042	2.24042	0.0145276	1.45276
Telomere Length	Lung Small Cell Carcinoma	rs17185038	0.118094	0.128647	0.358638	0.917964	-90.2076	-0.0211379	2.11379	-0.0245892	2.45892
Telomere Length	Lung Small Cell Carcinoma	rs2303262	0.118123	0.130217	0.364342	0.907122	-90.3232	-0.0208976	2.08976	-0.0361094	3.61094
Telomere Length	Lung Small Cell Carcinoma	rs13230646	0.118246	0.12884	0.358736	0.917776	-90.2096	-0.0198761	1.98761	-0.0247888	2.47888
Telomere Length	Lung Small Cell Carcinoma	rs2069536	0.123012	0.128764	0.339412	0.955329	-89.809	0.0196302	1.96302	0.0151137	1.51137
Telomere Length	Lung Small Cell Carcinoma	rs10845387	0.122974	0.128698	0.339313	0.955524	-89.8069	0.0193123	1.93123	0.0153209	1.53209
Telomere Length	Lung Small Cell Carcinoma	rs8102497	0.12292	0.128835	0.340038	0.95409	-89.8222	0.0188687	1.88687	0.0137971	1.37971
Telomere Length	Lung Small Cell Carcinoma	rs6007020	0.118381	0.128811	0.358079	0.919031	-90.1962	-0.0187576	1.87576	-0.0234555	2.34555
Telomere Length	Lung Small Cell Carcinoma	rs75544730	0.118405	0.128758	0.357787	0.91959	-90.1902	-0.0185578	1.85578	-0.022861	2.2861
Telomere Length	Lung Small Cell Carcinoma	rs13062095	0.118448	0.128769	0.357653	0.919846	-90.1875	-0.0182004	1.82004	-0.0225892	2.25892
Telomere Length	Lung Small Cell Carcinoma	rs10112752	0.118456	0.129503	0.360352	0.914695	-90.2425	-0.0181344	1.81344	-0.0280627	2.80627
Telomere Length	Lung Small Cell Carcinoma	rs17464525	0.118549	0.129346	0.359389	0.916529	-90.2229	-0.0173603	1.73603	-0.026114	2.6114
Telomere Length	Lung Small Cell Carcinoma	rs11746381	0.122725	0.128842	0.340831	0.952524	-89.8389	0.0172516	1.72516	0.0121336	1.21336
Telomere Length	Lung Small Cell Carcinoma	rs35671754	0.122651	0.128732	0.340711	0.952762	-89.8364	0.016637	1.6637	0.0123867	1.23867
Telomere Length	Lung Small Cell Carcinoma	rs9398196	0.122592	0.12884	0.341345	0.951511	-89.8497	0.0161514	1.61514	0.0110569	1.10569
Telomere Length	Lung Small Cell Carcinoma	rs6751209	0.122537	0.128736	0.341176	0.951845	-89.8462	0.0156931	1.56931	0.0114121	1.14121
Telomere Length	Lung Small Cell Carcinoma	rs13129697	0.122471	0.128868	0.341931	0.950358	-89.862	0.0151442	1.51442	0.00983161	0.983161
Telomere Length	Lung Small Cell Carcinoma	rs146546514	0.122369	0.129078	0.343119	0.94802	-89.887	0.0142962	1.42962	0.00734749	0.734749
Telomere Length	Lung Small Cell Carcinoma	rs869785	0.118932	0.128831	0.355923	0.923162	-90.1521	-0.0141877	1.41877	-0.0190658	1.90658
Telomere Length	Lung Small Cell Carcinoma	rs7101497	0.119059	0.128869	0.355552	0.923873	-90.1445	-0.0131386	1.31386	-0.0183101	1.83101
Telomere Length	Lung Small Cell Carcinoma	rs139122544	0.119154	0.128762	0.35477	0.925376	-90.1285	-0.0123527	1.23527	-0.0167129	1.67129
Telomere Length	Lung Small Cell Carcinoma	rs4498805	0.119164	0.128871	0.355134	0.924677	-90.136	-0.0122663	1.22663	-0.0174565	1.74565
Telomere Length	Lung Small Cell Carcinoma	rs62207005	0.119168	0.129048	0.355778	0.923439	-90.1492	-0.0122305	1.22305	-0.0187711	1.87711
Telomere Length	Lung Small Cell Carcinoma	rs117238689	0.122047	0.12895	0.343909	0.946469	-89.9035	0.0116304	1.16304	0.00569984	0.569984
Telomere Length	Lung Small Cell Carcinoma	rs3757387	0.119399	0.129071	0.354933	0.925064	-90.1318	-0.0103194	1.03194	-0.0170449	1.70449
Telomere Length	Lung Small Cell Carcinoma	rs28711261	0.119442	0.128759	0.353597	0.927636	-90.1044	-0.00996547	0.996547	-0.0143124	1.43124
Telomere Length	Lung Small Cell Carcinoma	rs10840270	0.119444	0.128837	0.353877	0.927095	-90.1102	-0.00994398	0.994398	-0.0148864	1.48864
Telomere Length	Lung Small Cell Carcinoma	rs6054257	0.121703	0.128758	0.344552	0.945209	-89.917	0.00878233	0.878233	0.00436066	0.436066
Telomere Length	Lung Small Cell Carcinoma	rs4530278	0.121671	0.128834	0.344966	0.944399	-89.9256	0.00851166	0.851166	0.00350061	0.350061
Telomere Length	Lung Small Cell Carcinoma	rs183553155	0.121652	0.128837	0.345052	0.94423	-89.9274	0.00835732	0.835732	0.00332085	0.332085
Telomere Length	Lung Small Cell Carcinoma	rs76883411	0.121469	0.128771	0.345529	0.943297	-89.9373	0.00683844	0.683844	0.00232916	0.232916
Telomere Length	Lung Small Cell Carcinoma	rs41304832	0.121463	0.128818	0.345732	0.9429	-89.9416	0.00678832	0.678832	0.00190677	0.190677
Telomere Length	Lung Small Cell Carcinoma	rs72801474	0.121442	0.128736	0.345508	0.943339	-89.9369	0.00661164	0.661164	0.0023736	0.237359
Telomere Length	Lung Small Cell Carcinoma	rs6584607	0.121368	0.128759	0.345884	0.942603	-89.9447	0.00600542	0.600542	0.00159159	0.159159
Telomere Length	Lung Small Cell Carcinoma	rs66731853	0.121087	0.128927	0.347634	0.939189	-89.9812	0.00366957	0.366957	-0.00203597	0.203597
Telomere Length	Lung Small Cell Carcinoma	rs111527438	0.120235	0.12878	0.350486	0.933648	-90.0403	-0.00338749	0.338749	-0.00792383	0.792383
Telomere Length	Lung Small Cell Carcinoma	rs6590343	0.120922	0.128798	0.347805	0.938855	-89.9847	0.00230713	0.230713	-0.00239134	0.239134
Telomere Length	Lung Small Cell Carcinoma	rs1907702	0.120376	0.128803	0.350009	0.934573	-90.0304	-0.0022215	0.22215	-0.00694109	0.694109
Telomere Length	Lung Small Cell Carcinoma	rs8053839	0.120816	0.128828	0.348343	0.937809	-89.9959	0.00142851	0.142851	-0.00350233	0.350233
Telomere Length	Lung Small Cell Carcinoma	rs76219171	0.120509	0.128918	0.349905	0.934774	-90.0283	-0.00111921	0.111921	-0.00672758	0.672758
Telomere Length	Lung Small Cell Carcinoma	rs7790856	0.12077	0.130359	0.354216	0.926443	-90.1171	0.0010444	0.10444	-0.0155801	1.55801
Telomere Length	Lung Small Cell Carcinoma	All	0.120644	0.128194	0.346651	0.941105	NA	0	0	2.36e-16	2.36e-14
Telomere Length	Lung Squamous Cell Carcinoma	rs611646	-0.0366117	0.0882412	0.678211	-0.414905	-93.2397	-24.6385	2463.85	-25.0204	2502.04
Telomere Length	Lung Squamous Cell Carcinoma	rs12638862	0.0366766	0.0938748	0.696022	0.390697	-93.6342	22.6803	2268.03	21.6189	2161.89
Telomere Length	Lung Squamous Cell Carcinoma	rs2303262	-0.0199184	0.0903682	0.825548	-0.220414	-96.4087	-13.8604	1386.04	-13.7606	1376.06
Telomere Length	Lung Squamous Cell Carcinoma	rs8088824	0.0216367	0.0882452	0.80631	0.245189	-96.005	12.9698	1296.98	13.1949	1319.49
Telomere Length	Lung Squamous Cell Carcinoma	rs10024820	0.0175451	0.086905	0.840004	0.201888	-96.7105	10.328	1032.8	10.6881	1068.81
Telomere Length	Lung Squamous Cell Carcinoma	rs4724	0.0174773	0.0903704	0.846649	0.193396	-96.8489	10.2843	1028.43	10.1965	1019.65
Telomere Length	Lung Squamous Cell Carcinoma	rs1291143	-0.0131441	0.090492	0.884512	-0.145251	-97.6333	-9.48652	948.652	-9.40916	940.916
Telomere Length	Lung Squamous Cell Carcinoma	rs3757387	0.0159115	0.0890448	0.858181	0.178691	-97.0885	9.27329	927.329	9.34509	934.509
Telomere Length	Lung Squamous Cell Carcinoma	rs12941945	-0.0112339	0.0891106	0.899679	-0.126067	-97.9459	-8.25322	825.322	-8.29851	829.851
Telomere Length	Lung Squamous Cell Carcinoma	rs9419958	0.0143106	0.0923179	0.87681	0.155015	-97.4743	8.2397	823.97	7.97439	797.439
Telomere Length	Lung Squamous Cell Carcinoma	rs10112752	0.0140732	0.0901067	0.875888	0.156184	-97.4552	8.0864	808.64	8.04207	804.207
Telomere Length	Lung Squamous Cell Carcinoma	rs35640778	-0.010796	0.0917462	0.906327	-0.117672	-98.0827	-7.97047	797.047	-7.81251	781.251
Telomere Length	Lung Squamous Cell Carcinoma	rs6751209	-0.0107695	0.0869698	0.90145	-0.12383	-97.9824	-7.95334	795.334	-8.169	816.9
Telomere Length	Lung Squamous Cell Carcinoma	rs1609812	0.0117357	0.0905795	0.896912	0.129563	-97.889	6.57721	657.721	6.50089	650.089
Telomere Length	Lung Squamous Cell Carcinoma	rs965109	-0.00798721	0.0905985	0.929749	-0.0881605	-98.5635	-6.15697	615.697	-6.10395	610.395
Telomere Length	Lung Squamous Cell Carcinoma	rs2282764	0.011054	0.0893279	0.901517	0.123746	-97.9837	6.13702	613.702	6.16412	616.412
Telomere Length	Lung Squamous Cell Carcinoma	rs76666449	0.0109557	0.0896076	0.90269	0.122263	-98.0079	6.0736	607.36	6.0783	607.83
Telomere Length	Lung Squamous Cell Carcinoma	rs429358	0.0106447	0.0885227	0.904287	0.120248	-98.0407	5.87275	587.275	5.96161	596.161
Telomere Length	Lung Squamous Cell Carcinoma	rs1727302	-0.00740825	0.0895527	0.93407	-0.082725	-98.6521	-5.78316	578.316	-5.78927	578.927
Telomere Length	Lung Squamous Cell Carcinoma	rs28502153	0.0104657	0.0898693	0.907292	0.116455	-98.1025	5.75723	575.723	5.74202	574.202
Telomere Length	Lung Squamous Cell Carcinoma	rs115610405	-0.00699235	0.0902983	0.938277	-0.0774361	-98.7383	-5.51463	551.463	-5.48307	548.307
Telomere Length	Lung Squamous Cell Carcinoma	rs1023767	-0.00679246	0.0895371	0.939529	-0.0758619	-98.7639	-5.38557	538.557	-5.39194	539.194
Telomere Length	Lung Squamous Cell Carcinoma	rs4498805	-0.00678037	0.0893995	0.939544	-0.0758435	-98.7642	-5.37776	537.776	-5.39087	539.087
Telomere Length	Lung Squamous Cell Carcinoma	rs8053839	-0.0065606	0.0891885	0.941361	-0.0735588	-98.8015	-5.23587	523.587	-5.2586	525.86
Telomere Length	Lung Squamous Cell Carcinoma	rs2056726	0.00965176	0.0898203	0.914427	0.107456	-98.2492	5.23169	523.169	5.22106	522.106
Telomere Length	Lung Squamous Cell Carcinoma	rs183553155	-0.00647402	0.0892796	0.942193	-0.072514	-98.8185	-5.17997	517.997	-5.19811	519.811
Telomere Length	Lung Squamous Cell Carcinoma	rs114719295	0.00952348	0.0891092	0.914889	0.106874	-98.2586	5.14886	514.886	5.18736	518.736
Telomere Length	Lung Squamous Cell Carcinoma	rs8105767	0.00951593	0.0904522	0.916214	0.105204	-98.2858	5.14399	514.399	5.09066	509.066
Telomere Length	Lung Squamous Cell Carcinoma	rs11866592	0.00924778	0.0901416	0.918287	0.102592	-98.3284	4.97086	497.086	4.93942	493.942
Telomere Length	Lung Squamous Cell Carcinoma	rs34003787	-0.00573902	0.0892595	0.948735	-0.0642959	-98.9524	-4.70541	470.541	-4.72234	472.234
Telomere Length	Lung Squamous Cell Carcinoma	rs17677991	-0.00561764	0.0900526	0.950259	-0.0623818	-98.9836	-4.62704	462.704	-4.61152	461.152
Telomere Length	Lung Squamous Cell Carcinoma	rs79127610	0.0087128	0.0894643	0.922418	0.0973886	-98.4132	4.62544	462.544	4.6382	463.82
Telomere Length	Lung Squamous Cell Carcinoma	rs3093888	0.00864364	0.0894701	0.923037	0.0966092	-98.4259	4.58079	458.079	4.59308	459.308
Telomere Length	Lung Squamous Cell Carcinoma	rs139897613	-0.00546432	0.0894356	0.951281	-0.0610978	-99.0045	-4.52805	452.805	-4.53719	453.719
Telomere Length	Lung Squamous Cell Carcinoma	rs145114957	-0.00542104	0.0889549	0.951406	-0.0609415	-99.007	-4.50011	450.011	-4.52813	452.813
Telomere Length	Lung Squamous Cell Carcinoma	rs2230590	0.00847078	0.0897082	0.924771	0.0944259	-98.4615	4.46918	446.918	4.46668	446.668
Telomere Length	Lung Squamous Cell Carcinoma	rs7705526	-0.00516365	0.0935464	0.95598	-0.0551988	-99.1006	-4.33392	433.392	-4.19567	419.567
Telomere Length	Lung Squamous Cell Carcinoma	rs117469989	-0.00507802	0.0890335	0.954517	-0.057035	-99.0707	-4.27864	427.864	-4.30197	430.197
Telomere Length	Lung Squamous Cell Carcinoma	rs139795227	-0.00454747	0.0895247	0.959488	-0.0507957	-99.1724	-3.93608	393.608	-3.94076	394.076
Telomere Length	Lung Squamous Cell Carcinoma	rs13062095	-0.00451018	0.089562	0.959837	-0.0503582	-99.1795	-3.91201	391.201	-3.91543	391.543
Telomere Length	Lung Squamous Cell Carcinoma	rs6590343	0.00758317	0.0894728	0.932457	0.0847539	-98.6191	3.89609	389.609	3.90673	390.673
Telomere Length	Lung Squamous Cell Carcinoma	rs762679	-0.00431696	0.090177	0.961818	-0.0478721	-99.22	-3.78726	378.726	-3.7715	377.15
Telomere Length	Lung Squamous Cell Carcinoma	rs13230646	0.00731785	0.0897817	0.935039	0.0815071	-98.672	3.72479	372.479	3.71876	371.876
Telomere Length	Lung Squamous Cell Carcinoma	rs10851590	0.00721481	0.0894508	0.935715	0.0806567	-98.6858	3.65826	365.826	3.66953	366.953
Telomere Length	Lung Squamous Cell Carcinoma	rs41304832	-0.0040959	0.0896832	0.963573	-0.0456708	-99.2559	-3.64453	364.453	-3.64406	364.406
Telomere Length	Lung Squamous Cell Carcinoma	rs6776756	0.00706432	0.0899397	0.937394	0.0785451	-98.7202	3.5611	356.11	3.54728	354.728
Telomere Length	Lung Squamous Cell Carcinoma	rs4695407	-0.0038845	0.0897662	0.965484	-0.0432735	-99.2949	-3.50804	350.804	-3.50527	350.527
Telomere Length	Lung Squamous Cell Carcinoma	rs6669563	0.00688534	0.0899996	0.939018	0.0765041	-98.7535	3.44554	344.554	3.42912	342.912
Telomere Length	Lung Squamous Cell Carcinoma	rs6007020	0.0066799	0.0897934	0.940699	0.0743918	-98.7879	3.31289	331.289	3.30683	330.683
Telomere Length	Lung Squamous Cell Carcinoma	rs1881985	0.00665384	0.0898418	0.940961	0.0740617	-98.7933	3.29607	329.607	3.28772	328.772
Telomere Length	Lung Squamous Cell Carcinoma	rs80324517	-0.00335099	0.0899939	0.970297	-0.0372358	-99.3933	-3.16358	316.358	-3.15572	315.572
Telomere Length	Lung Squamous Cell Carcinoma	rs115451758	-0.00332223	0.0898046	0.97049	-0.036994	-99.3972	-3.14501	314.501	-3.14172	314.172
Telomere Length	Lung Squamous Cell Carcinoma	rs1980240	-0.00326771	0.0897416	0.970954	-0.0364124	-99.4067	-3.1098	310.98	-3.10805	310.805
Telomere Length	Lung Squamous Cell Carcinoma	rs7218033	-0.00321355	0.0901151	0.971553	-0.0356606	-99.419	-3.07484	307.484	-3.06453	306.453
Telomere Length	Lung Squamous Cell Carcinoma	rs4919611	0.00608824	0.0900145	0.946075	0.0676362	-98.898	2.93089	293.089	2.91572	291.572
Telomere Length	Lung Squamous Cell Carcinoma	rs2081601	-0.00297484	0.0897132	0.973547	-0.0331595	-99.4597	-2.92071	292.071	-2.91973	291.973
Telomere Length	Lung Squamous Cell Carcinoma	rs75664430	-0.00288849	0.0901653	0.974444	-0.0320354	-99.478	-2.86496	286.496	-2.85465	285.465
Telomere Length	Lung Squamous Cell Carcinoma	rs117630647	0.00596266	0.0899587	0.947153	0.0662822	-98.92	2.84981	284.981	2.83733	283.733
Telomere Length	Lung Squamous Cell Carcinoma	rs2977608	-0.00279237	0.0893224	0.975061	-0.0312617	-99.4906	-2.8029	280.29	-2.80986	280.986
Telomere Length	Lung Squamous Cell Carcinoma	rs5742915	0.00584234	0.0901292	0.948316	0.0648218	-98.9438	2.77212	277.212	2.75278	275.278
Telomere Length	Lung Squamous Cell Carcinoma	rs111527438	-0.00272229	0.0897305	0.975797	-0.0303385	-99.5057	-2.75765	275.765	-2.75641	275.641
Telomere Length	Lung Squamous Cell Carcinoma	rs62207005	0.0057539	0.0901411	0.949104	0.0638321	-98.9599	2.71502	271.502	2.69548	269.548
Telomere Length	Lung Squamous Cell Carcinoma	rs28711261	0.00572952	0.0897161	0.94908	0.0638627	-98.9594	2.69928	269.928	2.69726	269.726
Telomere Length	Lung Squamous Cell Carcinoma	rs8102497	-0.00262662	0.0899417	0.976702	-0.0292036	-99.5242	-2.69588	269.588	-2.69071	269.071
Telomere Length	Lung Squamous Cell Carcinoma	rs145170152	-0.00259049	0.0896867	0.976957	-0.0288838	-99.5294	-2.67256	267.256	-2.67219	267.219
Telomere Length	Lung Squamous Cell Carcinoma	rs2738775	0.00563029	0.0898714	0.950047	0.0626483	-98.9792	2.63521	263.521	2.62695	262.695
Telomere Length	Lung Squamous Cell Carcinoma	rs113800756	-0.00248418	0.0897626	0.977921	-0.027675	-99.5491	-2.60392	260.392	-2.60221	260.221
Telomere Length	Lung Squamous Cell Carcinoma	rs6584607	-0.0024313	0.0897232	0.978382	-0.0270978	-99.5585	-2.56978	256.978	-2.56879	256.879
Telomere Length	Lung Squamous Cell Carcinoma	rs10840270	0.00544108	0.0899284	0.951754	0.0605046	-99.0142	2.51305	251.305	2.50284	250.284
Telomere Length	Lung Squamous Cell Carcinoma	rs10905255	0.00533789	0.090097	0.952756	0.059246	-99.0347	2.44642	244.642	2.42998	242.998
Telomere Length	Lung Squamous Cell Carcinoma	rs6659669	0.00524874	0.0898335	0.953408	0.0584274	-99.048	2.38886	238.886	2.38259	238.259
Telomere Length	Lung Squamous Cell Carcinoma	rs17185038	-0.00207886	0.0897303	0.981516	-0.0231678	-99.6225	-2.34222	234.222	-2.34127	234.127
Telomere Length	Lung Squamous Cell Carcinoma	rs61818036	-0.00196859	0.0899769	0.982545	-0.0218788	-99.6435	-2.27103	227.103	-2.26665	226.665
Telomere Length	Lung Squamous Cell Carcinoma	rs9878436	-0.00193627	0.0899863	0.982833	-0.0215174	-99.6494	-2.25016	225.016	-2.24573	224.573
Telomere Length	Lung Squamous Cell Carcinoma	rs4530278	-0.00188336	0.0899639	0.983298	-0.0209347	-99.6589	-2.216	221.6	-2.21199	221.199
Telomere Length	Lung Squamous Cell Carcinoma	rs939916	0.0047333	0.0902995	0.958196	0.0524178	-99.1459	2.05607	205.607	2.03467	203.467
Telomere Length	Lung Squamous Cell Carcinoma	rs7101497	-0.00156435	0.0900464	0.986139	-0.0173728	-99.7169	-2.01003	201.003	-2.00578	200.578
Telomere Length	Lung Squamous Cell Carcinoma	rs7209057	-0.00150221	0.0899101	0.98667	-0.0167079	-99.7278	-1.96991	196.991	-1.96728	196.728
Telomere Length	Lung Squamous Cell Carcinoma	rs4743037	0.0045199	0.0899514	0.959925	0.0502483	-99.1813	1.91829	191.829	1.90906	190.906
Telomere Length	Lung Squamous Cell Carcinoma	rs71593392	0.00443485	0.0898666	0.960641	0.0493493	-99.1959	1.86337	186.337	1.85702	185.702
Telomere Length	Lung Squamous Cell Carcinoma	rs76374777	-0.00120143	0.0899127	0.989339	-0.0133621	-99.7823	-1.7757	177.57	-1.77359	177.359
Telomere Length	Lung Squamous Cell Carcinoma	rs138420497	-0.0011693	0.0900228	0.989637	-0.0129889	-99.7884	-1.75496	175.496	-1.75198	175.198
Telomere Length	Lung Squamous Cell Carcinoma	rs869785	0.0042353	0.0900363	0.962481	0.0470399	-99.2336	1.73453	173.453	1.72332	172.332
Telomere Length	Lung Squamous Cell Carcinoma	rs76219171	0.00418835	0.0901058	0.962926	0.0464826	-99.2426	1.70422	170.422	1.69105	169.105
Telomere Length	Lung Squamous Cell Carcinoma	rs1332941	-0.00101198	0.0901887	0.991047	-0.0112207	-99.8172	-1.65339	165.339	-1.64961	164.961
Telomere Length	Lung Squamous Cell Carcinoma	rs7790856	-0.00101083	0.0911478	0.991152	-0.01109	-99.8193	-1.65264	165.264	-1.64204	164.204
Telomere Length	Lung Squamous Cell Carcinoma	rs7012816	0.00409937	0.0899898	0.963666	0.0455537	-99.2578	1.64677	164.677	1.63728	163.728
Telomere Length	Lung Squamous Cell Carcinoma	rs6054257	-0.000909542	0.0899472	0.991932	-0.0101119	-99.8352	-1.58725	158.725	-1.58542	158.542
Telomere Length	Lung Squamous Cell Carcinoma	rs10808899	0.00393719	0.0902227	0.965193	0.0436386	-99.289	1.54206	154.206	1.5264	152.64
Telomere Length	Lung Squamous Cell Carcinoma	rs11190184	0.00382143	0.0900995	0.966169	0.0424134	-99.3089	1.46731	146.731	1.45547	145.547
Telomere Length	Lung Squamous Cell Carcinoma	rs144204502	0.00379424	0.0903883	0.966517	0.0419771	-99.316	1.44976	144.976	1.43022	143.022
Telomere Length	Lung Squamous Cell Carcinoma	rs112394943	0.00379221	0.0899953	0.966389	0.0421379	-99.3134	1.44845	144.845	1.43952	143.952
Telomere Length	Lung Squamous Cell Carcinoma	rs2293579	0.00376112	0.0900238	0.966675	0.0417792	-99.3193	1.42838	142.838	1.41876	141.876
Telomere Length	Lung Squamous Cell Carcinoma	rs146546514	-0.000643587	0.0902297	0.994309	-0.00713276	-99.8838	-1.41553	141.553	-1.41294	141.294
Telomere Length	Lung Squamous Cell Carcinoma	rs11085072	0.00374063	0.0899747	0.966838	0.0415743	-99.3226	1.41515	141.515	1.40689	140.689
Telomere Length	Lung Squamous Cell Carcinoma	rs13129697	-0.000633497	0.0901062	0.99439	-0.00703056	-99.8854	-1.40902	140.902	-1.40703	140.703
Telomere Length	Lung Squamous Cell Carcinoma	rs10845387	-0.000516791	0.0899868	0.995418	-0.00574297	-99.9064	-1.33367	133.367	-1.33248	133.248
Telomere Length	Lung Squamous Cell Carcinoma	rs9398196	0.00360944	0.0900869	0.96804	0.0400662	-99.3472	1.33045	133.045	1.31959	131.959
Telomere Length	Lung Squamous Cell Carcinoma	rs1907702	0.0036047	0.0900228	0.96806	0.0400421	-99.3476	1.32739	132.739	1.31819	131.819
Telomere Length	Lung Squamous Cell Carcinoma	rs2276182	-0.000486537	0.090357	0.995704	-0.00538461	-99.9123	-1.31413	131.413	-1.31174	131.174
Telomere Length	Lung Squamous Cell Carcinoma	rs932002	-0.000460483	0.0906404	0.995947	-0.00508033	-99.9172	-1.29731	129.731	-1.29412	129.412
Telomere Length	Lung Squamous Cell Carcinoma	rs17464525	-0.000319117	0.0904518	0.997185	-0.00352803	-99.9425	-1.20604	120.604	-1.20425	120.425
Telomere Length	Lung Squamous Cell Carcinoma	rs871134	-0.000310937	0.0901937	0.997249	-0.00344744	-99.9438	-1.20076	120.076	-1.19959	119.959
Telomere Length	Lung Squamous Cell Carcinoma	rs12412214	-0.000283694	0.0903372	0.997494	-0.00314039	-99.9488	-1.18317	118.317	-1.18181	118.181
Telomere Length	Lung Squamous Cell Carcinoma	rs35902944	0.00336603	0.0916316	0.970697	0.0367344	-99.4015	1.17329	117.329	1.12669	112.669
Telomere Length	Lung Squamous Cell Carcinoma	rs112625468	0.00334902	0.0901119	0.970353	0.0371651	-99.3944	1.1623	116.23	1.15163	115.163
Telomere Length	Lung Squamous Cell Carcinoma	rs11746381	0.00334208	0.0900946	0.970409	0.0370953	-99.3956	1.15782	115.782	1.14759	114.759
Telomere Length	Lung Squamous Cell Carcinoma	rs1985369	-0.000130242	0.0902181	0.998848	-0.00144363	-99.9765	-1.08409	108.409	-1.08358	108.358
Telomere Length	Lung Squamous Cell Carcinoma	rs11769630	-8.73e-05	0.0900623	0.999227	-0.000969329	-99.9842	-1.05637	105.637	-1.05612	105.612
Telomere Length	Lung Squamous Cell Carcinoma	rs73581419	0.00311471	0.0900934	0.972421	0.034572	-99.4367	1.01102	101.102	1.00151	100.151
Telomere Length	Lung Squamous Cell Carcinoma	rs139122544	0.00307548	0.0900412	0.972752	0.0341564	-99.4435	0.985694	98.5694	0.977445	97.7445
Telomere Length	Lung Squamous Cell Carcinoma	rs6873104	0.0030662	0.0901094	0.972855	0.0340275	-99.4456	0.979699	97.9699	0.969982	96.9982
Telomere Length	Lung Squamous Cell Carcinoma	rs17445108	0.00304124	0.0899861	0.973039	0.0337968	-99.4493	0.963586	96.3586	0.956626	95.6626
Telomere Length	Lung Squamous Cell Carcinoma	rs76883411	0.00302948	0.0900384	0.973159	0.0336466	-99.4518	0.955994	95.5994	0.947929	94.7929
Telomere Length	Lung Squamous Cell Carcinoma	rs1003322	0.00301448	0.0900286	0.973289	0.0334836	-99.4544	0.946308	94.6308	0.938494	93.8494
Telomere Length	Lung Squamous Cell Carcinoma	rs9600019	0.000137535	0.090054	0.998781	0.00152725	-99.9751	-0.9112	91.12	-0.911582	91.1582
Telomere Length	Lung Squamous Cell Carcinoma	rs12369950	0.000167169	0.0900591	0.998519	0.00185622	-99.9698	-0.892067	89.2067	-0.892537	89.2537
Telomere Length	Lung Squamous Cell Carcinoma	rs35671754	0.00285157	0.0900475	0.974737	0.0316673	-99.484	0.841122	84.1122	0.833344	83.3344
Telomere Length	Lung Squamous Cell Carcinoma	rs6565924	0.00268722	0.0900789	0.976201	0.0298319	-99.5139	0.735012	73.5012	0.727082	72.7082
Telomere Length	Lung Squamous Cell Carcinoma	rs66731853	0.00263251	0.0901704	0.976709	0.0291949	-99.5243	0.699689	69.9689	0.690202	69.0202
Telomere Length	Lung Squamous Cell Carcinoma	rs8051249	0.00250212	0.0900569	0.977835	0.0277837	-99.5473	0.615499	61.5499	0.608506	60.8506
Telomere Length	Lung Squamous Cell Carcinoma	rs117238689	0.000622326	0.0901925	0.994495	0.00689998	-99.8876	-0.598193	59.8193	-0.600534	60.0534
Telomere Length	Lung Squamous Cell Carcinoma	rs12615793	0.000647047	0.0906992	0.994308	0.00713399	-99.8838	-0.582232	58.2232	-0.586986	58.6986
Telomere Length	Lung Squamous Cell Carcinoma	rs4362428	0.00231776	0.0900692	0.97947	0.0257331	-99.5807	0.49647	49.647	0.489789	48.9789
Telomere Length	Lung Squamous Cell Carcinoma	rs72801474	0.00231464	0.0900439	0.979492	0.0257057	-99.5812	0.494452	49.4452	0.488199	48.8199
Telomere Length	Lung Squamous Cell Carcinoma	rs10150625	0.000909673	0.0900605	0.991941	0.0101007	-99.8354	-0.412667	41.2667	-0.415233	41.5233
Telomere Length	Lung Squamous Cell Carcinoma	rs11557154	0.000947989	0.0903804	0.991631	0.0104889	-99.8291	-0.387928	38.7928	-0.392759	39.2759
Telomere Length	Lung Squamous Cell Carcinoma	rs11579626	0.00214651	0.0901497	0.981004	0.0238106	-99.612	0.385903	38.5903	0.378485	37.8485
Telomere Length	Lung Squamous Cell Carcinoma	rs75544730	0.00104662	0.0900884	0.990731	0.0116177	-99.8107	-0.324246	32.4246	-0.327406	32.7406
Telomere Length	Lung Squamous Cell Carcinoma	rs2069536	0.00109238	0.0900991	0.990327	0.0121242	-99.8025	-0.294704	29.4704	-0.298086	29.8086
Telomere Length	Lung Squamous Cell Carcinoma	rs61748181	0.00200497	0.0902294	0.982272	0.0222208	-99.6379	0.294513	29.4513	0.286447	28.6447
Telomere Length	Lung Squamous Cell Carcinoma	rs17803849	0.00111298	0.090518	0.99019	0.0122957	-99.7997	-0.281399	28.1399	-0.288153	28.8153
Telomere Length	Lung Squamous Cell Carcinoma	rs117962821	0.00114814	0.0900742	0.98983	0.0127466	-99.7923	-0.258698	25.8698	-0.262049	26.2049
Telomere Length	Lung Squamous Cell Carcinoma	rs12613375	0.00116126	0.0901	0.989717	0.0128886	-99.79	-0.250227	25.0227	-0.253829	25.3829
Telomere Length	Lung Squamous Cell Carcinoma	rs80150989	0.00120435	0.0900721	0.989332	0.0133709	-99.7821	-0.222409	22.2409	-0.225905	22.5905
Telomere Length	Lung Squamous Cell Carcinoma	rs41269079	0.0018833	0.0900912	0.983322	0.0209044	-99.6594	0.215961	21.5961	0.210236	21.0236
Telomere Length	Lung Squamous Cell Carcinoma	rs3768321	0.00124395	0.0900908	0.988983	0.0138077	-99.775	-0.196841	19.6841	-0.200618	20.0618
Telomere Length	Lung Squamous Cell Carcinoma	rs182059586	0.00174552	0.0900579	0.984536	0.0193822	-99.6842	0.127001	12.7001	0.122111	12.2111
Telomere Length	Lung Squamous Cell Carcinoma	rs12572897	0.00174549	0.0903054	0.984579	0.0193287	-99.6851	0.12698	12.698	0.119015	11.9015
Telomere Length	Lung Squamous Cell Carcinoma	rs3891167	0.00136775	0.0907946	0.987981	0.0150642	-99.7546	-0.116911	11.6911	-0.127876	12.7876
Telomere Length	Lung Squamous Cell Carcinoma	rs11646283	0.00141273	0.0901496	0.987497	0.0156709	-99.7447	-0.0878675	8.78675	-0.092749	9.2749
Telomere Length	Lung Squamous Cell Carcinoma	rs4660456	0.00160044	0.090086	0.985826	0.0177657	-99.7105	0.033326	3.3326	0.0285218	2.85218
Telomere Length	Lung Squamous Cell Carcinoma	rs10773176	0.00151238	0.0901499	0.986615	0.0167763	-99.7267	-0.0235289	2.35289	-0.0287585	2.87585
Telomere Length	Lung Squamous Cell Carcinoma	All	0.00154882	0.0896671	0.986219	0.017273	NA	0	0	-1.21e-15	1.21e-13

## Sheet: supplementary file 1f
supplementary file 1f. Multivariable Mendelian randomization analyses.
Lung Adenocarcinoma ~ Leukocyte Telomere Length +Cigarettes per day
Exposure	Outcome	Method	NSNPs	P	OR	LCI	UCI
Leukocyte Telomere Length	Lung Adenocarcinoma	IVW	143	2.98198e-20	2.52201	2.28124	2.78819
Cigarettes per day		IVW	21	2.39083e-23	6.31618	5.24868	7.60081
Leukocyte Telomere Length		LASSO	143	1.63e-21	2.07508	1.9213	2.24117
Cigarettes per day		LASSO	21	3.51e-15	4.22915	3.5219	5.07842
Leukocyte Telomere Length		Median	143	2.84559e-08	1.92514	1.71087	2.16626
Cigarettes per day		Median	21	2.82336e-10	5.43033	4.1537	7.09933
Leukocyte Telomere Length		MR Egger	143	7.10721e-18	3.81523	3.26742	4.45488
Cigarettes per day		MR Egger	21	5.68315e-22	5.74885	4.79704	6.88951
		MR Egger (Intercept)		0.001	0.986098	0.982161	0.99005
Lung Adenocarcinoma ~ Leukocyte Telomere Length + Smoking Initation (Ever vs. Never)
Exposure	Outcome	Method	NSNPs	P	OR	LCI	UCI
Leukocyte Telomere Length	Lung Adenocarcinoma	IVW	143	2.34279e-25	2.35927	2.18348	2.54922
Smoking Initiation		IVW	21	1.04403e-10	1.48025	1.3951	1.57059
Leukocyte Telomere Length		LASSO	143	2.7484e-19	1.8908	1.76121	2.02993
Smoking Initiation		LASSO	21	1.93704e-11	1.39654	1.32843	1.46815
Leukocyte Telomere Length		Median	143	1.25856e-11	2.12974	1.90408	2.38214
Smoking Initiation		Median	21	2.6694e-07	1.44051	1.34178	1.54651
Leukocyte Telomere Length		Egger	143	4.18534e-28	2.34902	2.17276	2.53958
Smoking Initiation		Egger	21	0.00016674	1.60962	1.41907	1.82577
		Egger (Intercept)		0.452	0.998002	0.996008	1

## Sheet: supplementary file 1g
supplementary file 1g. Multivariable MR analyses for LTL and lung cancer adjusting for obesity-related and alcohol-related traits
Fully Adjusted Model: Outcome ~ Leukocyte Telomere Length + BMI+Cigarettes per day+Alcohol Drinks per week
Exposure	Outcome	P	OR	LCI	UCI
Leukocyte Telomere Length	Lung Adenocarcinoma	5.12534e-19	2.54285	2.28996	2.82367
Body mass index (BMI)	Lung Adenocarcinoma	5.58356e-05	0.833132	0.79623	0.871744
Cigarettes per day	Lung Adenocarcinoma	0.723064	0.777551	0.382273	1.58156
Alcohol Drinks per Week	Lung Adenocarcinoma	0.000178446	0.289647	0.208104	0.403142
Leukocyte Telomere Length	Lung Cancer	7.82661e-13	1.63867	1.52951	1.75562
Body mass index (BMI)	Lung Cancer	6.80975e-06	0.85141	0.82151	0.882399
Cigarettes per day	Lung Cancer	0.880347	1.14822	0.458411	2.87606
Alcohol Drinks per Week	Lung Cancer	0.00175079	0.497739	0.398275	0.622043
Leukocyte Telomere Length	Lung Small Cell Carcinoma	0.712294	1.05434	0.91341	1.21701
Body mass index (BMI)	Lung Small Cell Carcinoma	0.601916	0.959857	0.887354	1.03828
Cigarettes per day	Lung Small Cell Carcinoma	0.692045	2.09593	0.323585	13.5758
Alcohol Drinks per Week	Lung Small Cell Carcinoma	0.275104	0.509365	0.274529	0.94508
Leukocyte Telomere Length	Lung Squamous Cell Carcinoma	0.972614	1.00347	0.907146	1.11002
Body mass index (BMI)	Lung Squamous Cell Carcinoma	0.000867945	0.840532	0.797809	0.885543
Cigarettes per day	Lung Squamous Cell Carcinoma	0.831021	1.37352	0.310391	6.07803
Alcohol Drinks per Week	Lung Squamous Cell Carcinoma	0.680243	0.851606	0.576726	1.2575
Leukocyte Telomere Length	Lung Ever Smoker	1.63066e-08	1.55732	1.43983	1.68439
Body mass index (BMI)	Lung Ever Smoker	5.86204e-05	0.845539	0.810961	0.881591
Cigarettes per day	Lung Ever Smoker	0.525668	0.565813	0.230652	1.388
Alcohol Drinks per Week	Lung Ever Smoker	0.0257631	0.393802	0.25928	0.598118
Leukocyte Telomere Length	Lung Never Smoker	0.000296265	1.9116	1.5982	2.28645
Body mass index (BMI)	Lung Never Smoker	5.86204e-05	0.845539	0.810961	0.881591
Cigarettes per day	Lung Never Smoker	0.886449	0.856965	0.290746	2.52588
Alcohol Drinks per Week	Lung Never Smoker	0.0225877	0.212942	0.108064	0.419604
Outcome ~ Leukocyte Telomere Length + BMI
Exposure	Outcome	P	OR	LCI	UCI
Leukocyte Telomere Length	Lung Adenocarcinoma	3.72586e-18	2.48225	2.23559	2.75612
Body mass index (BMI)	Lung Adenocarcinoma	0.337236	1.04958	0.997967	1.10386
Leukocyte Telomere Length	Lung Cancer	4.85457e-12	1.61189	1.50428	1.7272
Body mass index (BMI)	Lung Cancer	9.04435e-09	1.25558	1.20684	1.3063
Leukocyte Telomere Length	Lung Small Cell Carcinoma	0.653333	1.06459	0.926108	1.22378
Body mass index (BMI)	Lung Small Cell Carcinoma	8.12791e-13	1.91519	1.74901	2.09717
Leukocyte Telomere Length	Lung Squamous Cell Carcinoma	0.843525	0.980481	0.887294	1.08345
Body mass index (BMI)	Lung Squamous Cell Carcinoma	1.2342e-11	1.50205	1.41452	1.59499
Leukocyte Telomere Length	Lung Ever Smoker	1.79387e-08	1.5451	1.43021	1.66922
Body mass index (BMI)	Lung Ever Smoker	8.6778e-06	1.22347	1.16923	1.28022
Leukocyte Telomere Length	Lung Never Smoker	0.000939238	1.81913	1.51814	2.1798
Body mass index (BMI)	Lung Never Smoker	0.402654	0.917309	0.82742	1.01696
Outcome ~ Leukocyte Telomere Length + WHR
Exposure	Outcome	P	OR	LCI	UCI
Leukocyte Telomere Length	Lung Adenocarcinoma	3.24317e-18	2.48974	2.24198	2.76487
Waist–hip ratio (WHR)	Lung Adenocarcinoma	0.262552	1.07672	1.00797	1.15015
Leukocyte Telomere Length	Lung Cancer	2.55897e-11	1.58419	1.4786	1.69732
Waist–hip ratio (WHR)	Lung Cancer	0.0130438	1.12554	1.07318	1.18046
Leukocyte Telomere Length	Lung Small Cell Carcinoma	0.931127	1.01236	0.878193	1.16703
Waist–hip ratio (WHR)	Lung Small Cell Carcinoma	0.00649329	1.35296	1.21074	1.51189
Leukocyte Telomere Length	Lung Squamous Cell Carcinoma	0.484537	0.933644	0.846299	1.03
Waist–hip ratio (WHR)	Lung Squamous Cell Carcinoma	0.0265985	1.17938	1.09481	1.27049
Leukocyte Telomere Length	Lung Ever Smoker	1.55378e-07	1.49261	1.3829	1.61104
Waist–hip ratio (WHR)	Lung Ever Smoker	0.0718763	1.1126	1.04856	1.18055
Leukocyte Telomere Length	Lung Never Smoker	0.000239065	1.94083	1.6203	2.32476
Waist–hip ratio (WHR)	Lung Never Smoker	0.829156	0.973574	0.859938	1.10223
Outcome ~ Leukocyte Telomere Length + HDL
Exposure	Outcome	P	OR	LCI	UCI
Leukocyte Telomere Length	Lung Adenocarcinoma	1.37928e-16	2.39826	2.15745	2.66595
HDL	Lung Adenocarcinoma	0.785691	0.988103	0.945552	1.03257
Leukocyte Telomere Length	Lung Cancer	1.21388e-09	1.54187	1.43585	1.65571
HDL	Lung Cancer	0.576286	0.980286	0.945972	1.01584
Leukocyte Telomere Length	Lung Small Cell Carcinoma	0.679751	1.06271	0.917122	1.2314
HDL	Lung Small Cell Carcinoma	0.307868	0.925212	0.857305	0.998499
Leukocyte Telomere Length	Lung Squamous Cell Carcinoma	0.246177	0.887826	0.801255	0.98375
HDL	Lung Squamous Cell Carcinoma	0.598084	0.975059	0.929444	1.02291
Leukocyte Telomere Length	Lung Ever Smoker	3.12746e-07	1.48857	1.3772	1.60895
HDL	Lung Ever Smoker	0.317926	0.960107	0.921757	1.00005
Leukocyte Telomere Length	Lung Never Smoker	0.0162074	1.60277	1.31722	1.95023
HDL	Lung Never Smoker	0.894224	1.01152	0.928033	1.10252
Outcome ~ Leukocyte Telomere Length + Triglycerides
Exposure	Outcome	P	OR	LCI	UCI
Leukocyte Telomere Length	Lung Adenocarcinoma	7.63942e-16	2.42646	2.17374	2.70855
Triglycerides	Lung Adenocarcinoma	0.223522	1.05396	1.00942	1.10047
Leukocyte Telomere Length	Lung Cancer	7.9374e-10	1.56414	1.45434	1.68222
Triglycerides	Lung Cancer	0.339087	1.03311	0.998501	1.06892
Leukocyte Telomere Length	Lung Small Cell Carcinoma	0.489549	1.10577	0.956042	1.27894
Triglycerides	Lung Small Cell Carcinoma	0.398303	1.07076	0.987505	1.16103
Leukocyte Telomere Length	Lung Squamous Cell Carcinoma	0.254613	0.887934	0.799962	0.98558
Triglycerides	Lung Squamous Cell Carcinoma	0.519718	1.03432	0.981503	1.08998
Leukocyte Telomere Length	Lung Ever Smoker	2.3874e-07	1.50425	1.38995	1.62795
Triglycerides	Lung Ever Smoker	0.785964	1.01214	0.968142	1.05814
Leukocyte Telomere Length	Lung Never Smoker	0.00730476	1.69321	1.39141	2.06048
Triglycerides	Lung Never Smoker	0.435107	1.06982	0.981196	1.16646
Outcome ~ Leukocyte Telomere Length + Systolic Blood Pressure
Exposure	Outcome	P	OR	LCI	UCI
Leukocyte Telomere Length	Lung Adenocarcinoma	1.77233e-17	2.52127	2.26159	2.81077
Systolic Blood Pressure	Lung Adenocarcinoma	0.811325	1.02136	0.934823	1.11591
Leukocyte Telomere Length	Lung Cancer	1.57091e-10	1.59977	1.4865	1.72167
Systolic Blood Pressure	Lung Cancer	0.390904	0.938404	0.871384	1.01058
Leukocyte Telomere Length	Lung Small Cell Carcinoma	0.589813	1.08388	0.933456	1.25854
Systolic Blood Pressure	Lung Small Cell Carcinoma	0.614221	0.926389	0.796004	1.07813
Leukocyte Telomere Length	Lung Squamous Cell Carcinoma	0.753361	0.967409	0.870589	1.075
Systolic Blood Pressure	Lung Squamous Cell Carcinoma	0.309291	0.894933	0.802368	0.998177
Leukocyte Telomere Length	Lung Ever Smoker	6.13604e-07	1.48964	1.37522	1.61357
Systolic Blood Pressure	Lung Ever Smoker	0.715842	0.969064	0.888918	1.05644
Leukocyte Telomere Length	Lung Never Smoker	0.000519698	1.9405	1.60307	2.34897
Systolic Blood Pressure	Lung Never Smoker	0.352629	0.858593	0.728706	1.01163
Outcome ~ Leukocyte Telomere Length + Diastolic Blood Pressure
Exposure	Outcome	P	OR	LCI	UCI
Leukocyte Telomere Length	Lung Adenocarcinoma	5.07534e-17	2.49234	2.23516	2.77912
Diastolic Blood Pressure	Lung Adenocarcinoma	0.0287396	1.19333	1.10068	1.29377
Leukocyte Telomere Length	Lung Cancer	4.63317e-08	1.55004	1.43058	1.67948
Diastolic Blood Pressure	Lung Cancer	0.365929	1.06029	0.993812	1.13121
Leukocyte Telomere Length	Lung Small Cell Carcinoma	0.49981	0.979889	0.836864	1.14736
Diastolic Blood Pressure	Lung Small Cell Carcinoma	0.897548	1.10312	0.953803	1.27581
Leukocyte Telomere Length	Lung Squamous Cell Carcinoma	0.325556	0.893462	0.796731	1.00194
Diastolic Blood Pressure	Lung Squamous Cell Carcinoma	0.527439	0.937605	0.846724	1.03824
Leukocyte Telomere Length	Lung Ever Smoker	1.2399e-06	1.51343	1.38948	1.64845
Diastolic Blood Pressure	Lung Ever Smoker	0.949049	0.995419	0.926411	1.06957
Leukocyte Telomere Length	Lung Never Smoker	0.00100016	1.8387	1.528	2.21257
Diastolic Blood Pressure	Lung Never Smoker	0.595412	1.08798	0.928235	1.27521
Outcome ~ Leukocyte Telomere Length + Alcohol Drinks per Week
Exposure	Outcome	P	OR	LCI	UCI
Leukocyte Telomere Length	Lung Adenocarcinoma	1.99447e-18	2.50325	2.25424	2.77977
Alcohol Drinks per Week	Lung Adenocarcinoma	3.87947e-07	2.19659	1.88107	2.56502
Leukocyte Telomere Length	Lung Cancer	6.02403e-11	1.57916	1.47266	1.69338
Alcohol Drinks per Week	Lung Cancer	1.1781e-06	1.77548	1.57764	1.99812
Leukocyte Telomere Length	Lung Small Cell Carcinoma	0.970079	1.00547	0.869316	1.16296
Alcohol Drinks per Week	Lung Small Cell Carcinoma	0.71665	1.09704	0.849957	1.41596
Leukocyte Telomere Length	Lung Squamous Cell Carcinoma	0.479159	0.931775	0.843226	1.02962
Alcohol Drinks per Week	Lung Squamous Cell Carcinoma	0.00766317	1.57853	1.33017	1.87328
Leukocyte Telomere Length	Lung Ever Smoker	6.27335e-08	1.52334	1.40933	1.64657
Alcohol Drinks per Week	Lung Ever Smoker	0.00503762	1.49937	1.29774	1.73233
Leukocyte Telomere Length	Lung Never Smoker	0.00116238	1.81342	1.50977	2.17814
Alcohol Drinks per Week	Lung Never Smoker	0.0294888	1.90445	1.41661	2.56028

## Sheet: supplementary file 1h
supplementary file 1h. Summary of the colocalisation results for the LTL instrument based on 144 variants
Query SNP	avg_PP1	avg_PP2	avg_PP3	avg_PP4	Chr	Pos (hg19)	A1	A0	Z-score (LTL)	Z-score (ADE)	Is_Proxy (LTL SNP,r2)	Classification	Gene Symbol	Consequence on Transcript	cytoBand	AF (EUR 1000 Genomes)
rs116539972	9.18601e-32	6.51757e-278	0.000999309	0.999001	5	1299235	C	T	8.06963	2.44109	Yes (rs114719295,r2=1.00)	intergenic	TERT;MIR4457	.	5p15.33	0.0189
rs140648021	9.18601e-32	6.51757e-278	0.000999309	0.999001	5	1305978	G	A	5.45498	1.19865	Yes (rs115451758,r2=0.70)	intergenic	TERT;MIR4457	.	5p15.33	0.0229
rs61748181	9.18601e-32	6.51757e-278	0.000999309	0.999001	5	1294166	C	T	9.9398	1.83337	No	exonic	TERT	nonsynonymous SNV	5p15.33	0.0358
rs7705526	9.18601e-32	6.51757e-278	0.000999309	0.999001	5	1285974	C	A	-35.9063	-12.3697	No	intronic	TERT	.	5p15.33	0.337
rs139122544	2.15032e-07	6.34054e-162	0.029446	0.970554	10	105677920	G	C	6.83748	0.723849	No	UTR5	OBCF1	.	10q24.33	0.0318
rs9419958	2.15032e-07	6.34054e-162	0.029446	0.970554	10	105675946	T	C	27.5687	6.2193	No	intronic	OBCF1	.	10q24.33	0.8698
rs71593392	6.69242e-18	8.55922e-139	0.0968959	0.903104	5	1203499	T	C	5.48459	-1.06792	No	intronic	SLC6A19	.	5p15.33	0.2793
rs146546514	0.00836673	0	0.142823	0.84881	3	169553070	C	A	-9.72673	-1.43644	No	intronic	LRRIQ4	.	3q26.2	0.0278
rs12638862	0.00812314	0	0.171041	0.820836	3	169477506	A	G	37.7938	3.37829	No	intergenic	MECOM;TERC	.	3q26.2	0.2545
rs2303262	0.0470513	8.68025e-63	0.145263	0.807686	16	82203758	C	T	19.5686	4.2337	No	exonic	MPHOSPH6	nonsynonymous SNV	16q23.3	0.7853
rs2276182	0.217276	5.34367e-26	0.0192423	0.763481	18	51798047	C	G	-11.4337	-3.53848	No	intronic	POLI	.	18q21.2	0.4284
rs80150989	0.0305581	1.07211e-18	0.21281	0.756632	20	62627340	A	T	-6.02377	1.24671	No	intronic	PRPF6	.	20q13.33	0.0497
rs7790856	0.30891	5.23284e-82	0.048483	0.642607	7	124459852	C	T	19.8253	3.2562	No	intergenic	C7orf77;POT1	.	7q31.33	0.2724
rs6474018	0.360608	1.18281e-16	0.0162054	0.623186	8	56672159	C	A	9.30906	3.37703	Yes (rs10808899,r2=1.00)	intronic	TMEM68	.	8q12.1	0.8907
rs117962821	0.43313	3.62162e-25	0.279056	0.287813	18	841958	C	T	7.61664	-1.04424	No	intergenic	YES1;ADCYAP1	.	18p11.32	0.0169
rs2296176	0.741663	2.26335e-25	0.00965534	0.248682	1	114424077	G	A	11.4365	2.72271	No	ncRNA_intronic	AP4B1-AS1	.	1p13.2	0.175
rs28711261	0.699284	0.00108116	0.0482907	0.235689	16	67617186	A	G	-5.64999	2.50657	No	intronic	CTCF	.	16q22.1	0.1252
rs117630647	0.759358	1.11175e-66	0.0251996	0.215442	7	124779510	G	A	-8.26817	-0.149846	No	ncRNA_intronic	POT1-AS1	.	7q31.33	0.0169
rs2056726	0.780575	1.90335e-16	0.0196778	0.199747	7	99780283	G	A	9.36135	-2.68925	No	intronic	STAG3	.	7q22.1	0.2296
rs76374777	0.540413	0.000444659	0.268143	0.190103	1	28768043	G	C	-6.09893	-2.2998	No	intronic	PHACTR4	.	1p35.3	0.0229
rs74846577	0.760819	2.02583e-07	0.0520325	0.187146	16	74630641	G	A	-6.6035	-2.013	Yes (rs183553155,r2=1.00)	intronic	GLG1	.	16q23.1	0.0119
rs11866592	0.754327	2.31025e-07	0.0596451	0.186025	16	74654396	G	A	-12.0861	-1.61287	No	downstream	RFWD3	.	16q23.1	0.1431
rs1907702	0.674064	0.000110463	0.164711	0.160663	12	88955469	G	A	-6.1919	-2.66703	No	intronic	KITLG	.	12q21.32	0.7813
rs8105767	0.791649	1.98432e-44	0.0694436	0.138907	19	22215441	A	G	-14.9186	-2.29725	No	intergenic	ZNF208;ZNF257	.	19p12	0.2773
rs73581419	0.842974	3.53279e-08	0.0344838	0.122541	14	21941148	C	T	-7.09035	-0.770801	No	intronic	RAB2B	.	14q11.2	0.1243
rs13129697	0.663376	1.97131e-09	0.220661	0.115963	4	9926967	T	G	-7.68853	-2.12913	No	intronic	SLC2A9	.	4p16.1	0.2833
rs13062095	0.890909	2.21458e-06	0.0178587	0.0911296	3	101267385	T	C	-6.47098	-1.86996	No	intergenic	FAM172BP;TRMT10C	.	3q12.3	0.3469
rs12941945	0.906181	5.40476e-18	0.00837917	0.0854401	17	41448228	A	G	9.70048	1.91962	No	ncRNA_exonic	LINC00910	.	17q21.31	0.1759
rs76219171	0.830077	0.000709467	0.00874047	0.0825032	16	50188929	G	A	-8.3346	0.950792	No	intronic	TENT4B	.	16q12.1	0.0616
rs79127610	0.20809	1.08868e-11	0.727232	0.0646777	3	169389753	G	A	-8.54349	-2.28399	No	intergenic	MECOM;TERC	.	3q26.2	0.0229
rs3891167	0.891137	7.7699e-65	0.0442917	0.0645716	18	658423	A	G	17.7701	2.06716	No	intronic	TYMS	.	18p11.32	0.2416
rs1985369	0.923582	1.97816e-10	0.0135446	0.062873	7	159119220	A	G	10.3635	1.13062	No	intergenic	VIPR2;NONE	.	7q36.3	0.8658
rs76883411	0.857713	1.40577e-64	0.0801351	0.0621522	18	709293	G	C	6.17098	0.524012	No	intronic	ENOSF1	.	18p11.32	0.0239
rs3093888	0.922875	4.45939e-06	0.0204648	0.0564547	14	20812951	G	A	6.40345	1.81368	No	intronic	PARP2	.	14q11.2	0.0646
rs117469989	0.678785	0.0046855	0.253632	0.0503584	7	158410679	T	G	5.58938	-2.02002	No	intergenic	LINC01022;NCAPG2	.	7q36.3	0.0437
rs1881985	0.225334	1.05763e-11	0.728071	0.0465951	3	169373391	T	C	-7.72775	-1.60799	No	intronic	MECOM	.	3q26.2	0.0408
rs139897613	0.942288	1.15616e-10	0.0111576	0.0465548	3	169311210	G	C	6.80496	2.11375	No	intronic	MECOM	.	3q26.2	0.0288
rs6584607	0.842863	4.39606e-05	0.112763	0.0434756	10	106277315	C	A	-5.67352	-1.59119	No	intergenic	LINC02620;SORCS3	.	10q25.1	0.0109
rs11769630	0.950173	3.55779e-07	0.00705141	0.0427275	7	50257703	T	A	6.59367	1.66099	No	intergenic	SPATA48;IKZF1	.	7p12.2	0.0795
rs1291143	0.77058	9.75584e-64	0.192122	0.0372983	20	35525640	A	C	-17.618	-1.70488	No	intronic	SAMHD1	.	20q11.23	0.8479
rs11190184	0.952852	1.07367e-05	0.0120076	0.0343665	10	101368199	G	C	7.72773	0.119887	No	intergenic	NKX2-3;SLC25A28	.	10q24.2	0.2843
rs8051249	0.957544	1.58179e-10	0.00921984	0.0332366	16	14545264	T	C	-5.60298	-0.246183	No	intronic	PARN	.	16p13.12	0.1481
rs12613375	0.939095	2.51552e-05	0.0270673	0.0329397	2	58984109	C	T	-6.12381	1.69158	No	ncRNA_intronic	LINC01122	.	2p16.1	0.1451
rs75683534	0.937284	0.000158713	0.0235628	0.0326814	15	65116390	C	A	-5.87006	0.496573	No	exonic	PIF1	stopgain	15q22.31	0.0139
rs145114957	0.951852	6.60479e-05	0.00724599	0.0321593	1	94322469	C	G	-5.46443	-1.16097	No	intergenic	BCAR3;DNTTIP2	.	1p22.1	0.0467
rs112625468	0.928	1.30988e-08	0.0399603	0.0320394	17	76192318	C	T	-7.8578	-0.230795	No	intronic	AFMID	.	17q25.3	0.4433
rs144204502	0.927909	1.3095e-08	0.0400546	0.0320363	17	76183233	C	T	11.0113	-0.179107	No	UTR5	TK1	.	17q25.3	0.0119
rs186897010	0.838976	0.000866393	0.00539227	0.0319063	3	197858320	G	A	5.41807	0.831177	Yes (rs112394943,r2=0.60)	intergenic	ANKRD18DP;FAM157B	.	3q29	0.1412
rs6007020	0.954063	4.14747e-08	0.0150055	0.0309287	22	45790132	T	C	-6.91214	-1.80409	No	intronic	SMC1B	.	22q13.31	0.3817
rs182059586	0.96542	4.13881e-13	0.00418117	0.0303987	16	14652220	T	C	8.38887	0.258718	No	intronic	PARN	.	16p13.12	0.0169
rs2282764	0.959429	3.48536e-11	0.0112358	0.0293347	4	2255063	A	G	7.74845	2.06884	No	intronic	MXD4	.	4p16.3	0.164
rs75544730	0.964493	1.13828e-19	0.00633125	0.0291762	3	169803757	T	C	-7.21947	-1.79225	No	downstream	GPR160	.	3q26.2	0.0487
rs139795227	0.815818	0.000666527	0.00358342	0.0281869	1	92842367	A	C	-6.8638	-0.220912	No	intronic	RPAP2	.	1p22.1	0.0149
rs8053839	0.962807	1.84489e-07	0.00906274	0.0281092	16	48390512	G	T	6.80223	1.65588	No	UTR3	LONP2	.	16q12.1	0.5268
rs75664430	0.958979	7.84807e-20	0.0133224	0.0276986	17	8064779	C	G	10.1431	1.8011	No	intronic	VAMP2	.	17p13.1	0.2475
rs7218033	0.959891	3.07255e-18	0.012931	0.0271782	17	1694247	C	T	9.8115	1.727	No	intronic	SMYD4	.	17p13.3	0.2495
rs12369950	0.963661	1.65443e-05	0.00931824	0.0256475	12	24762109	T	C	6.14421	1.40284	No	intergenic	LINC00477;BCAT1	.	12p12.1	0.167
rs9600019	0.960941	3.22798e-12	0.0144812	0.024578	13	73317585	C	T	-5.96604	-1.92625	No	intronic	BORA	.	13q22.1	0.3121
rs429358	0.965826	1.54877e-05	0.0103912	0.0223275	19	45411941	T	C	-6.26141	1.28466	No	exonic	APOE	nonsynonymous SNV	19q13.32	0.1551
rs10845387	0.959238	1.38347e-06	0.0183842	0.022306	12	11757743	G	A	6.74387	-1.38591	No	intergenic	LINC01252;ETV6	.	12p13.2	0.3241
rs2081047	0.95279	0.0002065	0.0139245	0.0215611	19	33753243	G	A	-4.22846	0.652545	Yes (rs4530278,r2=0.47)	intergenic	SLC7A10;CEBPA	.	19q13.11	0.7366
rs76666449	0.972396	4.26269e-15	0.00624777	0.0213559	12	120904895	T	C	-8.85767	1.36368	No	intronic	SRSF9	.	12q24.31	0.1024
rs7020564	0.726721	0.0013592	0.00399867	0.0208991	9	109670016	A	T	-4.93308	-0.282655	Yes (rs4743037,r2=0.62)	intronic	ZNF462	.	9q31.2	0.3101
rs11579626	0.947754	9.97957e-10	0.0316319	0.0206136	1	146741960	A	C	-7.41052	1.10913	No	intronic	CHD1L;NBPF19	.	1q21.1	0.1133
rs11557154	0.973183	3.03853e-26	0.00682038	0.019997	9	34107505	C	T	11.5134	1.30193	No	exonic	DCAF12	nonsynonymous SNV	9p13.3	0.1372
rs111527438	0.960506	4.63496e-05	0.0147915	0.0198145	17	29252703	T	C	-5.92372	-1.1866	No	intronic	ADAP2	.	17q11.2	0.327
rs12615793	0.973012	2.45028e-51	0.00733602	0.0196523	2	54475914	G	A	-15.6876	-1.14607	No	intronic	ACYP2	.	2p16.2	0.1133
rs965109	0.972952	2.47095e-51	0.00739745	0.0196508	2	54473046	C	T	15.6899	0.36001	No	intronic	ACYP2	.	2p16.2	0.0338
rs80324517	0.772566	0.0260851	0.079865	0.0195567	6	204031	G	A	-8.50369	0.812962	No	ncRNA_intronic	LOC285766	.	6p25.3	0.0606
rs9878436	0.976793	3.7146e-09	0.00536639	0.0178395	3	138244400	C	T	7.10572	1.28538	No	exonic	CEP70	synonymous SNV	3q22.3	0.4483
rs10150625	0.933858	0.000448539	0.0363233	0.0178389	14	23483522	C	T	5.68305	0.951028	No	intergenic	C14orf93;PSMB5	.	14q11.2	0.0785
rs1023767	0.972998	2.88368e-11	0.00991187	0.0170905	8	95530969	G	A	7.82598	1.3557	No	intronic	VIRMA	.	8q22.1	0.3101
rs4919611	0.975131	1.00646e-11	0.00809759	0.016771	10	103894939	C	A	8.10865	-1.12326	No	intronic	PPRC1	.	10q24.32	0.8579
rs17185038	0.977401	2.64733e-06	0.00610829	0.0160641	1	28219658	C	G	6.35265	-0.308494	No	intronic	RPA2	.	1p35.3	0.0616
rs6565924	0.945829	5.7918e-06	0.0380196	0.0158658	18	74691225	A	G	-6.30171	1.34466	No	UTR3	MBP	.	18q23	0.3807
rs6751209	0.970627	5.87263e-05	0.00590394	0.0157361	2	43588302	T	C	5.65331	0.916579	No	intronic	THADA	.	2p21	0.175
rs939916	0.958515	1.29635e-23	0.0264434	0.0150411	11	202253	G	A	-11.1568	-1.25953	No	downstream	BET1L	.	11p15.5	0.6849
rs113800756	0.928103	0.000462422	0.00906427	0.0150219	17	2456432	A	C	5.66176	1.00406	No	intergenic	METTL16;PAFAH1B1	.	17p13.3	0.1541
rs11746381	0.978123	1.34587e-10	0.00730008	0.0145767	5	76284	T	C	-7.65493	-0.0971425	No	intergenic	NONE;PLEKHG4B	.	5p15.33	0.0736
rs10112752	0.979027	3.89452e-41	0.00677698	0.0141963	8	73958718	G	A	14.1974	1.3581	No	UTR3	TERF1	.	8q21.11	0.4314
rs2293579	0.966778	6.13505e-06	0.0187534	0.0141458	11	47440758	G	A	6.28525	-1.25248	No	intronic	PSMC3	.	11p11.2	0.3698
rs1609812	0.80699	4.4786e-60	0.179279	0.0137307	11	5247141	G	A	-17.043	-0.629122	No	intronic	HBB	.	11p15.4	0.83
rs1790135	0.98283	3.78145e-13	0.00378	0.0133902	12	123669235	C	T	-8.52486	-1.08586	Yes (rs1727302,r2=1.00)	intronic	MPHOSPH9	.	12q24.31	0.7247
rs762679	0.983922	2.7236e-23	0.00282806	0.0132498	8	48885436	T	A	-10.8799	-0.657525	No	exonic	MCM4	nonsynonymous SNV	8q11.21	0.8449
rs72801474	0.95613	0.000214184	0.0211555	0.0128199	5	132444128	G	A	5.88699	-0.351014	No	intergenic	HSPA4;FSTL4	.	5q31.1	0.0686
rs34003787	0.960854	1.2448e-06	0.0266238	0.0124785	16	73071381	C	T	6.71178	0.0428597	No	intronic	ZFHX3	.	16q22.3	0.0895
rs10024820	0.976417	6.14081e-09	0.0111068	0.0124761	4	122781402	T	C	7.02612	-1.05017	No	intronic	BBS7	.	4q27	0.3588
rs8088824	0.980326	6.88267e-10	0.00774822	0.0119257	18	42151261	C	T	-10.9315	0.677036	No	intergenic	LINC01601;SETBP1	.	18q12.3	0.7793
rs7209057	0.947674	0.000258146	0.0326768	0.0119042	17	65705530	G	A	-5.82604	1.28342	No	intergenic	PITPNC1;NOL11	.	17q24.2	0.5447
rs6669563	0.982396	8.42115e-13	0.00596624	0.0116378	1	32279629	G	A	-9.0064	-0.957887	No	exonic	SPOCD1	nonsynonymous SNV	1p35.2	0.4374
rs17677991	0.98286	7.1057e-22	0.00551221	0.0116278	15	42032383	C	G	-10.5625	-1.09839	No	exonic	MGA	nonsynonymous SNV	15q15.1	0.3797
rs2081601	0.978577	3.58415e-08	0.00985876	0.0115604	2	17942230	G	T	-6.05942	0.0617149	No	intronic	GEN1	.	2p24.2	0.0905
rs17445108	0.838559	0.00604305	0.0833681	0.0112454	12	57082058	G	A	5.61234	0.434591	No	UTR5	PTGES3	.	12q13.3	0.1123
rs4724	0.625832	0.00359448	0.00493857	0.0111384	17	7760397	G	A	17.5216	-0.341943	No	exonic	NAA38	synonymous SNV	17p13.1	0.0924
rs13230646	0.97439	3.35089e-09	0.0146303	0.0109798	7	23930316	T	C	7.45672	-0.875961	No	intergenic	STK31;NPY	.	7p15.3	0.2565
rs61818036	0.984583	6.0514e-09	0.00471517	0.0107012	1	151364199	G	A	7.02703	0.75779	No	intergenic	SELENBP1;PSMB4	.	1q21.3	0.8529
rs12572897	0.977384	1.87692e-22	0.0125109	0.0101053	10	96114835	G	A	10.7969	-0.269032	No	exonic	NOC3L	nonsynonymous SNV	10q23.33	0.1213
rs7101497	0.867095	4.05742e-67	0.123003	0.00990136	11	108266855	C	T	7.49907	0.0742636	No	intronic	C11orf65	.	11q22.3	0.2584
rs6867596	0.913158	9e-08	0.0770778	0.00976266	5	78962011	C	T	7.28426	-0.125226	Yes (rs6873104,r2=1.00)	intronic	TENT2	.	5q14.1	0.0964
rs2977608	0.899823	1.60126e-05	0.000121242	0.00943333	1	768253	A	C	-5.54019	-0.232331	No	ncRNA_intronic	LINC01128	.	1p36.33	0.7783
rs1332941	0.986807	2.99511e-17	0.0037722	0.00942129	13	41695100	A	G	-9.39204	-0.262844	No	intergenic	MIR3168;KBTBD6	.	13q14.11	0.826
rs2069536	0.982007	3.01342e-06	0.00812707	0.00941763	17	74001106	A	G	6.37804	-0.102034	No	ncRNA_intronic	TEN1-CDK3	.	17q25.1	0.7256
rs4660456	0.982889	1.2248e-05	0.00618355	0.00938063	1	41239511	A	G	-5.94193	-0.54583	No	intergenic	NFYC;KCNQ4	.	1p34.2	0.2227
rs7012816	0.971448	7.81377e-05	0.0137729	0.00916287	8	70964743	G	A	-5.93005	0.217164	No	intronic	PRDM14	.	8q13.3	0.1461
rs611646	0.862654	2.96969e-67	0.128352	0.00899429	11	108177097	T	A	18.0945	-0.9019	No	intronic	ATM	.	11q22.3	0.4553
rs8102497	0.984967	1.82131e-09	0.00604732	0.00898542	19	57370055	G	A	7.39653	0.264676	No	intergenic	MIMT1;USP29	.	19q13.43	0.4632
rs932002	0.984755	9.39191e-43	0.00629967	0.00894515	1	226577306	C	T	14.3761	0.35947	No	intronic	PARP1	.	1q42.12	0.1541
rs10851590	0.971323	8.42482e-05	0.00594945	0.00888896	15	55989939	C	T	5.5076	-0.748322	No	intronic	PRTG	.	15q21.3	0.497
rs41269079	0.855248	0.000588922	0.00510028	0.00888019	1	45252015	T	A	-6.02443	-0.595292	No	intronic	BEST4	.	1p34.1	0.2078
rs9398196	0.927292	6.62856e-09	0.0638538	0.00885432	6	109601554	A	G	7.13737	0.817928	No	ncRNA_intronic	CCDC162P	.	6q21	0.5298
rs4695407	0.722428	3.53231e-08	0.268892	0.00867922	4	48843372	A	G	-7.0782	-0.844373	No	intronic	OCIAD1	.	4p11	0.4483
rs3768321	0.979564	3.47206e-05	0.00686139	0.00858274	1	40035928	G	T	6.09163	0.424554	No	ncRNA_intronic	PABPC4-AS1	.	1p34.3	0.1879
rs3757387	0.735695	6.57189e-17	0.255778	0.00852724	7	128576086	T	C	10.0611	-0.810505	No	intergenic	KCP;IRF5	.	7q32.1	0.4543
rs869785	0.907135	0.00183036	0.0166227	0.00847509	3	24347800	T	C	6.9221	-0.660095	No	intronic	THRB	.	3p24.2	0.667
rs11646283	0.979647	2.02963e-09	0.0120755	0.00827781	16	9073060	T	C	-7.52424	0.759973	No	intergenic	USP7;C16orf72	.	16p13.2	0.3946
rs2230590	0.982629	5.56282e-06	0.00342851	0.00823429	3	49936102	T	C	7.86939	-0.715252	No	exonic	MST1R	nonsynonymous SNV	3p21.31	0.497
rs1003322	0.980875	3.82547e-10	0.0109725	0.00815246	22	51072289	C	A	-5.72556	-0.87868	No	intergenic	ARSA;SHANK3	.	22q13.33	0.2237
rs6054257	0.961472	0.000160535	0.00502611	0.00814351	20	66370	G	A	5.71931	0.00900215	No	intergenic	NONE;DEFB125	.	20p13	0.8012
rs35671754	0.972008	0.000127613	0.00927811	0.00797089	2	216220870	G	T	-5.67317	0.0285689	No	intergenic	ATIC;FN1	.	2q35	0.2793
rs1980240	0.9824	2.07712e-06	0.00958827	0.00783612	15	56774018	A	C	-6.34919	-0.427335	No	intergenic	MNS1;ZNF280D	.	15q21.3	0.4026
rs10840270	0.983424	3.89848e-07	0.00886378	0.00766895	11	9629553	C	G	-6.76866	-0.00573958	No	intergenic	WEE1;SWAP70	.	11p15.4	0.6342
rs10773176	0.983253	2.77365e-10	0.00908021	0.00766644	12	122944713	A	G	7.52663	0.175911	No	intergenic	CLIP1;ZCCHC8	.	12q24.31	0.7465
rs28502153	0.984529	4.11337e-21	0.00815253	0.00731888	22	17469049	C	A	10.4708	-0.496563	No	exonic	GAB4	stopgain	22q11.1	0.3698
rs12412214	0.982826	8.2599e-07	0.00963729	0.00731213	10	101276256	G	A	11.0099	-0.123979	No	intergenic	GOT1;LINC01475	.	10q24.2	0.3022
rs6659669	0.982995	3.0217e-05	0.00453565	0.00727042	1	185315067	C	T	5.70711	0.598395	No	intergenic	GS1-279B7.1;LINC01350	.	1q25.3	0.5825
rs11085072	0.731858	0.0108812	0.240138	0.00722166	19	4368142	C	T	5.56818	0.391902	No	intronic	SH3GL1	.	19p13.3	0.2336
rs66731853	0.983556	6.30309e-12	0.00949319	0.00695074	1	20916238	G	A	8.25319	0.36858	No	intronic	CDA	.	1p36.12	0.2903
rs4498805	0.985372	5.72948e-10	0.00767823	0.00694973	1	110910397	G	T	-7.51592	0.352198	No	intronic	SLC16A4	.	1p13.3	0.4891
rs5742915	0.985222	1.02241e-16	0.00791625	0.0068614	15	74336633	T	C	-9.53131	-0.417724	No	exonic	PML	nonsynonymous SNV	15q24.1	0.4384
rs17803849	0.98609	1.05934e-36	0.00723411	0.00667601	2	210673445	C	T	-13.4264	-0.393969	No	intronic	UNC80	.	2q34	0.4006
rs871134	0.985157	9.64649e-15	0.00830502	0.00653843	4	7044380	C	T	9.03055	0.229675	No	exonic	CCDC96	nonsynonymous SNV	4p16.1	0.5845
rs6776756	0.984632	7.14763e-13	0.00888108	0.00648741	3	128215821	G	A	8.56155	-0.159469	No	ncRNA_intronic	GATA2-AS1	.	3q21.3	0.6342
rs6590343	0.98403	1.74848e-05	0.00748528	0.00642481	11	128500215	A	G	-6.04332	-0.283577	No	intergenic	ETS1;LOC101929538	.	11q24.3	0.501
rs10905255	0.80137	4.45805e-14	0.192507	0.00612314	10	5870267	G	T	8.98542	0.091365	No	intergenic	GDI2;ANKRD16	.	10p15.1	0.5984
rs10852923	0.623628	0.00873074	0.0172463	0.00433794	17	2086355	T	G	5.19412	0.137372	Yes (rs4362428, r2=0.78)	intronic	SMG6	.	17p13.3	0.5229
rs62207005	0.000790648	4.5412e-44	0.996828	0.00238105	20	62251796	C	G	-10.4446	-1.87507	No	intronic	GMEB2	.	20q13.33	0.1342
rs138420497	0.000763343	1.47803e-40	0.997436	0.00180029	20	62403641	G	T	6.3826	1.82292	No	intronic	ZBTB46	.	20q13.33	0.0408
rs2738775	0.000533917	4.54829e-44	0.997858	0.00160802	20	62269839	T	C	-6.73517	-0.576213	No	intergenic	MHENCR;STMN3	.	20q13.33	0.9712
rs41304832	0.000379624	4.33609e-44	0.998519	0.00110124	20	62375508	G	A	-6.57073	-2.64434	No	UTR3	ZBTB46	.	20q13.33	0.0139
rs145170152	0.000379437	4.3361e-44	0.99852	0.00110069	20	62359630	C	T	-6.66649	-1.85897	No	intronic	ZGPAT	.	20q13.33	0.0388
rs117238689	0.000379371	4.3361e-44	0.99852	0.0011005	20	62324404	C	T	9.94273	1.92549	No	ncRNA_intronic	RTEL1-TNFRSF6B	.	20q13.33	0.0417
rs115610405	0.000379371	4.3361e-44	0.99852	0.0011005	20	62325833	C	A	14.9398	3.23918	No	exonic	RTEL1	nonsynonymous SNV	20q13.33	0.0268
rs35640778	0.000379371	4.3361e-44	0.99852	0.0011005	20	62321128	G	A	29.77	3.02547	No	exonic	RTEL1	nonsynonymous SNV	20q13.33	0.0119
rs35902944	0.000379366	4.3361e-44	0.99852	0.00110049	20	62308395	G	C	-26.3096	-2.44093	No	ncRNA_intronic	RTEL1-TNFRSF6B	.	20q13.33	0.2048
Annotation using ANNOVAR tool and dbSNP150 database
Is_Proxy if a LTL variant was not found in lung adenocarcinoma GWAS summary statistic, and replaced by a proxy variant in British/Scotish 1000 Genomes with a genetic correlation (r2).
Concordance across colocalisation methods were 94%

## Sheet: supplementary file 1i
supplementary file 1i. Summary of the Multi-trait colocalisation results for the 12 colocalised genetic loci
Loci	Gene	Query rsid	LTL	ADE	eQTL_Lung	CPD	AgeSmk	SmkInit	FVC	Posterior Probability
5p15.33	TERT;MIR4457	rs116539972	Yes	Yes	No	No	No	No	No	1
	TERT	rs61748181	Yes	Yes	No	No	No	No	No	1
	TERT	rs7705526	Yes	Yes	No	No	No	No	No	1
	TERT;MIR4457	rs140648021	Yes	Yes	No	No	No	No	No	1
	SLC6A19	rs71593392	Yes	Yes	No	No	No	No	No	1
10q24.33	OBCF1	rs139122544	Yes	Yes	Yes	No	No	No	No	0.7386
	OBCF1	rs9419958	Yes	Yes	Yes	No	No	No	No	0.7386
3q26.2	LRRIQ4	rs146546514	Yes	Yes	No	No	No	Yes	No	0.37
3q26.2	MECOM;TERC	rs12638862	Yes	Yes	No	No	No	No	No	0.898
16q23.3	MPHOSPH6	rs2303262	Yes	Yes	Yes	No	No	No	Yes	0.7206
20q13.33	PRPF6	rs80150989	No	No	No	No	No	No	No	0
18q21.2	POLI	rs2276182	Yes	Yes	Yes	No	No	No	No	0.6
Posterior probability values refer to evidence of shared genetic signals across traits part of the formed cluster
Evidence of colocalisation when posterior probability > 0.70
Traits part of the formed clusters are flagged with 'Yes'. If not included in the clusters, flagged with 'No'.

## Sheet: supplementary file 1j
supplementary file 1j. Top 500 genes positively correlated with the first 5 principal components
Coeficient	L95	U95	p-value	PC	Gene	p.bonf	Significant
0.897646	0.874954	0.916404	9.63763e-124	PC1	HNRNPK	7.17666e-119	Yes
0.89503	0.871797	0.914245	5.7175e-122	PC1	NRF1	4.25754e-117	Yes
0.891816	0.867921	0.911592	7.45189e-120	PC1	SF1	5.54905e-115	Yes
0.8882	0.863564	0.908605	1.4916e-117	PC1	ERCC3	1.11072e-112	Yes
0.884562	0.859185	0.905599	2.57041e-115	PC1	KHDRBS1	1.91405e-110	Yes
0.88434	0.858917	0.905415	3.50168e-115	PC1	TRA2B	2.60752e-110	Yes
0.883896	0.858383	0.905048	6.47455e-115	PC1	TARDBP	4.82127e-110	Yes
0.882901	0.857186	0.904225	2.54862e-114	PC1	HNRNPL	1.89783e-109	Yes
0.882679	0.856918	0.904041	3.45646e-114	PC1	UBTF	2.57385e-109	Yes
0.881766	0.85582	0.903286	1.1985e-113	PC1	SFRS1	8.92467e-109	Yes
0.881731	0.855778	0.903256	1.25737e-113	PC1	C2orf42	9.36304e-109	Yes
0.880047	0.853754	0.901863	1.21165e-112	PC1	RBM14	9.02252e-108	Yes
0.877628	0.850846	0.899861	2.96405e-111	PC1	LUC7L2	2.20718e-106	Yes
0.875696	0.848526	0.898261	3.62671e-110	PC1	ZNF207	2.70063e-105	Yes
0.87562	0.848434	0.898198	4.00039e-110	PC1	TRPC4AP	2.97889e-105	Yes
0.872406	0.844577	0.895535	2.34778e-108	PC1	SMARCAL1	1.74828e-103	Yes
0.871639	0.843656	0.894899	6.10597e-108	PC1	YTHDC1	4.54681e-103	Yes
0.871533	0.843529	0.894811	6.9652e-108	PC1	ELAVL1	5.18664e-103	Yes
0.871344	0.843302	0.894654	8.80939e-108	PC1	C20orf4	6.55992e-103	Yes
0.869554	0.841155	0.89317	7.95861e-107	PC1	RELA	5.92638e-102	Yes
0.869499	0.841089	0.893125	8.51023e-107	PC1	RBM45	6.33714e-102	Yes
0.868999	0.840489	0.89271	1.56431e-106	PC1	RBMX	1.16486e-101	Yes
0.868718	0.840152	0.892477	2.20057e-106	PC1	PCBP1	1.63865e-101	Yes
0.868241	0.83958	0.892081	3.91848e-106	PC1	GGNBP2	2.9179e-101	Yes
0.8679	0.839172	0.891799	5.90765e-106	PC1	NMT1	4.39913e-101	Yes
0.867038	0.838139	0.891083	1.66209e-105	PC1	C16orf70	1.23767e-100	Yes
0.865819	0.836677	0.890071	7.09313e-105	PC1	DPF2	5.2819e-100	Yes
0.865384	0.836157	0.889711	1.18492e-104	PC1	CAMKK2	8.82353e-100	Yes
0.864972	0.835663	0.889369	1.92536e-104	PC1	QRICH1	1.43372e-99	Yes
0.861464	0.831463	0.886456	1.12538e-102	PC1	RBM12	8.38013e-98	Yes
0.861279	0.831241	0.886302	1.3901e-102	PC1	RAB35	1.03514e-97	Yes
0.861042	0.830957	0.886105	1.82215e-102	PC1	PKNOX1	1.35687e-97	Yes
0.860987	0.830892	0.88606	1.93875e-102	PC1	CREB1	1.44369e-97	Yes
0.86094	0.830835	0.88602	2.04762e-102	PC1	CIAO1	1.52476e-97	Yes
0.860889	0.830774	0.885978	2.16901e-102	PC1	AMMECR1L	1.61515e-97	Yes
0.860837	0.830713	0.885935	2.29997e-102	PC1	THRAP3	1.71267e-97	Yes
0.86011	0.829842	0.885331	5.24948e-102	PC1	RAF1	3.90903e-97	Yes
0.85892	0.828418	0.884342	2.00707e-101	PC1	PUM2	1.49456e-96	Yes
0.858747	0.828211	0.884198	2.43653e-101	PC1	CTCF	1.81436e-96	Yes
0.858621	0.82806	0.884094	2.80494e-101	PC1	HMG20A	2.0887e-96	Yes
0.858553	0.827979	0.884037	3.02646e-101	PC1	SF3A3	2.25366e-96	Yes
0.857078	0.826216	0.882812	1.55887e-100	PC1	ZDHHC5	1.16081e-95	Yes
0.857067	0.826202	0.882802	1.5791e-100	PC1	SFRS2	1.17588e-95	Yes
0.856676	0.825734	0.882477	2.43166e-100	PC1	DHX9	1.81074e-95	Yes
0.856448	0.825463	0.882288	3.12289e-100	PC1	KIAA0652	2.32546e-95	Yes
0.856409	0.825416	0.882256	3.26001e-100	PC1	GOSR2	2.42757e-95	Yes
0.856357	0.825353	0.882212	3.45379e-100	PC1	SF3B1	2.57187e-95	Yes
0.856068	0.825008	0.881972	4.74208e-100	PC1	CNOT4	3.53119e-95	Yes
0.855135	0.823893	0.881196	1.31497e-99	PC1	CHTF8	9.79194e-95	Yes
0.855013	0.823747	0.881095	1.50196e-99	PC1	ATXN7L3	1.11843e-94	Yes
0.854323	0.822922	0.88052	3.17919e-99	PC1	RIC8A	2.36738e-94	Yes
0.854187	0.82276	0.880408	3.67993e-99	PC1	KIAA0174	2.74026e-94	Yes
0.85413	0.822691	0.88036	3.91636e-99	PC1	ELF2	2.91631e-94	Yes
0.853711	0.822191	0.880011	6.15432e-99	PC1	RSRC2	4.58281e-94	Yes
0.852593	0.820856	0.879081	2.04306e-98	PC1	IP6K1	1.52137e-93	Yes
0.852302	0.820508	0.878839	2.7886e-98	PC1	NAP1L4	2.07653e-93	Yes
0.852221	0.820412	0.878772	3.03814e-98	PC1	ZMYM4	2.26235e-93	Yes
0.852211	0.820399	0.878763	3.07304e-98	PC1	HNRPDL	2.28834e-93	Yes
0.852158	0.820336	0.878719	3.25054e-98	PC1	MAPKAP1	2.42052e-93	Yes
0.852071	0.820232	0.878647	3.56634e-98	PC1	IPO13	2.65567e-93	Yes
0.851778	0.819882	0.878403	4.87012e-98	PC1	GMEB1	3.62653e-93	Yes
0.851576	0.819641	0.878235	6.03404e-98	PC1	RNF220	4.49325e-93	Yes
0.851383	0.819411	0.878075	7.4038e-98	PC1	ARFGAP2	5.51324e-93	Yes
0.851347	0.819367	0.878044	7.6955e-98	PC1	EIF4H	5.73046e-93	Yes
0.85126	0.819263	0.877972	8.44006e-98	PC1	DDB1	6.28489e-93	Yes
0.851235	0.819234	0.877952	8.65882e-98	PC1	CPSF7	6.44779e-93	Yes
0.850963	0.818909	0.877725	1.15439e-97	PC1	FAM40A	8.59618e-93	Yes
0.850699	0.818593	0.877505	1.52636e-97	PC1	HADHA	1.1366e-92	Yes
0.850116	0.817898	0.87702	2.81633e-97	PC1	PDCD7	2.09718e-92	Yes
0.849917	0.81766	0.876854	3.47203e-97	PC1	SRRM1	2.58545e-92	Yes
0.849897	0.817636	0.876837	3.54581e-97	PC1	EIF4ENIF1	2.64039e-92	Yes
0.849819	0.817543	0.876773	3.84558e-97	PC1	SFRS13A	2.86361e-92	Yes
0.849582	0.81726	0.876575	4.93057e-97	PC1	IWS1	3.67155e-92	Yes
0.849263	0.816879	0.87631	6.87713e-97	PC1	FTSJD2	5.12106e-92	Yes
0.849151	0.816746	0.876217	7.72734e-97	PC1	GRB2	5.75417e-92	Yes
0.84894	0.816494	0.876041	9.62629e-97	PC1	FBXO7	7.16821e-92	Yes
0.848776	0.816298	0.875904	1.14224e-96	PC1	BUD13	8.50567e-92	Yes
0.848724	0.816236	0.875861	1.20495e-96	PC1	RAB5C	8.97267e-92	Yes
0.848592	0.816078	0.875751	1.38253e-96	PC1	DHX8	1.0295e-91	Yes
0.84858	0.816064	0.875741	1.40047e-96	PC1	CPSF6	1.04286e-91	Yes
0.848445	0.815903	0.875628	1.61087e-96	PC1	TLK2	1.19954e-91	Yes
0.847297	0.814533	0.874672	5.27067e-96	PC1	PTBP1	3.92481e-91	Yes
0.847053	0.814242	0.87447	6.77023e-96	PC1	ZNF830	5.04145e-91	Yes
0.847049	0.814237	0.874466	6.80161e-96	PC1	L3MBTL2	5.06482e-91	Yes
0.846957	0.814128	0.87439	7.47119e-96	PC1	CD2BP2	5.56342e-91	Yes
0.846798	0.813939	0.874257	8.79152e-96	PC1	RBM4	6.5466e-91	Yes
0.846798	0.813938	0.874257	8.79708e-96	PC1	NUP98	6.55075e-91	Yes
0.846517	0.813602	0.874023	1.17305e-95	PC1	LARP7	8.73512e-91	Yes
0.846422	0.81349	0.873944	1.2922e-95	PC1	GTF3C2	9.62235e-91	Yes
0.846416	0.813482	0.873938	1.30074e-95	PC1	YWHAB	9.68598e-91	Yes
0.846334	0.813384	0.87387	1.41463e-95	PC1	ZNF143	1.0534e-90	Yes
0.846249	0.813283	0.8738	1.54205e-95	PC1	SLC4A1AP	1.14828e-90	Yes
0.8459	0.812867	0.873509	2.20052e-95	PC1	C3orf17	1.63862e-90	Yes
0.845758	0.812697	0.87339	2.54404e-95	PC1	FBXO42	1.89442e-90	Yes
0.845144	0.811965	0.872879	4.74334e-95	PC1	MATR3	3.53213e-90	Yes
0.845133	0.811952	0.87287	4.79683e-95	PC1	GPBP1L1	3.57196e-90	Yes
0.844947	0.81173	0.872715	5.79161e-95	PC1	DAXX	4.31272e-90	Yes
0.844433	0.811118	0.872287	9.7266e-95	PC1	RNF4	7.24291e-90	Yes
0.84443	0.811114	0.872284	9.75741e-95	PC1	GORASP1	7.26585e-90	Yes
0.844369	0.811041	0.872233	1.03777e-94	PC1	SF4	7.72774e-90	Yes
0.844039	0.810648	0.871958	1.44611e-94	PC1	CUL1	1.07685e-89	Yes
0.843852	0.810425	0.871802	1.74532e-94	PC1	BRAP	1.29965e-89	Yes
0.843641	0.810173	0.871626	2.1558e-94	PC1	MKRN2	1.60531e-89	Yes
0.84362	0.810149	0.871609	2.20094e-94	PC1	SFPQ	1.63893e-89	Yes
0.843087	0.809513	0.871164	3.75317e-94	PC1	RXRB	2.7948e-89	Yes
0.84289	0.809278	0.871	4.56661e-94	PC1	CSNK1D	3.40052e-89	Yes
0.842567	0.808893	0.870731	6.3016e-94	PC1	VPS4A	4.69249e-89	Yes
0.842391	0.808684	0.870585	7.50039e-94	PC1	EWSR1	5.58517e-89	Yes
0.842248	0.808514	0.870466	8.64481e-94	PC1	TOX4	6.43736e-89	Yes
0.842093	0.808329	0.870336	1.00811e-93	PC1	TFIP11	7.50693e-89	Yes
0.841533	0.807661	0.869869	1.75523e-93	PC1	BAG5	1.30703e-88	Yes
0.841434	0.807544	0.869787	1.93475e-93	PC1	ZFP161	1.44071e-88	Yes
0.841387	0.807487	0.869747	2.02717e-93	PC1	CUL3	1.50953e-88	Yes
0.841283	0.807363	0.869661	2.24629e-93	PC1	RNF185	1.6727e-88	Yes
0.841171	0.80723	0.869567	2.50836e-93	PC1	USP19	1.86785e-88	Yes
0.840957	0.806975	0.869389	3.09674e-93	PC1	RBM23	2.30599e-88	Yes
0.84093	0.806944	0.869367	3.17753e-93	PC1	TMUB2	2.36614e-88	Yes
0.840547	0.806486	0.869047	4.63145e-93	PC1	C1orf83	3.44881e-88	Yes
0.840445	0.806365	0.868962	5.11731e-93	PC1	DDX5	3.8106e-88	Yes
0.840441	0.806361	0.868959	5.13631e-93	PC1	U2AF2	3.82476e-88	Yes
0.84017	0.806037	0.868732	6.70065e-93	PC1	METTL13	4.98964e-88	Yes
0.840063	0.80591	0.868643	7.4372e-93	PC1	SNIP1	5.53811e-88	Yes
0.840062	0.805909	0.868642	7.44625e-93	PC1	TEX261	5.54485e-88	Yes
0.839904	0.805721	0.868511	8.68724e-93	PC1	BECN1	6.46896e-88	Yes
0.83986	0.805668	0.868474	9.07015e-93	PC1	RABGEF1	6.75409e-88	Yes
0.839698	0.805476	0.868339	1.06203e-92	PC1	DEDD	7.9084e-88	Yes
0.839551	0.8053	0.868216	1.22622e-92	PC1	MSL1	9.13107e-88	Yes
0.839363	0.805076	0.868059	1.47194e-92	PC1	UBE3B	1.09608e-87	Yes
0.839284	0.804982	0.867993	1.58944e-92	PC1	ZC3H10	1.18358e-87	Yes
0.839192	0.804873	0.867917	1.73808e-92	PC1	HNRNPM	1.29426e-87	Yes
0.839106	0.80477	0.867845	1.8903e-92	PC1	RIPK1	1.40761e-87	Yes
0.83909	0.804752	0.867832	1.91816e-92	PC1	ISY1	1.42836e-87	Yes
0.83905	0.804703	0.867798	1.99585e-92	PC1	UBXN4	1.48621e-87	Yes
0.838982	0.804623	0.867742	2.13007e-92	PC1	ACAD9	1.58616e-87	Yes
0.838862	0.80448	0.867642	2.3938e-92	PC1	IMMT	1.78255e-87	Yes
0.838284	0.803792	0.867159	4.18704e-92	PC1	SART3	3.11788e-87	Yes
0.838118	0.803594	0.867021	4.91622e-92	PC1	TATDN2	3.66086e-87	Yes
0.837798	0.803213	0.866753	6.69379e-92	PC1	UNC45A	4.98453e-87	Yes
0.837761	0.80317	0.866723	6.93139e-92	PC1	ARMC8	5.16146e-87	Yes
0.837745	0.80315	0.866709	7.04224e-92	PC1	SP2	5.244e-87	Yes
0.837637	0.803022	0.86662	7.80835e-92	PC1	RANBP3	5.81449e-87	Yes
0.837629	0.803012	0.866613	7.87105e-92	PC1	VPS8	5.86118e-87	Yes
0.837622	0.803003	0.866607	7.92733e-92	PC1	RBM22	5.90309e-87	Yes
0.837384	0.80272	0.866408	9.96217e-92	PC1	FAM134A	7.41833e-87	Yes
0.837196	0.802497	0.866252	1.19248e-91	PC1	TXLNA	8.87982e-87	Yes
0.837172	0.802469	0.866232	1.22016e-91	PC1	SF3A1	9.08595e-87	Yes
0.837041	0.802312	0.866122	1.38341e-91	PC1	MAPK14	1.03016e-86	Yes
0.837026	0.802294	0.866109	1.40417e-91	PC1	KCTD10	1.04562e-86	Yes
0.837014	0.80228	0.866099	1.4206e-91	PC1	CASC3	1.05785e-86	Yes
0.836942	0.802194	0.866039	1.52135e-91	PC1	GPN2	1.13288e-86	Yes
0.836667	0.801868	0.86581	1.97782e-91	PC1	PUM1	1.47278e-86	Yes
0.836647	0.801844	0.865793	2.01605e-91	PC1	ZFAND3	1.50125e-86	Yes
0.836604	0.801792	0.865757	2.10104e-91	PC1	ACTR8	1.56454e-86	Yes
0.836602	0.801789	0.865755	2.10576e-91	PC1	ABCF3	1.56806e-86	Yes
0.836529	0.801702	0.865694	2.25813e-91	PC1	EPS15	1.68152e-86	Yes
0.836507	0.801677	0.865676	2.30538e-91	PC1	HNRNPA2B1	1.7167e-86	Yes
0.83649	0.801656	0.865662	2.34387e-91	PC1	AKAP8	1.74537e-86	Yes
0.836056	0.80114	0.8653	3.54309e-91	PC1	CNOT10	2.63836e-86	Yes
0.835965	0.801032	0.865224	3.86132e-91	PC1	EXOC7	2.87533e-86	Yes
0.835896	0.80095	0.865166	4.12348e-91	PC1	DDX23	3.07055e-86	Yes
0.835802	0.800838	0.865088	4.5096e-91	PC1	ANKRD40	3.35808e-86	Yes
0.835332	0.800279	0.864696	7.03832e-91	PC1	DYNC1I2	5.24108e-86	Yes
0.835293	0.800233	0.864663	7.30292e-91	PC1	POLR2B	5.43812e-86	Yes
0.835274	0.800209	0.864647	7.43895e-91	PC1	GLT8D1	5.53942e-86	Yes
0.835103	0.800006	0.864504	8.74212e-91	PC1	WDR48	6.50982e-86	Yes
0.835062	0.799958	0.86447	9.08668e-91	PC1	GNB1	6.76639e-86	Yes
0.835033	0.799922	0.864445	9.34467e-91	PC1	LRRC41	6.95851e-86	Yes
0.835024	0.799913	0.864439	9.41658e-91	PC1	MED17	7.01205e-86	Yes
0.834862	0.79972	0.864303	1.09756e-90	PC1	POLDIP3	8.17301e-86	Yes
0.834785	0.799628	0.864239	1.18006e-90	PC1	CWC22	8.78731e-86	Yes
0.834668	0.799489	0.864141	1.31807e-90	PC1	SUPT7L	9.81499e-86	Yes
0.834598	0.799405	0.864083	1.4081e-90	PC1	REXO4	1.04854e-85	Yes
0.834283	0.79903	0.863819	1.89395e-90	PC1	SF3B2	1.41033e-85	Yes
0.834178	0.798906	0.863732	2.08985e-90	PC1	DHX30	1.55621e-85	Yes
0.834129	0.798848	0.863691	2.18759e-90	PC1	RBM15	1.62899e-85	Yes
0.834071	0.798778	0.863642	2.31132e-90	PC1	KBTBD2	1.72113e-85	Yes
0.834	0.798694	0.863583	2.47071e-90	PC1	VPS24	1.83982e-85	Yes
0.833849	0.798515	0.863457	2.84525e-90	PC1	NAIF1	2.11871e-85	Yes
0.833739	0.798384	0.863366	3.15401e-90	PC1	ADD1	2.34863e-85	Yes
0.83367	0.798302	0.863308	3.36405e-90	PC1	AAMP	2.50504e-85	Yes
0.833621	0.798243	0.863266	3.52428e-90	PC1	BAP1	2.62436e-85	Yes
0.833518	0.798121	0.863181	3.87954e-90	PC1	SEC24C	2.8889e-85	Yes
0.833414	0.797998	0.863094	4.27409e-90	PC1	CDK13	3.1827e-85	Yes
0.833249	0.797801	0.862957	4.98541e-90	PC1	EIF2B4	3.71239e-85	Yes
0.833064	0.797582	0.862802	5.92432e-90	PC1	MTA2	4.41155e-85	Yes
0.833043	0.797556	0.862784	6.04238e-90	PC1	FAM175B	4.49946e-85	Yes
0.833009	0.797516	0.862756	6.23787e-90	PC1	DNAJC11	4.64503e-85	Yes
0.832992	0.797496	0.862742	6.33538e-90	PC1	HNRNPR	4.71764e-85	Yes
0.832985	0.797487	0.862735	6.38112e-90	PC1	ZNF317	4.7517e-85	Yes
0.832676	0.797119	0.862477	8.50911e-90	PC1	PI4KB	6.33631e-85	Yes
0.832662	0.797103	0.862466	8.61648e-90	PC1	BSDC1	6.41626e-85	Yes
0.832623	0.797057	0.862434	8.93227e-90	PC1	EFTUD2	6.65142e-85	Yes
0.831787	0.796063	0.861735	1.93887e-89	PC1	ZNF434	1.44378e-84	Yes
0.831729	0.795994	0.861686	2.04667e-89	PC1	ZFR	1.52405e-84	Yes
0.831665	0.795918	0.861633	2.17062e-89	PC1	AFTPH	1.61635e-84	Yes
0.831657	0.795909	0.861627	2.18602e-89	PC1	WDR82	1.62782e-84	Yes
0.831389	0.79559	0.861403	2.79942e-89	PC1	FEM1A	2.08458e-84	Yes
0.831258	0.795434	0.861293	3.15929e-89	PC1	YTHDF2	2.35256e-84	Yes
0.83112	0.795271	0.861178	3.58624e-89	PC1	GPATCH3	2.67049e-84	Yes
0.830975	0.795098	0.861057	4.09907e-89	PC1	WDR33	3.05237e-84	Yes
0.830854	0.794953	0.860955	4.58347e-89	PC1	PPP2R5D	3.41308e-84	Yes
0.830497	0.79453	0.860657	6.3576e-89	PC1	ACTR1A	4.73419e-84	Yes
0.830463	0.794489	0.860629	6.55947e-89	PC1	TMEM127	4.88451e-84	Yes
0.830436	0.794457	0.860606	6.72479e-89	PC1	RUNDC1	5.00762e-84	Yes
0.830422	0.794441	0.860595	6.80913e-89	PC1	CNP	5.07042e-84	Yes
0.830379	0.794389	0.860558	7.08619e-89	PC1	CWC25	5.27673e-84	Yes
0.830198	0.794174	0.860407	8.36028e-89	PC1	DBR1	6.22548e-84	Yes
0.829959	0.79389	0.860208	1.04025e-88	PC1	GTF2H1	7.7462e-84	Yes
0.829948	0.793877	0.860199	1.05066e-88	PC1	FUBP3	7.82377e-84	Yes
0.829868	0.793782	0.860131	1.13069e-88	PC1	TAF5L	8.41966e-84	Yes
0.829855	0.793767	0.860121	1.14398e-88	PC1	PPP1R8	8.51867e-84	Yes
0.829669	0.793545	0.859965	1.35584e-88	PC1	DHDDS	1.00963e-83	Yes
0.829665	0.793541	0.859962	1.3605e-88	PC1	ARIH2	1.0131e-83	Yes
0.829608	0.793474	0.859915	1.43256e-88	PC1	SFRS7	1.06675e-83	Yes
0.829598	0.793461	0.859906	1.44587e-88	PC1	THAP11	1.07667e-83	Yes
0.829569	0.793427	0.859881	1.48511e-88	PC1	PRPF4B	1.10589e-83	Yes
0.829491	0.793335	0.859817	1.59345e-88	PC1	WDR92	1.18656e-83	Yes
0.829295	0.793101	0.859652	1.90587e-88	PC1	2022-03-07	1.41921e-83	Yes
0.829215	0.793006	0.859586	2.04942e-88	PC1	NCOA5	1.5261e-83	Yes
0.829085	0.792852	0.859477	2.30571e-88	PC1	SIN3A	1.71695e-83	Yes
0.82894	0.79268	0.859356	2.63014e-88	PC1	ILF3	1.95853e-83	Yes
0.828736	0.792437	0.859185	3.16589e-88	PC1	CAPN7	2.35748e-83	Yes
0.828609	0.792286	0.859079	3.55213e-88	PC1	C20orf43	2.64509e-83	Yes
0.828514	0.792173	0.859	3.87099e-88	PC1	XPO6	2.88253e-83	Yes
0.828504	0.792162	0.858992	3.90307e-88	PC1	SRCAP	2.90642e-83	Yes
0.828457	0.792106	0.858952	4.07339e-88	PC1	PTPN9	3.03325e-83	Yes
0.8284	0.792038	0.858904	4.29082e-88	PC1	C4orf41	3.19516e-83	Yes
0.828258	0.79187	0.858786	4.87657e-88	PC1	C12orf43	3.63134e-83	Yes
0.828179	0.791776	0.85872	5.23826e-88	PC1	EXOSC10	3.90067e-83	Yes
0.828072	0.791649	0.858631	5.76667e-88	PC1	GTF2F1	4.29415e-83	Yes
0.827987	0.791548	0.858559	6.22742e-88	PC1	KDM4A	4.63725e-83	Yes
0.827633	0.791127	0.858263	8.56846e-88	PC1	C10orf28	6.3805e-83	Yes
0.827628	0.791121	0.858259	8.60496e-88	PC1	TBC1D10B	6.40768e-83	Yes
0.827394	0.790843	0.858063	1.06253e-87	PC1	ASB8	7.91212e-83	Yes
0.82731	0.790744	0.857993	1.14545e-87	PC1	ECD	8.52956e-83	Yes
0.827299	0.79073	0.857984	1.15697e-87	PC1	SNW1	8.61537e-83	Yes
0.827296	0.790727	0.857982	1.15987e-87	PC1	LRRC47	8.63694e-83	Yes
0.827285	0.790714	0.857973	1.17097e-87	PC1	RPP14	8.71966e-83	Yes
0.827214	0.79063	0.857913	1.2485e-87	PC1	C1orf144	9.29696e-83	Yes
0.827177	0.790585	0.857882	1.29105e-87	PC1	COBRA1	9.61383e-83	Yes
0.826969	0.790339	0.857708	1.55496e-87	PC1	NRBP1	1.1579e-82	Yes
0.826891	0.790246	0.857643	1.66778e-87	PC1	SCAP	1.24191e-82	Yes
0.826889	0.790244	0.857642	1.67013e-87	PC1	WDR1	1.24366e-82	Yes
0.826882	0.790235	0.857635	1.68185e-87	PC1	HELQ	1.25239e-82	Yes
0.826852	0.790199	0.85761	1.72742e-87	PC1	PANK2	1.28633e-82	Yes
0.826682	0.789998	0.857468	2.01108e-87	PC1	SFRS4	1.49755e-82	Yes
0.826677	0.789992	0.857464	2.01894e-87	PC1	ZFP64	1.5034e-82	Yes
0.826598	0.789899	0.857398	2.16645e-87	PC1	TINF2	1.61325e-82	Yes
0.826576	0.789873	0.85738	2.2097e-87	PC1	SPOP	1.64545e-82	Yes
0.826566	0.78986	0.857371	2.2305e-87	PC1	EIF4G2	1.66094e-82	Yes
0.826545	0.789836	0.857354	2.27192e-87	PC1	RBM15B	1.69179e-82	Yes
0.826506	0.789789	0.857321	2.35314e-87	PC1	C3orf19	1.75227e-82	Yes
0.826505	0.789788	0.85732	2.35551e-87	PC1	C16orf72	1.75403e-82	Yes
0.826471	0.789748	0.857292	2.42672e-87	PC1	VRK3	1.80706e-82	Yes
0.826345	0.789598	0.857186	2.71739e-87	PC1	MMS19	2.02351e-82	Yes
0.826259	0.789496	0.857115	2.93239e-87	PC1	TAB1	2.1836e-82	Yes
0.826114	0.789324	0.856993	3.33716e-87	PC1	PIP4K2B	2.48501e-82	Yes
0.825858	0.789019	0.856779	4.19408e-87	PC1	PHAX	3.12312e-82	Yes
0.825787	0.788935	0.856719	4.46737e-87	PC1	SYNCRIP	3.32663e-82	Yes
0.825755	0.788897	0.856693	4.59668e-87	PC1	VPS11	3.42292e-82	Yes
0.825564	0.788671	0.856533	5.44415e-87	PC1	ZNF746	4.05398e-82	Yes
0.825493	0.788587	0.856474	5.79639e-87	PC1	PPP6C	4.31628e-82	Yes
0.825279	0.788333	0.856295	7.00849e-87	PC1	ZNF174	5.21888e-82	Yes
0.825222	0.788265	0.856247	7.37185e-87	PC1	EDC3	5.48945e-82	Yes
0.8252	0.788238	0.856228	7.52111e-87	PC1	WIPI2	5.60059e-82	Yes
0.825182	0.788217	0.856213	7.6426e-87	PC1	DNAJC14	5.69106e-82	Yes
0.825123	0.788147	0.856164	8.0509e-87	PC1	SAPS3	5.9951e-82	Yes
0.82509	0.788108	0.856136	8.2909e-87	PC1	SNAP47	6.17382e-82	Yes
0.825067	0.78808	0.856117	8.46097e-87	PC1	PDCL	6.30046e-82	Yes
0.825066	0.788079	0.856116	8.46791e-87	PC1	LEMD2	6.30563e-82	Yes
0.824991	0.787991	0.856054	9.0431e-87	PC1	PRKACA	6.73394e-82	Yes
0.824658	0.787595	0.855775	1.21446e-86	PC1	CDC23	9.04349e-82	Yes
0.824336	0.787214	0.855506	1.61241e-86	PC1	TUBGCP2	1.20068e-81	Yes
0.824171	0.787018	0.855368	1.86455e-86	PC1	RNF20	1.38844e-81	Yes
0.82407	0.786898	0.855284	2.03752e-86	PC1	PLEKHM2	1.51724e-81	Yes
0.823819	0.7866	0.855073	2.54128e-86	PC1	PCIF1	1.89236e-81	Yes
0.823811	0.78659	0.855066	2.55978e-86	PC1	APPBP2	1.90614e-81	Yes
0.823644	0.786392	0.854927	2.96337e-86	PC1	DHX35	2.20667e-81	Yes
0.823639	0.786386	0.854923	2.97625e-86	PC1	RAB3GAP1	2.21627e-81	Yes
0.823559	0.786292	0.854856	3.19119e-86	PC1	COG8	2.37632e-81	Yes
0.823478	0.786195	0.854788	3.42856e-86	PC1	KLHL18	2.55308e-81	Yes
0.823453	0.786166	0.854767	3.50207e-86	PC1	PSME3	2.60782e-81	Yes
0.823422	0.786129	0.854741	3.59938e-86	PC1	SH3BP5L	2.68028e-81	Yes
0.823318	0.786006	0.854654	3.94192e-86	PC1	TIAL1	2.93535e-81	Yes
0.82331	0.785996	0.854648	3.97036e-86	PC1	SAP30BP	2.95653e-81	Yes
0.823066	0.785707	0.854444	4.91307e-86	PC1	SLC35A4	3.65852e-81	Yes
0.823049	0.785687	0.85443	4.9863e-86	PC1	TNFAIP1	3.71305e-81	Yes
0.823031	0.785665	0.854414	5.06816e-86	PC1	FBXO18	3.774e-81	Yes
0.822999	0.785627	0.854387	5.21165e-86	PC1	RIC8B	3.88085e-81	Yes
0.82299	0.785616	0.854379	5.25364e-86	PC1	WAC	3.91212e-81	Yes
0.822912	0.785523	0.854314	5.62442e-86	PC1	FBXL12	4.18822e-81	Yes
0.822726	0.785304	0.854159	6.61086e-86	PC1	RPA1	4.92277e-81	Yes
0.822706	0.785279	0.854142	6.73177e-86	PC1	COPS7B	5.01281e-81	Yes
0.822612	0.785168	0.854063	7.30555e-86	PC1	RAB14	5.44008e-81	Yes
0.822422	0.784943	0.853905	8.61655e-86	PC1	TYW1	6.41632e-81	Yes
0.822421	0.784941	0.853904	8.62602e-86	PC1	TTC31	6.42337e-81	Yes
0.82211	0.784572	0.853643	1.13048e-85	PC1	RNF10	8.4181e-81	Yes
0.821956	0.78439	0.853515	1.2916e-85	PC1	SFRS3	9.61787e-81	Yes
0.821895	0.784318	0.853464	1.36195e-85	PC1	ISG20L2	1.01418e-80	Yes
0.821802	0.784207	0.853386	1.47654e-85	PC1	HADHB	1.0995e-80	Yes
0.821687	0.78407	0.853289	1.63202e-85	PC1	XRCC5	1.21528e-80	Yes
0.821635	0.784009	0.853245	1.70708e-85	PC1	BCLAF1	1.27118e-80	Yes
0.821502	0.783851	0.853134	1.9148e-85	PC1	UBE2Z	1.42585e-80	Yes
0.821499	0.783848	0.853132	1.91961e-85	PC1	TFCP2	1.42944e-80	Yes
0.821489	0.783836	0.853124	1.93613e-85	PC1	VTI1A	1.44174e-80	Yes
0.821478	0.783823	0.853114	1.9551e-85	PC1	TRIM32	1.45587e-80	Yes
0.821415	0.783749	0.853062	2.06406e-85	PC1	DCAF17	1.537e-80	Yes
0.821378	0.783705	0.853031	2.13125e-85	PC1	SP3	1.58704e-80	Yes
0.821364	0.783687	0.853019	2.15835e-85	PC1	MFAP3	1.60721e-80	Yes
0.82133	0.783648	0.852991	2.22124e-85	PC1	MARK3	1.65404e-80	Yes
0.82125	0.783553	0.852924	2.38051e-85	PC1	PPFIA1	1.77265e-80	Yes
0.821244	0.783545	0.852918	2.39428e-85	PC1	VPS33B	1.7829e-80	Yes
0.821237	0.783537	0.852912	2.409e-85	PC1	HNRNPA0	1.79386e-80	Yes
0.821186	0.783477	0.85287	2.51616e-85	PC1	STARD7	1.87366e-80	Yes
0.821121	0.7834	0.852815	2.66179e-85	PC1	RNF121	1.9821e-80	Yes
0.821065	0.783333	0.852768	2.79467e-85	PC1	ASB7	2.08105e-80	Yes
0.820814	0.783035	0.852558	3.46866e-85	PC1	MAEA	2.58294e-80	Yes
0.820778	0.782993	0.852528	3.57805e-85	PC1	AZI2	2.6644e-80	Yes
0.820725	0.782931	0.852484	3.74349e-85	PC1	ZNF263	2.78759e-80	Yes
0.8207	0.7829	0.852463	3.82653e-85	PC1	TMEM184C	2.84942e-80	Yes
0.820567	0.782743	0.852352	4.28926e-85	PC1	SAMM50	3.194e-80	Yes
0.820544	0.782715	0.852332	4.37714e-85	PC1	GOLGA1	3.25944e-80	Yes
0.820443	0.782595	0.852248	4.77415e-85	PC1	FCF1	3.55507e-80	Yes
0.820291	0.782416	0.852121	5.43832e-85	PC1	TBC1D20	4.04964e-80	Yes
0.820247	0.782363	0.852084	5.6493e-85	PC1	GIT2	4.20675e-80	Yes
0.820219	0.78233	0.85206	5.78648e-85	PC1	FAM104A	4.3089e-80	Yes
0.820196	0.782303	0.852041	5.90103e-85	PC1	EXOC2	4.3942e-80	Yes
0.820171	0.782273	0.85202	6.02824e-85	PC1	ABI1	4.48893e-80	Yes
0.820112	0.782203	0.851971	6.34307e-85	PC1	RNF40	4.72337e-80	Yes
0.820025	0.782099	0.851897	6.83693e-85	PC1	VCP	5.09112e-80	Yes
0.820016	0.782089	0.85189	6.8866e-85	PC1	UBE2I	5.12811e-80	Yes
0.819884	0.781932	0.851779	7.71451e-85	PC1	DDX19A	5.74461e-80	Yes
0.819786	0.781817	0.851698	8.38707e-85	PC1	GLYR1	6.24544e-80	Yes
0.819583	0.781576	0.851528	9.97523e-85	PC1	DEPDC5	7.42806e-80	Yes
0.819482	0.781457	0.851443	1.08752e-84	PC1	SRBD1	8.09822e-80	Yes
0.819441	0.781407	0.851409	1.12677e-84	PC1	AP3M1	8.39052e-80	Yes
0.819418	0.781381	0.85139	1.14871e-84	PC1	SAP130	8.5539e-80	Yes
0.819345	0.781294	0.851328	1.2229e-84	PC1	RAB1A	9.10634e-80	Yes
0.819265	0.781199	0.851261	1.30913e-84	PC1	PRPF40A	9.74841e-80	Yes
0.819251	0.781182	0.851249	1.32537e-84	PC1	DIS3L2	9.86938e-80	Yes
0.819234	0.781162	0.851235	1.34441e-84	PC1	DDX20	1.00111e-79	Yes
0.819122	0.781029	0.851141	1.4793e-84	PC1	WDR20	1.10156e-79	Yes
0.819104	0.781009	0.851127	1.50152e-84	PC1	ACTR2	1.11811e-79	Yes
0.81902	0.780908	0.851056	1.61386e-84	PC1	C15orf44	1.20176e-79	Yes
0.818879	0.780741	0.850938	1.8197e-84	PC1	CAPRIN1	1.35504e-79	Yes
0.818865	0.780725	0.850926	1.84108e-84	PC1	SRP68	1.37096e-79	Yes
0.81866	0.780482	0.850754	2.19268e-84	PC1	GOSR1	1.63278e-79	Yes
0.818623	0.780439	0.850724	2.26136e-84	PC1	RNF111	1.68393e-79	Yes
0.818554	0.780357	0.850666	2.39798e-84	PC1	NUP62	1.78566e-79	Yes
0.818481	0.78027	0.850605	2.55241e-84	PC1	ZKSCAN5	1.90065e-79	Yes
0.818444	0.780226	0.850574	2.63356e-84	PC1	PRPF38A	1.96108e-79	Yes
0.818416	0.780193	0.85055	2.69738e-84	PC1	PITPNB	2.0086e-79	Yes
0.818278	0.78003	0.850435	3.03081e-84	PC1	HECTD3	2.25689e-79	Yes
0.818247	0.779993	0.850409	3.11125e-84	PC1	VPS16	2.31679e-79	Yes
0.818242	0.779986	0.850404	3.12615e-84	PC1	PHF20	2.32788e-79	Yes
0.818209	0.779947	0.850377	3.21464e-84	PC1	API5	2.39378e-79	Yes
0.818112	0.779833	0.850296	3.48931e-84	PC1	RBM16	2.59832e-79	Yes
0.818047	0.779756	0.850242	3.68629e-84	PC1	PITPNA	2.74499e-79	Yes
0.818041	0.779748	0.850236	3.70658e-84	PC1	BTBD1	2.7601e-79	Yes
0.817607	0.779234	0.849873	5.35014e-84	PC1	PRPF38B	3.98398e-79	Yes
0.817594	0.779219	0.849862	5.40714e-84	PC1	SNX17	4.02643e-79	Yes
0.817559	0.779177	0.849832	5.57312e-84	PC1	SRRT	4.15002e-79	Yes
0.817458	0.779058	0.849748	6.06699e-84	PC1	PALB2	4.51778e-79	Yes
0.817381	0.778967	0.849684	6.47178e-84	PC1	NDUFA10	4.81921e-79	Yes
0.817269	0.778833	0.849589	7.11824e-84	PC1	EIF2B5	5.3006e-79	Yes
0.817237	0.778795	0.849562	7.31289e-84	PC1	LARS2	5.44554e-79	Yes
0.817219	0.778774	0.849547	7.42342e-84	PC1	STK25	5.52785e-79	Yes
0.817107	0.778641	0.849453	8.15873e-84	PC1	RABEP1	6.0754e-79	Yes
0.817071	0.778599	0.849424	8.40578e-84	PC1	ATG9A	6.25936e-79	Yes
0.817036	0.778557	0.849394	8.66173e-84	PC1	MFN2	6.44996e-79	Yes
0.816976	0.778486	0.849344	9.10832e-84	PC1	TRAF6	6.78251e-79	Yes
0.816936	0.778439	0.84931	9.41917e-84	PC1	CSTF1	7.01398e-79	Yes
0.816919	0.77842	0.849297	9.55149e-84	PC1	PDCD6IP	7.11252e-79	Yes
0.816919	0.778419	0.849296	9.55441e-84	PC1	AMBRA1	7.11469e-79	Yes
0.816918	0.778418	0.849295	9.56217e-84	PC1	C6orf89	7.12047e-79	Yes
0.816887	0.778382	0.84927	9.81057e-84	PC1	MOGS	7.30544e-79	Yes
0.816757	0.778228	0.849161	1.09443e-83	PC1	EPS15L1	8.14965e-79	Yes
0.816755	0.778225	0.849159	1.09684e-83	PC1	BRPF1	8.16763e-79	Yes
0.816753	0.778223	0.849157	1.09818e-83	PC1	EXOC4	8.17759e-79	Yes
0.816657	0.778108	0.849076	1.19116e-83	PC1	ADO	8.86995e-79	Yes
0.816653	0.778104	0.849073	1.19502e-83	PC1	ZC3H18	8.89872e-79	Yes
0.816541	0.777972	0.84898	1.31233e-83	PC1	ATG3	9.77228e-79	Yes
0.816393	0.777796	0.848856	1.48573e-83	PC1	MIOS	1.10635e-78	Yes
0.816369	0.777768	0.848836	1.51606e-83	PC1	ZNF526	1.12894e-78	Yes
0.81632	0.77771	0.848795	1.57936e-83	PC1	RBMXL1	1.17607e-78	Yes
0.81624	0.777615	0.848727	1.68954e-83	PC1	PPP2R4	1.25811e-78	Yes
0.816078	0.777422	0.848591	1.93546e-83	PC1	ZBTB11	1.44124e-78	Yes
0.81607	0.777413	0.848585	1.94779e-83	PC1	MKRN1	1.45042e-78	Yes
0.816034	0.777371	0.848555	2.00765e-83	PC1	BAT5	1.495e-78	Yes
0.816029	0.777365	0.84855	2.01578e-83	PC1	MLH1	1.50105e-78	Yes
0.816027	0.777363	0.848549	2.01855e-83	PC1	THUMPD3	1.50311e-78	Yes
0.816024	0.777359	0.848546	2.02477e-83	PC1	POLG	1.50775e-78	Yes
0.815896	0.777207	0.848439	2.25314e-83	PC1	ZNF740	1.6778e-78	Yes
0.815895	0.777207	0.848438	2.25414e-83	PC1	SEC24B	1.67855e-78	Yes
0.815887	0.777197	0.848431	2.27005e-83	PC1	TMEM170A	1.69039e-78	Yes
0.815813	0.777109	0.84837	2.414e-83	PC1	DHX16	1.79759e-78	Yes
0.815726	0.777006	0.848297	2.59603e-83	PC1	KIAA1267	1.93313e-78	Yes
0.815687	0.77696	0.848264	2.68167e-83	PC1	METTL14	1.99691e-78	Yes
0.815686	0.776959	0.848263	2.68417e-83	PC1	PANK4	1.99877e-78	Yes
0.815614	0.776874	0.848203	2.85017e-83	PC1	FUS	2.12238e-78	Yes
0.815501	0.77674	0.848108	3.13305e-83	PC1	SDAD1	2.33303e-78	Yes
0.815475	0.776709	0.848087	3.20018e-83	PC1	E2F4	2.38301e-78	Yes
0.815456	0.776687	0.848071	3.25214e-83	PC1	PSEN1	2.42171e-78	Yes
0.815448	0.776677	0.848064	3.27344e-83	PC1	C4orf23	2.43756e-78	Yes
0.81544	0.776668	0.848057	3.29597e-83	PC1	KAT5	2.45435e-78	Yes
0.815369	0.776583	0.847997	3.49805e-83	PC1	CEP63	2.60483e-78	Yes
0.815264	0.776458	0.847909	3.8183e-83	PC1	CDK9	2.8433e-78	Yes
0.815216	0.776403	0.84787	3.97079e-83	PC1	C7orf42	2.95685e-78	Yes
0.815207	0.776392	0.847862	4.0019e-83	PC1	PPIL4	2.98001e-78	Yes
0.81517	0.776348	0.847831	4.12701e-83	PC1	RNF31	3.07318e-78	Yes
0.815139	0.776311	0.847804	4.23662e-83	PC1	ZCCHC8	3.1548e-78	Yes
0.815109	0.776275	0.84778	4.34214e-83	PC1	RNF123	3.23337e-78	Yes
0.815101	0.776266	0.847773	4.37183e-83	PC1	UNK	3.25549e-78	Yes
0.815083	0.776245	0.847758	4.43752e-83	PC1	ATRIP	3.3044e-78	Yes
0.815038	0.776191	0.84772	4.60706e-83	PC1	SMCR7L	3.43065e-78	Yes
0.81495	0.776087	0.847646	4.95561e-83	PC1	ZNF498	3.6902e-78	Yes
0.814947	0.776084	0.847644	4.9679e-83	PC1	HMGXB4	3.69934e-78	Yes
0.814945	0.776082	0.847642	4.97543e-83	PC1	AGPAT1	3.70495e-78	Yes
0.814892	0.776019	0.847598	5.19951e-83	PC1	SURF4	3.87182e-78	Yes
0.814866	0.775988	0.847576	5.31351e-83	PC1	DNPEP	3.95671e-78	Yes
0.81481	0.775922	0.847529	5.56626e-83	PC1	ATP6V1A	4.14491e-78	Yes
0.814629	0.775707	0.847377	6.47181e-83	PC1	TM9SF4	4.81923e-78	Yes
0.814586	0.775656	0.847341	6.70604e-83	PC1	NGLY1	4.99365e-78	Yes
0.814507	0.775563	0.847275	7.15629e-83	PC1	FBXO11	5.32893e-78	Yes
0.814255	0.775264	0.847063	8.82231e-83	PC1	FAM20B	6.56953e-78	Yes
0.814226	0.77523	0.84704	9.03333e-83	PC1	FAF1	6.72667e-78	Yes
0.814218	0.77522	0.847033	9.0949e-83	PC1	C10orf46	6.77252e-78	Yes
0.814163	0.775155	0.846987	9.51652e-83	PC1	STAU1	7.08647e-78	Yes
0.814112	0.775095	0.846944	9.92418e-83	PC1	MAX	7.39004e-78	Yes
0.814013	0.774978	0.846861	1.07735e-82	PC1	SFRS6	8.02252e-78	Yes
0.813965	0.774921	0.84682	1.12117e-82	PC1	BAT4	8.34878e-78	Yes
0.813947	0.7749	0.846806	1.13732e-82	PC1	DAZAP1	8.46905e-78	Yes
0.813911	0.774857	0.846776	1.1719e-82	PC1	INTS6	8.72654e-78	Yes
0.813887	0.774829	0.846755	1.19551e-82	PC1	FNTB	8.90233e-78	Yes
0.813853	0.774789	0.846727	1.22943e-82	PC1	CLP1	9.15498e-78	Yes
0.813835	0.774767	0.846712	1.24766e-82	PC1	USP33	9.29067e-78	Yes
0.813811	0.774739	0.846692	1.27249e-82	PC1	PRPSAP1	9.47557e-78	Yes
0.813768	0.774688	0.846655	1.31908e-82	PC1	WAPAL	9.82252e-78	Yes
0.813709	0.774618	0.846606	1.38509e-82	PC1	ZBTB2	1.03141e-77	Yes
0.813559	0.77444	0.84648	1.56743e-82	PC1	C10orf76	1.16718e-77	Yes
0.81354	0.774418	0.846465	1.59125e-82	PC1	SLC35C2	1.18492e-77	Yes
0.813511	0.774384	0.84644	1.63027e-82	PC1	ZMAT2	1.21398e-77	Yes
0.813465	0.77433	0.846402	1.6927e-82	PC1	TRIM26	1.26047e-77	Yes
0.813427	0.774284	0.846369	1.74732e-82	PC1	VPRBP	1.30114e-77	Yes
0.813426	0.774282	0.846368	1.74901e-82	PC1	OGFOD1	1.3024e-77	Yes
0.813384	0.774233	0.846333	1.81052e-82	PC1	SMU1	1.3482e-77	Yes
0.813337	0.774178	0.846294	1.88145e-82	PC1	ARPC2	1.40102e-77	Yes
0.813232	0.774054	0.846206	2.05061e-82	PC1	NRD1	1.52699e-77	Yes
0.813206	0.774022	0.846184	2.0957e-82	PC1	OSBP	1.56056e-77	Yes
0.813206	0.774022	0.846184	2.09593e-82	PC1	BRD2	1.56073e-77	Yes
0.813188	0.774001	0.846169	2.12738e-82	PC1	HIAT1	1.58415e-77	Yes
0.81318	0.773992	0.846162	2.14089e-82	PC1	EHMT1	1.59421e-77	Yes
0.81316	0.773968	0.846145	2.17708e-82	PC1	PIAS4	1.62117e-77	Yes
0.813112	0.773911	0.846106	2.26389e-82	PC1	SMARCAD1	1.68581e-77	Yes
0.813066	0.773857	0.846067	2.35042e-82	PC1	HNRNPH3	1.75024e-77	Yes
0.813011	0.773791	0.846021	2.4602e-82	PC1	ZMYM6	1.83199e-77	Yes
0.812949	0.773718	0.845969	2.58817e-82	PC1	DCAF7	1.92728e-77	Yes
0.812794	0.773535	0.845839	2.93819e-82	PC1	MSL3	2.18792e-77	Yes
0.812594	0.773298	0.845671	3.463e-82	PC1	PICALM	2.57873e-77	Yes
0.812513	0.773202	0.845603	3.70137e-82	PC1	KLHL12	2.75623e-77	Yes
0.812445	0.773122	0.845547	3.91096e-82	PC1	C19orf50	2.9123e-77	Yes
0.812441	0.773117	0.845542	3.92692e-82	PC1	KCTD18	2.92418e-77	Yes
0.81242	0.773093	0.845526	3.99183e-82	PC1	SEC31A	2.97252e-77	Yes
0.812256	0.772898	0.845388	4.56743e-82	PC1	USP7	3.40114e-77	Yes
0.812235	0.772874	0.84537	4.6445e-82	PC1	HDAC3	3.45853e-77	Yes
0.812203	0.772835	0.845343	4.76911e-82	PC1	AP1B1	3.55132e-77	Yes
0.812196	0.772827	0.845337	4.7972e-82	PC1	CYBASC3	3.57224e-77	Yes
0.812171	0.772798	0.845317	4.89395e-82	PC1	MBD1	3.64428e-77	Yes
0.811912	0.772491	0.845099	6.05012e-82	PC1	CDC40	4.50522e-77	Yes
0.811873	0.772445	0.845066	6.24492e-82	PC1	MARK2	4.65028e-77	Yes
0.811811	0.772372	0.845015	6.56745e-82	PC1	EIF1AD	4.89045e-77	Yes
0.811809	0.77237	0.845013	6.57658e-82	PC1	SEC61A1	4.89725e-77	Yes
0.811748	0.772298	0.844962	6.91138e-82	PC1	EIF2B1	5.14656e-77	Yes
0.811694	0.772234	0.844917	7.22319e-82	PC1	HMGXB3	5.37875e-77	Yes
0.811693	0.772232	0.844916	7.22877e-82	PC1	TRIM39	5.38291e-77	Yes
0.811686	0.772224	0.84491	7.27289e-82	PC1	DULLARD	5.41575e-77	Yes
0.81166	0.772193	0.844888	7.42848e-82	PC1	NSFL1C	5.53161e-77	Yes
0.811642	0.772172	0.844873	7.53808e-82	PC1	DDX6	5.61323e-77	Yes
0.811517	0.772023	0.844768	8.34815e-82	PC1	PRDM10	6.21645e-77	Yes
0.811417	0.771905	0.844684	9.05486e-82	PC1	ZBTB1	6.7427e-77	Yes
0.811362	0.771841	0.844638	9.46541e-82	PC1	PRDM4	7.04842e-77	Yes
0.811259	0.771718	0.844552	1.02948e-81	PC1	PIGO	7.66601e-77	Yes
0.811075	0.7715	0.844397	1.19578e-81	PC1	SPTLC1	8.9044e-77	Yes
0.81105	0.771472	0.844377	1.21968e-81	PC1	INTS4	9.08238e-77	Yes
0.810992	0.771402	0.844327	1.27908e-81	PC1	SRF	9.52467e-77	Yes
0.81099	0.771401	0.844326	1.28042e-81	PC1	CIZ1	9.53464e-77	Yes
0.81096	0.771364	0.844301	1.31262e-81	PC1	MBD4	9.77442e-77	Yes
0.810927	0.771325	0.844273	1.34827e-81	PC1	WDR11	1.00399e-76	Yes
0.810923	0.771321	0.84427	1.35192e-81	PC1	VIPAR	1.00671e-76	Yes
0.810852	0.771237	0.84421	1.43259e-81	PC1	GPBP1	1.06678e-76	Yes
0.810827	0.771207	0.844189	1.46241e-81	PC1	AKT2	1.08898e-76	Yes
0.810716	0.771076	0.844096	1.59992e-81	PC1	TRIP4	1.19138e-76	Yes
0.810634	0.770979	0.844027	1.70923e-81	PC1	WTAP	1.27278e-76	Yes
0.810422	0.770729	0.84385	2.02874e-81	PC1	C17orf71	1.5107e-76	Yes
0.810384	0.770683	0.843817	2.09304e-81	PC1	RAB7A	1.55858e-76	Yes
0.810371	0.770668	0.843807	2.11491e-81	PC1	DDX50	1.57487e-76	Yes
0.810276	0.770556	0.843727	2.28259e-81	PC1	TBC1D22B	1.69973e-76	Yes
0.810257	0.770533	0.843711	2.31831e-81	PC1	GZF1	1.72633e-76	Yes
0.810189	0.770452	0.843654	2.45056e-81	PC1	PRCC	1.82481e-76	Yes
0.810178	0.77044	0.843645	2.4711e-81	PC1	TTC4	1.84011e-76	Yes
0.762282	0.714101	0.803276	1.37116e-66	PC2	C1QTNF7	1.02104e-61	Yes
0.749742	0.699452	0.792643	2.70203e-63	PC2	MFAP4	2.01207e-58	Yes
0.730616	0.677192	0.776377	1.24682e-58	PC2	ADAMTS8	9.28441e-54	Yes
0.729406	0.675787	0.775346	2.38369e-58	PC2	SCN7A	1.77502e-53	Yes
0.713219	0.657028	0.761528	1.00779e-54	PC2	ABI3BP	7.50453e-50	Yes
0.71201	0.65563	0.760494	1.8369e-54	PC2	PGR	1.36785e-49	Yes
0.709971	0.653273	0.75875	5.01976e-54	PC2	CBX7	3.73797e-49	Yes
0.703783	0.646126	0.753453	1.00709e-52	PC2	A2M	7.49928e-48	Yes
0.701027	0.642945	0.751091	3.7355e-52	PC2	NFIX	2.78164e-47	Yes
0.700339	0.642152	0.750502	5.16789e-52	PC2	GFRA1	3.84827e-47	Yes
0.697212	0.638547	0.747821	2.23597e-51	PC2	C7	1.66502e-46	Yes
0.696426	0.637642	0.747147	3.22138e-51	PC2	MS4A2	2.3988e-46	Yes
0.695189	0.636216	0.746085	5.71099e-51	PC2	ITGA8	4.25269e-46	Yes
0.688566	0.628593	0.740399	1.16525e-49	PC2	FAT4	8.67706e-45	Yes
0.68729	0.627125	0.739303	2.06395e-49	PC2	SYNE1	1.53692e-44	Yes
0.685367	0.624914	0.73765	4.85878e-49	PC2	TNXB	3.61809e-44	Yes
0.684927	0.624409	0.737271	5.90499e-49	PC2	SLIT3	4.39715e-44	Yes
0.68305	0.622252	0.735657	1.3513e-48	PC2	SCN4B	1.00625e-43	Yes
0.682595	0.62173	0.735266	1.64964e-48	PC2	CHRDL1	1.2284e-43	Yes
0.679628	0.618322	0.732713	6.01571e-48	PC2	TCF21	4.4796e-43	Yes
0.676288	0.61449	0.729838	2.53338e-47	PC2	ADH1B	1.88648e-42	Yes
0.675332	0.613393	0.729014	3.81104e-47	PC2	CACNA1C	2.83789e-42	Yes
0.674398	0.612323	0.72821	5.66795e-47	PC2	ABCA8	4.22064e-42	Yes
0.673958	0.611818	0.72783	6.83212e-47	PC2	INMT	5.08754e-42	Yes
0.673874	0.611722	0.727758	7.07861e-47	PC2	LAMA2	5.27109e-42	Yes
0.669908	0.607178	0.72434	3.74991e-46	PC2	MYH11	2.79237e-41	Yes
0.668808	0.605918	0.723391	5.92703e-46	PC2	ATP1A2	4.41357e-41	Yes
0.664895	0.601439	0.720014	2.9745e-45	PC2	HMCN1	2.21496e-40	Yes
0.664755	0.601279	0.719893	3.14963e-45	PC2	RAI2	2.34537e-40	Yes
0.662633	0.598852	0.718061	7.47344e-45	PC2	SHROOM4	5.5651e-40	Yes
0.662397	0.598582	0.717858	8.22219e-45	PC2	AOC3	6.12265e-40	Yes
0.661493	0.597548	0.717077	1.18535e-44	PC2	LTBP2	8.8267e-40	Yes
0.659996	0.595837	0.715783	2.16557e-44	PC2	ARHGAP31	1.61259e-39	Yes
0.656835	0.592226	0.713051	7.64453e-44	PC2	C1orf186	5.6925e-39	Yes
0.655882	0.591139	0.712228	1.11438e-43	PC2	MYOCD	8.29824e-39	Yes
0.653866	0.588837	0.710484	2.46484e-43	PC2	ABCA6	1.83544e-38	Yes
0.653273	0.588161	0.709971	3.10918e-43	PC2	GAS7	2.31525e-38	Yes
0.652285	0.587033	0.709116	4.57376e-43	PC2	ITIH5	3.40585e-38	Yes
0.651421	0.586048	0.708369	6.4005e-43	PC2	ROBO2	4.76613e-38	Yes
0.648843	0.583109	0.706137	1.73427e-42	PC2	ABCA9	1.29143e-37	Yes
0.646475	0.58041	0.704086	4.29605e-42	PC2	PKNOX2	3.19905e-37	Yes
0.644622	0.578299	0.70248	8.68819e-42	PC2	MAPK10	6.46966e-37	Yes
0.643186	0.576665	0.701236	1.49423e-41	PC2	TNS1	1.11268e-36	Yes
0.64312	0.576589	0.701178	1.53225e-41	PC2	RSPO1	1.14099e-36	Yes
0.643043	0.576501	0.701111	1.57729e-41	PC2	FHL1	1.17453e-36	Yes
0.641162	0.57436	0.69948	3.1949e-41	PC2	MAMDC2	2.37909e-36	Yes
0.639229	0.572162	0.697804	6.56234e-41	PC2	GPRASP1	4.88665e-36	Yes
0.638058	0.57083	0.696788	1.01265e-40	PC2	COL6A6	7.5407e-36	Yes
0.637434	0.570121	0.696246	1.27502e-40	PC2	ELN	9.4944e-36	Yes
0.636928	0.569546	0.695807	1.53619e-40	PC2	PODN	1.14392e-35	Yes
0.636913	0.569529	0.695794	1.54482e-40	PC2	C18orf1	1.15035e-35	Yes
0.635437	0.56785	0.694512	2.65606e-40	PC2	SCN2B	1.97784e-35	Yes
0.634887	0.567226	0.694035	3.247e-40	PC2	CASS4	2.41788e-35	Yes
0.634452	0.566732	0.693657	3.806e-40	PC2	ANKRD44	2.83414e-35	Yes
0.634427	0.566703	0.693636	3.84083e-40	PC2	GSTM5	2.86007e-35	Yes
0.63384	0.566036	0.693126	4.75657e-40	PC2	HLF	3.54198e-35	Yes
0.633678	0.565852	0.692985	5.04574e-40	PC2	C2orf40	3.75731e-35	Yes
0.631125	0.562953	0.690767	1.27131e-39	PC2	FMO2	9.46678e-35	Yes
0.631002	0.562813	0.69066	1.32896e-39	PC2	COLEC12	9.89611e-35	Yes
0.630642	0.562405	0.690348	1.51256e-39	PC2	LSAMP	1.12633e-34	Yes
0.630091	0.561779	0.689869	1.8439e-39	PC2	CDH23	1.37306e-34	Yes
0.629942	0.56161	0.689739	1.94535e-39	PC2	COL29A1	1.4486e-34	Yes
0.629931	0.561598	0.68973	1.95291e-39	PC2	SVEP1	1.45423e-34	Yes
0.629851	0.561506	0.68966	2.01013e-39	PC2	TBX5	1.49685e-34	Yes
0.629803	0.561452	0.689618	2.04494e-39	PC2	TBX4	1.52276e-34	Yes
0.627859	0.559246	0.687928	4.09591e-39	PC2	CCR6	3.05002e-34	Yes
0.626623	0.557844	0.686853	6.35301e-39	PC2	PCDP1	4.73077e-34	Yes
0.624355	0.555273	0.684881	1.41441e-38	PC2	RASSF2	1.05324e-33	Yes
0.623842	0.554692	0.684434	1.69363e-38	PC2	HDC	1.26116e-33	Yes
0.62347	0.55427	0.68411	1.93006e-38	PC2	SPN	1.43722e-33	Yes
0.622697	0.553394	0.683438	2.52921e-38	PC2	CGNL1	1.88338e-33	Yes
0.622086	0.552702	0.682906	3.1303e-38	PC2	BTNL9	2.33098e-33	Yes
0.621308	0.55182	0.682228	4.10426e-38	PC2	DLEC1	3.05623e-33	Yes
0.620258	0.550631	0.681314	5.90909e-38	PC2	RASGRP2	4.4002e-33	Yes
0.619189	0.549421	0.680383	8.54927e-38	PC2	CD22	6.36621e-33	Yes
0.619	0.549207	0.680219	9.12561e-38	PC2	ZNF366	6.79539e-33	Yes
0.617056	0.547005	0.678524	1.78006e-37	PC2	DLC1	1.32552e-32	Yes
0.616817	0.546735	0.678316	1.93174e-37	PC2	GNG7	1.43847e-32	Yes
0.616747	0.546656	0.678255	1.97844e-37	PC2	GHR	1.47324e-32	Yes
0.615407	0.545141	0.677088	3.12468e-37	PC2	ATP13A4	2.32679e-32	Yes
0.615146	0.544845	0.67686	3.41512e-37	PC2	SPARCL1	2.54307e-32	Yes
0.614991	0.544669	0.676725	3.6002e-37	PC2	ADRB2	2.68089e-32	Yes
0.61437	0.543967	0.676183	4.44535e-37	PC2	FXYD1	3.31023e-32	Yes
0.613506	0.54299	0.67543	5.95599e-37	PC2	ADAMTSL2	4.43513e-32	Yes
0.61297	0.542384	0.674963	7.13685e-37	PC2	NAPSB	5.31445e-32	Yes
0.612429	0.541773	0.674491	8.56363e-37	PC2	PREX2	6.37691e-32	Yes
0.610565	0.539665	0.672865	1.60132e-36	PC2	CD40LG	1.19242e-31	Yes
0.610379	0.539455	0.672702	1.70422e-36	PC2	CX3CR1	1.26905e-31	Yes
0.609919	0.538936	0.672301	1.98698e-36	PC2	FAM38B	1.4796e-31	Yes
0.608974	0.537868	0.671476	2.7226e-36	PC2	MEOX2	2.02738e-31	Yes
0.608629	0.537478	0.671175	3.05328e-36	PC2	ARHGAP6	2.27362e-31	Yes
0.607834	0.53658	0.670481	3.97496e-36	PC2	CORO2B	2.95995e-31	Yes
0.607749	0.536485	0.670407	4.0877e-36	PC2	NLRP1	3.04391e-31	Yes
0.607741	0.536475	0.6704	4.09921e-36	PC2	ITGA9	3.05248e-31	Yes
0.607123	0.535778	0.669861	5.02852e-36	PC2	LPPR4	3.74449e-31	Yes
0.602754	0.530847	0.666044	2.10725e-35	PC2	GPR116	1.56917e-30	Yes
0.602494	0.530554	0.665817	2.29282e-35	PC2	SORBS1	1.70735e-30	Yes
0.602152	0.530168	0.665518	2.56281e-35	PC2	GAB3	1.9084e-30	Yes
0.601823	0.529797	0.665231	2.85127e-35	PC2	MGP	2.1232e-30	Yes
0.600777	0.528617	0.664316	4.00045e-35	PC2	LRRN3	2.97894e-30	Yes
0.600032	0.527777	0.663665	5.08756e-35	PC2	SGCA	3.78845e-30	Yes
0.59983	0.52755	0.663489	5.42945e-35	PC2	RSPO2	4.04304e-30	Yes
0.598939	0.526545	0.662709	7.23142e-35	PC2	RASGRP4	5.38488e-30	Yes
0.598452	0.525997	0.662283	8.45387e-35	PC2	KIAA0748	6.29518e-30	Yes
0.598019	0.525508	0.661904	9.71254e-35	PC2	SPATA18	7.23244e-30	Yes
0.597967	0.52545	0.661859	9.87495e-35	PC2	LMOD1	7.35338e-30	Yes
0.597629	0.525068	0.661563	1.1004e-34	PC2	PTPN13	8.1941e-30	Yes
0.597588	0.525023	0.661527	1.11476e-34	PC2	GRIA1	8.30106e-30	Yes
0.596969	0.524326	0.660986	1.35813e-34	PC2	PRG4	1.01133e-29	Yes
0.596826	0.524164	0.660861	1.42179e-34	PC2	IL16	1.05874e-29	Yes
0.596546	0.523849	0.660616	1.55404e-34	PC2	CD300LG	1.15721e-29	Yes
0.596167	0.523422	0.660284	1.75328e-34	PC2	SYNPO	1.30558e-29	Yes
0.594573	0.521627	0.658889	2.9067e-34	PC2	PHACTR1	2.16448e-29	Yes
0.594348	0.521373	0.658692	3.12122e-34	PC2	FGF14	2.32422e-29	Yes
0.593622	0.520556	0.658057	3.92468e-34	PC2	FLI1	2.92251e-29	Yes
0.593127	0.519999	0.657623	4.58621e-34	PC2	MEGF6	3.41512e-29	Yes
0.592359	0.519135	0.656951	5.83766e-34	PC2	CD1E	4.34702e-29	Yes
0.592042	0.518778	0.656674	6.4474e-34	PC2	PTGDS	4.80106e-29	Yes
0.591399	0.518054	0.65611	7.88606e-34	PC2	C14orf139	5.87235e-29	Yes
0.591367	0.518019	0.656083	7.96373e-34	PC2	HLA_DOA	5.93019e-29	Yes
0.591324	0.517971	0.656045	8.0715e-34	PC2	CBFA2T3	6.01044e-29	Yes
0.59116	0.517786	0.655901	8.49613e-34	PC2	ARHGEF6	6.32664e-29	Yes
0.590969	0.51757	0.655733	9.02047e-34	PC2	LRRK2	6.71709e-29	Yes
0.590892	0.517483	0.655666	9.24049e-34	PC2	SYNPO2	6.88093e-29	Yes
0.590335	0.516857	0.655178	1.09932e-33	PC2	CPA3	8.18607e-29	Yes
0.589986	0.516465	0.654872	1.22545e-33	PC2	ADAMTS17	9.12528e-29	Yes
0.588896	0.515239	0.653918	1.71898e-33	PC2	C6orf97	1.28004e-28	Yes
0.588754	0.51508	0.653793	1.7963e-33	PC2	FIGF	1.33761e-28	Yes
0.588718	0.515039	0.653761	1.81667e-33	PC2	SUSD2	1.35279e-28	Yes
0.588476	0.514767	0.653549	1.95798e-33	PC2	KIAA1529	1.45801e-28	Yes
0.588092	0.514335	0.653213	2.20468e-33	PC2	SLIT2	1.64171e-28	Yes
0.587954	0.51418	0.653092	2.30082e-33	PC2	CYP4B1	1.7133e-28	Yes
0.587777	0.513981	0.652937	2.43004e-33	PC2	FGD5	1.80953e-28	Yes
0.587311	0.513457	0.652528	2.80638e-33	PC2	GAPT	2.08977e-28	Yes
0.587202	0.513335	0.652433	2.90156e-33	PC2	OGN	2.16065e-28	Yes
0.58701	0.513119	0.652264	3.07875e-33	PC2	CIITA	2.29259e-28	Yes
0.586209	0.512218	0.651562	3.93927e-33	PC2	COL14A1	2.93338e-28	Yes
0.585391	0.511299	0.650845	5.06207e-33	PC2	TPSAB1	3.76947e-28	Yes
0.585067	0.510935	0.650561	5.58996e-33	PC2	MEF2C	4.16256e-28	Yes
0.584993	0.510852	0.650496	5.71761e-33	PC2	AMICA1	4.25762e-28	Yes
0.584125	0.509877	0.649735	7.45339e-33	PC2	RASSF5	5.55017e-28	Yes
0.582109	0.507613	0.647966	1.37503e-32	PC2	FRY	1.02392e-27	Yes
0.582055	0.507552	0.647918	1.39802e-32	PC2	C4A	1.04104e-27	Yes
0.581917	0.507397	0.647797	1.45767e-32	PC2	NGFR	1.08545e-27	Yes
0.581728	0.507185	0.647632	1.54336e-32	PC2	SLC18A2	1.14926e-27	Yes
0.580993	0.50636	0.646987	1.92694e-32	PC2	JPH4	1.4349e-27	Yes
0.580444	0.505744	0.646505	2.27352e-32	PC2	PRDM6	1.69298e-27	Yes
0.580127	0.505388	0.646226	2.50115e-32	PC2	CAPN3	1.86248e-27	Yes
0.579526	0.504714	0.645699	2.99601e-32	PC2	TLE4	2.23098e-27	Yes
0.578987	0.504108	0.645225	3.52193e-32	PC2	KCNA3	2.6226e-27	Yes
0.578867	0.503975	0.645121	3.64993e-32	PC2	AKAP13	2.71792e-27	Yes
0.578558	0.503627	0.644849	4.00456e-32	PC2	RIC3	2.982e-27	Yes
0.578387	0.503435	0.644699	4.2146e-32	PC2	TMEM119	3.1384e-27	Yes
0.578196	0.503221	0.644531	4.46165e-32	PC2	MAN1C1	3.32237e-27	Yes
0.57769	0.502654	0.644087	5.1885e-32	PC2	SNX30	3.86361e-27	Yes
0.577548	0.502494	0.643962	5.41382e-32	PC2	METTL7A	4.0314e-27	Yes
0.577339	0.502261	0.643779	5.76067e-32	PC2	PLEKHH2	4.28969e-27	Yes
0.576796	0.501651	0.643301	6.77251e-32	PC2	DPEP2	5.04315e-27	Yes
0.575583	0.500291	0.642236	9.70441e-32	PC2	PLD4	7.22639e-27	Yes
0.575434	0.500124	0.642105	1.01421e-31	PC2	WBSCR17	7.55233e-27	Yes
0.574928	0.499556	0.64166	1.17807e-31	PC2	NFASC	8.77253e-27	Yes
0.574631	0.499224	0.641399	1.28598e-31	PC2	44808	9.57608e-27	Yes
0.573129	0.49754	0.640079	2.00117e-31	PC2	RASGRF1	1.49017e-26	Yes
0.572211	0.496511	0.639272	2.61919e-31	PC2	PTPRT	1.95038e-26	Yes
0.572066	0.496349	0.639144	2.73274e-31	PC2	SYT15	2.03493e-26	Yes
0.571951	0.496221	0.639044	2.82583e-31	PC2	TLR2	2.10426e-26	Yes
0.571846	0.496103	0.638952	2.91368e-31	PC2	SSC5D	2.16967e-26	Yes
0.571684	0.495921	0.638808	3.0556e-31	PC2	RORA	2.27535e-26	Yes
0.571612	0.49584	0.638745	3.12057e-31	PC2	FAM107A	2.32373e-26	Yes
0.571159	0.495333	0.638347	3.56159e-31	PC2	PIK3IP1	2.65214e-26	Yes
0.571107	0.495275	0.638302	3.61556e-31	PC2	PCDHGB7	2.69233e-26	Yes
0.57035	0.494428	0.637636	4.50716e-31	PC2	NR3C2	3.35625e-26	Yes
0.570249	0.494315	0.637547	4.64124e-31	PC2	TRANK1	3.4561e-26	Yes
0.570094	0.494141	0.63741	4.85563e-31	PC2	SMARCA2	3.61575e-26	Yes
0.570058	0.494101	0.637379	4.90641e-31	PC2	RYR2	3.65356e-26	Yes
0.569632	0.493623	0.637004	5.55267e-31	PC2	PTGER4	4.13479e-26	Yes
0.569407	0.493371	0.636806	5.92766e-31	PC2	MEOX1	4.41403e-26	Yes
0.569294	0.493245	0.636707	6.12372e-31	PC2	NHSL2	4.56003e-26	Yes
0.568664	0.49254	0.636153	7.34916e-31	PC2	FGFR2	5.47255e-26	Yes
0.568611	0.49248	0.636106	7.46306e-31	PC2	RTN4RL1	5.55737e-26	Yes
0.568224	0.492047	0.635766	8.34559e-31	PC2	C13orf30	6.21454e-26	Yes
0.567503	0.491241	0.635131	1.02736e-30	PC2	DOCK10	7.65024e-26	Yes
0.567139	0.490833	0.63481	1.14104e-30	PC2	KCNJ5	8.49674e-26	Yes
0.567111	0.490801	0.634786	1.15024e-30	PC2	F11	8.56529e-26	Yes
0.566771	0.490421	0.634487	1.2682e-30	PC2	TAL1	9.44362e-26	Yes
0.566106	0.489677	0.633901	1.53505e-30	PC2	CD1C	1.14307e-25	Yes
0.565635	0.48915	0.633487	1.75671e-30	PC2	CD37	1.30813e-25	Yes
0.565354	0.488836	0.633239	1.90378e-30	PC2	TPSB2	1.41765e-25	Yes
0.565091	0.488542	0.633008	2.05244e-30	PC2	HPGDS	1.52835e-25	Yes
0.56476	0.488171	0.632716	2.25593e-30	PC2	SNED1	1.67988e-25	Yes
0.564504	0.487885	0.632491	2.42648e-30	PC2	FOXF2	1.80688e-25	Yes
0.564432	0.487805	0.632428	2.47657e-30	PC2	TMPRSS2	1.84418e-25	Yes
0.564251	0.487602	0.632268	2.60825e-30	PC2	PDZD4	1.94223e-25	Yes
0.564183	0.487526	0.632208	2.6592e-30	PC2	ZNF423	1.98018e-25	Yes
0.56324	0.486472	0.631378	3.47675e-30	PC2	DPYSL2	2.58896e-25	Yes
0.562837	0.486022	0.631023	3.89713e-30	PC2	ZCCHC24	2.902e-25	Yes
0.562809	0.48599	0.630998	3.92837e-30	PC2	OLFML1	2.92526e-25	Yes
0.562691	0.485858	0.630895	4.06199e-30	PC2	PRICKLE2	3.02476e-25	Yes
0.562685	0.485851	0.630889	4.06982e-30	PC2	PNMAL2	3.03059e-25	Yes
0.56261	0.485768	0.630823	4.1562e-30	PC2	SCARF1	3.09492e-25	Yes
0.562601	0.485757	0.630815	4.1677e-30	PC2	PIGR	3.10348e-25	Yes
0.562291	0.485411	0.630542	4.54947e-30	PC2	ROS1	3.38776e-25	Yes
0.561895	0.484968	0.630193	5.0886e-30	PC2	PRELP	3.78922e-25	Yes
0.561735	0.484789	0.630052	5.3241e-30	PC2	CA3	3.96459e-25	Yes
0.561533	0.484563	0.629874	5.63711e-30	PC2	GCET2	4.19767e-25	Yes
0.561303	0.484307	0.629671	6.01417e-30	PC2	VWF	4.47845e-25	Yes
0.561006	0.483975	0.62941	6.53956e-30	PC2	CCDC146	4.86968e-25	Yes
0.560859	0.483811	0.629281	6.81485e-30	PC2	PIK3R1	5.07468e-25	Yes
0.56054	0.483455	0.628999	7.45504e-30	PC2	ISLR2	5.5514e-25	Yes
0.56048	0.483387	0.628946	7.58395e-30	PC2	DARC	5.64739e-25	Yes
0.560005	0.482856	0.628527	8.66668e-30	PC2	RUNX1T1	6.45364e-25	Yes
0.559623	0.48243	0.628191	9.64649e-30	PC2	IKZF1	7.18326e-25	Yes
0.559219	0.481978	0.627834	1.08037e-29	PC2	ARHGAP30	8.04501e-25	Yes
0.558868	0.481587	0.627526	1.19161e-29	PC2	LIMS2	8.87334e-25	Yes
0.55828	0.48093	0.627007	1.40445e-29	PC2	DOCK8	1.04582e-24	Yes
0.55824	0.480885	0.626972	1.42042e-29	PC2	CASQ2	1.05772e-24	Yes
0.558125	0.480756	0.62687	1.46671e-29	PC2	CTSG	1.09218e-24	Yes
0.557997	0.480614	0.626757	1.51996e-29	PC2	LOC283174	1.13184e-24	Yes
0.557335	0.479875	0.626174	1.82755e-29	PC2	KLHL6	1.36088e-24	Yes
0.557245	0.479773	0.626094	1.87437e-29	PC2	SGK269	1.39575e-24	Yes
0.556941	0.479434	0.625826	2.03955e-29	PC2	C15orf59	1.51875e-24	Yes
0.556781	0.479256	0.625685	2.13222e-29	PC2	ERBB4	1.58776e-24	Yes
0.556635	0.479092	0.625556	2.22051e-29	PC2	KIAA0408	1.6535e-24	Yes
0.556189	0.478595	0.625163	2.51248e-29	PC2	MACF1	1.87092e-24	Yes
0.555748	0.478103	0.624774	2.83906e-29	PC2	ZEB2	2.11411e-24	Yes
0.55511	0.477391	0.624212	3.38647e-29	PC2	ERG	2.52174e-24	Yes
0.554505	0.476716	0.623678	4.00196e-29	PC2	SCTR	2.98006e-24	Yes
0.554357	0.476551	0.623547	4.16847e-29	PC2	GRID1	3.10405e-24	Yes
0.554327	0.476517	0.623521	4.20301e-29	PC2	DOCK2	3.12977e-24	Yes
0.554075	0.476235	0.623298	4.5055e-29	PC2	CCL14	3.35502e-24	Yes
0.55394	0.476085	0.623179	4.67628e-29	PC2	FBLN5	3.48219e-24	Yes
0.553724	0.475844	0.622988	4.96171e-29	PC2	MAP3K3	3.69474e-24	Yes
0.553337	0.475413	0.622647	5.51787e-29	PC2	ARHGEF15	4.10888e-24	Yes
0.553315	0.475388	0.622628	5.5512e-29	PC2	CACNA2D2	4.1337e-24	Yes
0.552274	0.474227	0.621708	7.38489e-29	PC2	LRP2BP	5.49915e-24	Yes
0.552201	0.474145	0.621644	7.53377e-29	PC2	CELF2	5.61002e-24	Yes
0.551857	0.473761	0.62134	8.27718e-29	PC2	GVIN1	6.1636e-24	Yes
0.550544	0.472298	0.620181	1.18364e-28	PC2	D4S234E	8.814e-24	Yes
0.550404	0.472141	0.620057	1.22976e-28	PC2	OLFM1	9.15737e-24	Yes
0.550374	0.472109	0.620032	1.23955e-28	PC2	C1orf116	9.23033e-24	Yes
0.549967	0.471654	0.619671	1.38478e-28	PC2	SCGB3A1	1.03118e-23	Yes
0.549086	0.470673	0.618894	1.75803e-28	PC2	TMEM130	1.30912e-23	Yes
0.548973	0.470547	0.618794	1.81266e-28	PC2	CADM3	1.3498e-23	Yes
0.548846	0.470405	0.618681	1.87609e-28	PC2	VWA3A	1.39703e-23	Yes
0.548471	0.469988	0.618351	2.07588e-28	PC2	CCDC39	1.5458e-23	Yes
0.547887	0.469337	0.617835	2.43025e-28	PC2	NXPH3	1.80969e-23	Yes
0.546164	0.467417	0.616312	3.86204e-28	PC2	TGFBR3	2.87587e-23	Yes
0.545956	0.467185	0.616128	4.08333e-28	PC2	DUOX1	3.04065e-23	Yes
0.545586	0.466773	0.615801	4.50798e-28	PC2	ADAMTSL3	3.35687e-23	Yes
0.545574	0.46676	0.61579	4.52296e-28	PC2	SRGAP3	3.36802e-23	Yes
0.545009	0.466131	0.615291	5.25986e-28	PC2	TMEM173	3.91676e-23	Yes
0.54473	0.46582	0.615044	5.66657e-28	PC2	MUSTN1	4.21961e-23	Yes
0.544704	0.465791	0.615021	5.70579e-28	PC2	C10orf72	4.24882e-23	Yes
0.544619	0.465697	0.614946	5.83627e-28	PC2	CPAMD8	4.34598e-23	Yes
0.544318	0.465362	0.61468	6.32352e-28	PC2	SELP	4.70881e-23	Yes
0.543432	0.464375	0.613897	8.00341e-28	PC2	LOC202181	5.95974e-23	Yes
0.543307	0.464236	0.613786	8.27373e-28	PC2	PEG3	6.16104e-23	Yes
0.543182	0.464097	0.613676	8.55214e-28	PC2	FAM65B	6.36835e-23	Yes
0.543111	0.464018	0.613613	8.71564e-28	PC2	EFCAB6	6.4901e-23	Yes
0.542529	0.46337	0.613098	1.01695e-27	PC2	PRKCB	7.57274e-23	Yes
0.542479	0.463314	0.613054	1.0305e-27	PC2	C6	7.67363e-23	Yes
0.542464	0.463298	0.61304	1.03463e-27	PC2	GAS2L2	7.70437e-23	Yes
0.542447	0.463279	0.613025	1.03928e-27	PC2	FOXF1	7.73901e-23	Yes
0.542299	0.463114	0.612895	1.08077e-27	PC2	MAP6	8.04793e-23	Yes
0.542237	0.463045	0.61284	1.09864e-27	PC2	LTBP4	8.18103e-23	Yes
0.54216	0.46296	0.612772	1.1212e-27	PC2	CACHD1	8.34904e-23	Yes
0.542003	0.462784	0.612633	1.16885e-27	PC2	AKNA	8.70382e-23	Yes
0.541888	0.462657	0.612531	1.20478e-27	PC2	GALNTL1	8.97137e-23	Yes
0.541824	0.462585	0.612474	1.22538e-27	PC2	TBX2	9.12483e-23	Yes
0.541356	0.462065	0.612061	1.38641e-27	PC2	FAM13C	1.03239e-22	Yes
0.540969	0.461635	0.611719	1.53509e-27	PC2	TEF	1.14311e-22	Yes
0.540857	0.46151	0.611619	1.58134e-27	PC2	MCC	1.17755e-22	Yes
0.540459	0.461067	0.611267	1.75564e-27	PC2	PPP1R12B	1.30734e-22	Yes
0.540351	0.460947	0.611171	1.80652e-27	PC2	ZNF831	1.34522e-22	Yes
0.540347	0.460943	0.611168	1.80808e-27	PC2	VIPR1	1.34638e-22	Yes
0.539983	0.460538	0.610846	1.98971e-27	PC2	DYNC2H1	1.48164e-22	Yes
0.539501	0.460001	0.610419	2.258e-27	PC2	PIK3R5	1.68142e-22	Yes
0.539271	0.459746	0.610216	2.3977e-27	PC2	JAM2	1.78545e-22	Yes
0.538809	0.459233	0.609807	2.70592e-27	PC2	NWD1	2.01496e-22	Yes
0.538774	0.459194	0.609776	2.73073e-27	PC2	FAM189A2	2.03344e-22	Yes
0.538483	0.45887	0.609519	2.9466e-27	PC2	TEK	2.19418e-22	Yes
0.538371	0.458745	0.609419	3.03436e-27	PC2	CRY2	2.25953e-22	Yes
0.538365	0.458738	0.609413	3.03938e-27	PC2	TENC1	2.26327e-22	Yes
0.538166	0.458517	0.609237	3.20135e-27	PC2	DES	2.38389e-22	Yes
0.538099	0.458443	0.609179	3.25712e-27	PC2	UTRN	2.42541e-22	Yes
0.53779	0.458099	0.608905	3.53088e-27	PC2	SULT1C4	2.62927e-22	Yes
0.537624	0.457915	0.608758	3.68685e-27	PC2	C14orf132	2.74542e-22	Yes
0.536909	0.45712	0.608125	4.44026e-27	PC2	GFRA2	3.30644e-22	Yes
0.536584	0.456758	0.607837	4.8319e-27	PC2	TCF4	3.59807e-22	Yes
0.536068	0.456186	0.607381	5.52252e-27	PC2	NTRK2	4.11234e-22	Yes
0.535909	0.456009	0.607239	5.7553e-27	PC2	LTC4S	4.28568e-22	Yes
0.535704	0.455781	0.607058	6.06852e-27	PC2	IGSF9B	4.51892e-22	Yes
0.535674	0.455747	0.607031	6.11678e-27	PC2	SFTPC	4.55486e-22	Yes
0.535607	0.455673	0.606971	6.22411e-27	PC2	EPB41L4A	4.63478e-22	Yes
0.535542	0.455601	0.606914	6.32879e-27	PC2	FAIM3	4.71273e-22	Yes
0.535507	0.455562	0.606883	6.3865e-27	PC2	DNAH9	4.75571e-22	Yes
0.535092	0.455101	0.606516	7.10884e-27	PC2	PRICKLE1	5.2936e-22	Yes
0.53473	0.454699	0.606196	7.80472e-27	PC2	GPIHBP1	5.81179e-22	Yes
0.53466	0.454621	0.606133	7.94813e-27	PC2	NRIP2	5.91857e-22	Yes
0.534641	0.4546	0.606117	7.98602e-27	PC2	ATP1B2	5.94679e-22	Yes
0.534512	0.454457	0.606002	8.25597e-27	PC2	SCN1A	6.1478e-22	Yes
0.534091	0.453989	0.605629	9.2017e-27	PC2	HLA_DPB1	6.85204e-22	Yes
0.533789	0.453654	0.605362	9.94507e-27	PC2	BOC	7.40559e-22	Yes
0.533265	0.453071	0.604897	1.138e-26	PC2	LRRC36	8.47414e-22	Yes
0.533151	0.452945	0.604796	1.17181e-26	PC2	LEFTY2	8.72589e-22	Yes
0.533108	0.452897	0.604758	1.18469e-26	PC2	C20orf194	8.82182e-22	Yes
0.533085	0.452871	0.604737	1.19187e-26	PC2	GDF10	8.87525e-22	Yes
0.532933	0.452703	0.604603	1.23922e-26	PC2	DNAH6	9.22787e-22	Yes
0.53268	0.452422	0.604379	1.322e-26	PC2	TRIM22	9.84425e-22	Yes
0.532544	0.452271	0.604259	1.36888e-26	PC2	FRZB	1.01933e-21	Yes
0.532474	0.452194	0.604197	1.39362e-26	PC2	PTK2B	1.03776e-21	Yes
0.532295	0.451995	0.604038	1.45897e-26	PC2	CCDC141	1.08642e-21	Yes
0.531905	0.451561	0.603692	1.61213e-26	PC2	CCR4	1.20047e-21	Yes
0.53181	0.451456	0.603607	1.65191e-26	PC2	RTN1	1.23009e-21	Yes
0.531656	0.451285	0.603472	1.71783e-26	PC2	ZMAT1	1.27918e-21	Yes
0.53115	0.450723	0.603022	1.9549e-26	PC2	NFATC1	1.45572e-21	Yes
0.531057	0.45062	0.60294	2.00175e-26	PC2	NALCN	1.4906e-21	Yes
0.530746	0.450275	0.602665	2.1663e-26	PC2	KAL1	1.61313e-21	Yes
0.530626	0.450141	0.602558	2.2339e-26	PC2	P2RY12	1.66347e-21	Yes
0.5305	0.450002	0.602447	2.30634e-26	PC2	FGD2	1.71742e-21	Yes
0.530231	0.449703	0.602208	2.47001e-26	PC2	PARP15	1.83929e-21	Yes
0.530146	0.449609	0.602133	2.52344e-26	PC2	RGS22	1.87908e-21	Yes
0.529988	0.449434	0.601993	2.62681e-26	PC2	LOC149620	1.95605e-21	Yes
0.529768	0.44919	0.601798	2.77775e-26	PC2	RGS9	2.06845e-21	Yes
0.529613	0.449018	0.60166	2.88903e-26	PC2	PTPRD	2.15131e-21	Yes
0.529598	0.449001	0.601647	2.90032e-26	PC2	SLC27A1	2.15972e-21	Yes
0.529444	0.44883	0.60151	3.01583e-26	PC2	ARHGEF17	2.24574e-21	Yes
0.52942	0.448803	0.601489	3.03431e-26	PC2	PTGIR	2.2595e-21	Yes
0.528996	0.448333	0.601113	3.37803e-26	PC2	ZNF608	2.51545e-21	Yes
0.528581	0.447872	0.600745	3.752e-26	PC2	SGCD	2.79393e-21	Yes
0.528034	0.447266	0.60026	4.30735e-26	PC2	DTHD1	3.20747e-21	Yes
0.527272	0.44642	0.599584	5.2194e-26	PC2	AFF3	3.88663e-21	Yes
0.527197	0.446338	0.599517	5.31832e-26	PC2	NCAM2	3.96029e-21	Yes
0.52702	0.446141	0.59936	5.56083e-26	PC2	CYBRD1	4.14087e-21	Yes
0.526731	0.445821	0.599104	5.97912e-26	PC2	TMEM232	4.45235e-21	Yes
0.526685	0.445769	0.599063	6.0495e-26	PC2	LOC401093	4.50476e-21	Yes
0.526616	0.445694	0.599002	6.154e-26	PC2	SLC34A2	4.58258e-21	Yes
0.525646	0.444617	0.598141	7.84942e-26	PC2	SDK2	5.84507e-21	Yes
0.525536	0.444496	0.598044	8.06713e-26	PC2	ADCY9	6.00718e-21	Yes
0.524823	0.443706	0.597411	9.64088e-26	PC2	FCGBP	7.17908e-21	Yes
0.524806	0.443686	0.597395	9.68319e-26	PC2	ITGAL	7.21059e-21	Yes
0.524775	0.443652	0.597368	9.75825e-26	PC2	IL33	7.26648e-21	Yes
0.524733	0.443606	0.597331	9.85933e-26	PC2	GIMAP8	7.34175e-21	Yes
0.524376	0.44321	0.597014	1.07787e-25	PC2	C3orf15	8.02638e-21	Yes
0.524308	0.443134	0.596953	1.09634e-25	PC2	ADARB1	8.16388e-21	Yes
0.524154	0.442964	0.596817	1.13918e-25	PC2	PER3	8.48287e-21	Yes
0.524149	0.442958	0.596812	1.14063e-25	PC2	ACSS1	8.49369e-21	Yes
0.524142	0.442951	0.596806	1.14248e-25	PC2	PRX	8.50748e-21	Yes
0.523146	0.441847	0.595922	1.46351e-25	PC2	C7orf58	1.08981e-20	Yes
0.523116	0.441814	0.595896	1.47437e-25	PC2	PRAM1	1.09789e-20	Yes
0.52284	0.441508	0.59565	1.57897e-25	PC2	TGFBR2	1.17578e-20	Yes
0.522788	0.44145	0.595604	1.59964e-25	PC2	FCER1A	1.19117e-20	Yes
0.522734	0.441391	0.595556	1.62091e-25	PC2	ZNF540	1.20701e-20	Yes
0.522425	0.441048	0.595282	1.75001e-25	PC2	BZRAP1	1.30315e-20	Yes
0.522367	0.440983	0.59523	1.77545e-25	PC2	CLIC5	1.32209e-20	Yes
0.522357	0.440973	0.595222	1.7795e-25	PC2	MAOB	1.32511e-20	Yes
0.522256	0.440861	0.595132	1.82473e-25	PC2	TXNIP	1.35879e-20	Yes
0.52211	0.440699	0.595002	1.892e-25	PC2	PRICKLE4	1.40888e-20	Yes
0.521807	0.440363	0.594733	2.03926e-25	PC2	LRP1	1.51853e-20	Yes
0.52143	0.439946	0.594398	2.23778e-25	PC2	GGTLC1	1.66636e-20	Yes
0.521175	0.439663	0.594171	2.38344e-25	PC2	NDRG2	1.77483e-20	Yes
0.520837	0.43929	0.593872	2.59003e-25	PC2	DPCR1	1.92867e-20	Yes
0.520789	0.439236	0.593829	2.62123e-25	PC2	ZNF154	1.9519e-20	Yes
0.52056	0.438983	0.593626	2.77288e-25	PC2	C17orf103	2.06483e-20	Yes
0.520231	0.438618	0.593333	3.00702e-25	PC2	C16orf89	2.23918e-20	Yes
0.519954	0.438311	0.593087	3.21872e-25	PC2	TLR5	2.39682e-20	Yes
0.519905	0.438257	0.593043	3.25784e-25	PC2	ABCA3	2.42595e-20	Yes
0.518808	0.437043	0.592069	4.26242e-25	PC2	ARHGAP24	3.17401e-20	Yes
0.518457	0.436654	0.591757	4.64472e-25	PC2	TLR7	3.45869e-20	Yes
0.518096	0.436254	0.591436	5.07307e-25	PC2	C16orf54	3.77766e-20	Yes
0.518053	0.436207	0.591397	5.12663e-25	PC2	PTH1R	3.81755e-20	Yes
0.517587	0.435691	0.590984	5.74295e-25	PC2	TUB	4.27649e-20	Yes
0.517418	0.435504	0.590833	5.98523e-25	PC2	ARHGAP20	4.4569e-20	Yes
0.517186	0.435247	0.590627	6.33302e-25	PC2	CD4	4.71589e-20	Yes
0.516457	0.434441	0.589979	7.5597e-25	PC2	C5orf53	5.62933e-20	Yes
0.515928	0.433856	0.589509	8.5951e-25	PC2	FBXL7	6.40034e-20	Yes
0.515546	0.433433	0.589169	9.4281e-25	PC2	C11orf21	7.02064e-20	Yes
0.515303	0.433165	0.588953	9.9979e-25	PC2	IRF8	7.44493e-20	Yes
0.515244	0.433099	0.588901	1.01424e-24	PC2	MACROD2	7.55251e-20	Yes
0.515197	0.433047	0.588859	1.02586e-24	PC2	SNX29	7.63904e-20	Yes
0.515165	0.433012	0.58883	1.03381e-24	PC2	CYP4X1	7.69825e-20	Yes
0.514437	0.432207	0.588183	1.23245e-24	PC2	SH2D3C	9.17747e-20	Yes
0.513907	0.43162	0.587711	1.40049e-24	PC2	AGER	1.04287e-19	Yes
0.513886	0.431597	0.587693	1.40751e-24	PC2	RPL13AP17	1.0481e-19	Yes
0.513803	0.431505	0.587619	1.43599e-24	PC2	PLXNA2	1.06931e-19	Yes
0.513433	0.431096	0.58729	1.56957e-24	PC2	MGAT3	1.16878e-19	Yes
0.513334	0.430987	0.587202	1.6073e-24	PC2	PLCL1	1.19687e-19	Yes
0.512737	0.430327	0.586671	1.85481e-24	PC2	HSPB7	1.38118e-19	Yes
0.512547	0.430116	0.586501	1.94164e-24	PC2	IGSF10	1.44584e-19	Yes
0.512198	0.429731	0.586191	2.11065e-24	PC2	GUCY1A3	1.5717e-19	Yes
0.511742	0.429228	0.585786	2.35367e-24	PC2	VWA2	1.75266e-19	Yes
0.511555	0.42902	0.585619	2.46158e-24	PC2	ZDHHC15	1.83302e-19	Yes
0.511263	0.428698	0.585359	2.63923e-24	PC2	LOC728264	1.9653e-19	Yes
0.511126	0.428546	0.585237	2.7271e-24	PC2	PTCH1	2.03074e-19	Yes
0.510849	0.42824	0.58499	2.91305e-24	PC2	NFATC2	2.1692e-19	Yes
0.510472	0.427824	0.584655	3.18661e-24	PC2	SPON1	2.37291e-19	Yes
0.509889	0.42718	0.584136	3.66064e-24	PC2	NLRP3	2.72589e-19	Yes
0.50987	0.427158	0.584119	3.67746e-24	PC2	PDZD2	2.73842e-19	Yes
0.509852	0.427139	0.584103	3.6932e-24	PC2	FNIP2	2.75014e-19	Yes
0.509823	0.427107	0.584077	3.71819e-24	PC2	THSD1	2.76875e-19	Yes
0.509597	0.426857	0.583875	3.92395e-24	PC2	KCNE1	2.92197e-19	Yes
0.509167	0.426382	0.583493	4.34448e-24	PC2	SPAG8	3.23512e-19	Yes
0.508384	0.425518	0.582796	5.22902e-24	PC2	SEMA5A	3.89379e-19	Yes
0.508044	0.425141	0.582493	5.66736e-24	PC2	BTBD9	4.2202e-19	Yes
0.508023	0.425119	0.582474	5.69511e-24	PC2	TCEAL2	4.24086e-19	Yes
0.508015	0.42511	0.582468	5.70524e-24	PC2	PRDM16	4.2484e-19	Yes
0.507849	0.424927	0.582319	5.93364e-24	PC2	HHIP	4.41849e-19	Yes
0.507795	0.424866	0.582271	6.01051e-24	PC2	AUTS2	4.47573e-19	Yes
0.507	0.423989	0.581563	7.248e-24	PC2	RSPO4	5.39722e-19	Yes
0.506928	0.42391	0.581499	7.37137e-24	PC2	BLK	5.48909e-19	Yes
0.506724	0.423684	0.581317	7.73481e-24	PC2	KIAA2022	5.75973e-19	Yes
0.506572	0.423517	0.581182	8.01515e-24	PC2	TPPP	5.96848e-19	Yes
0.506328	0.423248	0.580965	8.48722e-24	PC2	N4BP2L1	6.32001e-19	Yes
0.5063	0.423216	0.58094	8.54436e-24	PC2	CCDC48	6.36256e-19	Yes
0.506155	0.423057	0.580811	8.83919e-24	PC2	MAML2	6.5821e-19	Yes
0.505789	0.422653	0.580485	9.63139e-24	PC2	ACOXL	7.17202e-19	Yes
0.505648	0.422496	0.580358	9.95654e-24	PC2	PIK3R6	7.41414e-19	Yes
0.505421	0.422246	0.580156	1.04999e-23	PC2	RHOJ	7.81878e-19	Yes
0.505367	0.422186	0.580108	1.06333e-23	PC2	TSPAN32	7.91806e-19	Yes
0.50534	0.422157	0.580085	1.06993e-23	PC2	CD83	7.96723e-19	Yes
0.505019	0.421803	0.579798	1.15348e-23	PC2	SLCO2B1	8.5894e-19	Yes
0.504726	0.421479	0.579537	1.23523e-23	PC2	RCSD1	9.19814e-19	Yes
0.504647	0.421392	0.579467	1.25811e-23	PC2	KIAA1274	9.36851e-19	Yes
0.504555	0.421291	0.579385	1.28546e-23	PC2	ARHGAP25	9.57221e-19	Yes
0.504197	0.420895	0.579066	1.39756e-23	PC2	C1orf173	1.04069e-18	Yes
0.503932	0.420603	0.578829	1.48658e-23	PC2	CD74	1.10698e-18	Yes
0.503919	0.420589	0.578818	1.49088e-23	PC2	COL21A1	1.11019e-18	Yes
0.503343	0.419954	0.578305	1.70477e-23	PC2	KIAA0247	1.26946e-18	Yes
0.503301	0.419907	0.578267	1.72159e-23	PC2	ICAM5	1.28198e-18	Yes
0.503213	0.41981	0.578189	1.75713e-23	PC2	DMBT1	1.30845e-18	Yes
0.502817	0.419373	0.577835	1.92668e-23	PC2	WDR63	1.4347e-18	Yes
0.50281	0.419365	0.577829	1.92981e-23	PC2	WDR65	1.43703e-18	Yes
0.502712	0.419258	0.577742	1.97396e-23	PC2	PIK3CG	1.46991e-18	Yes
0.502469	0.41899	0.577526	2.08834e-23	PC2	FAM184A	1.55508e-18	Yes
0.502281	0.418782	0.577358	2.18151e-23	PC2	CACNB1	1.62446e-18	Yes
0.50219	0.418681	0.577276	2.22819e-23	PC2	PAPLN	1.65922e-18	Yes
0.502134	0.41862	0.577227	2.25698e-23	PC2	CCDC69	1.68066e-18	Yes
0.502005	0.418478	0.577112	2.32532e-23	PC2	MPEG1	1.73155e-18	Yes
0.501659	0.418097	0.576804	2.51898e-23	PC2	RAPGEF5	1.87576e-18	Yes
0.501255	0.417651	0.576443	2.76578e-23	PC2	FAM198A	2.05954e-18	Yes
0.500858	0.417213	0.576089	3.03121e-23	PC2	C1orf87	2.25719e-18	Yes
0.500803	0.417152	0.57604	3.06995e-23	PC2	CALCOCO1	2.28604e-18	Yes
0.500255	0.416548	0.575551	3.48279e-23	PC2	REM1	2.59346e-18	Yes
0.50005	0.416322	0.575368	3.65121e-23	PC2	DUOXA1	2.71887e-18	Yes
0.500024	0.416294	0.575345	3.67275e-23	PC2	C5orf41	2.73491e-18	Yes
0.499789	0.416035	0.575135	3.87665e-23	PC2	C1orf92	2.88674e-18	Yes
0.498995	0.41516	0.574427	4.6513e-23	PC2	MRVI1	3.46359e-18	Yes
0.498879	0.415031	0.574323	4.77729e-23	PC2	ZNF763	3.55741e-18	Yes
0.498794	0.414938	0.574248	4.87069e-23	PC2	DNAI2	3.62696e-18	Yes
0.498787	0.414931	0.574242	4.87821e-23	PC2	SCGB1A1	3.63256e-18	Yes
0.498768	0.414909	0.574224	4.90036e-23	PC2	FAM95B1	3.64905e-18	Yes
0.498668	0.4148	0.574136	5.01297e-23	PC2	PARVG	3.73291e-18	Yes
0.498556	0.414676	0.574035	5.14371e-23	PC2	CYSLTR1	3.83027e-18	Yes
0.498505	0.41462	0.57399	5.20363e-23	PC2	COL13A1	3.87488e-18	Yes
0.498441	0.414549	0.573933	5.28054e-23	PC2	ISM1	3.93215e-18	Yes
0.498415	0.41452	0.57391	5.3122e-23	PC2	TNFRSF13B	3.95573e-18	Yes
0.497923	0.413978	0.57347	5.94481e-23	PC2	DNAH7	4.4268e-18	Yes
0.497893	0.413945	0.573444	5.98512e-23	PC2	ADRA2A	4.45682e-18	Yes
0.497575	0.413594	0.573159	6.43677e-23	PC2	ZEB1	4.79314e-18	Yes
0.497229	0.413214	0.572852	6.96369e-23	PC2	BTK	5.18552e-18	Yes
0.49712	0.413093	0.572754	7.13952e-23	PC2	FLJ42875	5.31644e-18	Yes
0.496786	0.412726	0.572456	7.70303e-23	PC2	PPP1R16B	5.73606e-18	Yes
0.496537	0.412451	0.572233	8.153e-23	PC2	RGL1	6.07113e-18	Yes
0.496439	0.412343	0.572146	8.33641e-23	PC2	ECM2	6.20771e-18	Yes
0.496249	0.412134	0.571976	8.70472e-23	PC2	RBMS3	6.48197e-18	Yes
0.496122	0.411994	0.571863	8.95833e-23	PC2	COL4A3	6.67082e-18	Yes
0.496053	0.411919	0.571802	9.09898e-23	PC2	DNAH12	6.77555e-18	Yes
0.495932	0.411785	0.571694	9.35302e-23	PC2	P2RY13	6.96473e-18	Yes
0.495513	0.411324	0.57132	1.02847e-22	PC2	CLDN18	7.65848e-18	Yes
0.495407	0.411207	0.571224	1.0536e-22	PC2	HSPG2	7.84563e-18	Yes
0.495118	0.410889	0.570967	1.12478e-22	PC2	GIMAP1	8.3757e-18	Yes
0.495073	0.410839	0.570926	1.13632e-22	PC2	CNR1	8.46159e-18	Yes
0.495018	0.410778	0.570877	1.15062e-22	PC2	MICALCL	8.56812e-18	Yes
0.495008	0.410767	0.570868	1.15317e-22	PC2	PLCG2	8.58708e-18	Yes
0.494918	0.410668	0.570788	1.17687e-22	PC2	NLRC3	8.76357e-18	Yes
0.494466	0.41017	0.570384	1.3035e-22	PC2	PDZRN3	9.70649e-18	Yes
0.494399	0.410097	0.570324	1.32338e-22	PC2	IRX1	9.85455e-18	Yes
0.494279	0.409965	0.570217	1.35961e-22	PC2	FMO3	1.01243e-17	Yes
0.494119	0.409789	0.570075	1.40957e-22	PC2	RFX2	1.04964e-17	Yes
0.493906	0.409554	0.569884	1.47893e-22	PC2	CR1	1.10129e-17	Yes
0.493455	0.409058	0.569481	1.63707e-22	PC2	SLC41A1	1.21905e-17	Yes
0.493423	0.409022	0.569453	1.64905e-22	PC2	DAPK2	1.22797e-17	Yes
0.493369	0.408963	0.569404	1.66916e-22	PC2	GATA6	1.24294e-17	Yes
0.493315	0.408904	0.569356	1.68949e-22	PC2	AGAP11	1.25808e-17	Yes
0.493027	0.408587	0.569099	1.80246e-22	PC2	CDO1	1.3422e-17	Yes
0.492556	0.408069	0.568679	2.00349e-22	PC2	SNX25	1.4919e-17	Yes
0.492493	0.407999	0.568622	2.03208e-22	PC2	INPP5D	1.51319e-17	Yes
0.492398	0.407895	0.568538	2.07568e-22	PC2	HLA_DPA1	1.54566e-17	Yes
0.492347	0.407839	0.568492	2.09963e-22	PC2	KANK2	1.56349e-17	Yes
0.492173	0.407647	0.568336	2.18335e-22	PC2	LDB2	1.62583e-17	Yes
0.491984	0.407439	0.568168	2.2776e-22	PC2	HLA_DQB2	1.69601e-17	Yes
0.491955	0.407407	0.568141	2.29267e-22	PC2	RSPH4A	1.70724e-17	Yes
0.491897	0.407344	0.56809	2.32228e-22	PC2	CYP27A1	1.72929e-17	Yes
0.491752	0.407184	0.56796	2.399e-22	PC2	VASH1	1.78641e-17	Yes
0.491681	0.407105	0.567897	2.43763e-22	PC2	SNX20	1.81518e-17	Yes
0.491522	0.406931	0.567755	2.52585e-22	PC2	LRMP	1.88087e-17	Yes
0.491491	0.406896	0.567727	2.54347e-22	PC2	LHFP	1.89399e-17	Yes
0.491434	0.406834	0.567676	2.57597e-22	PC2	IQGAP2	1.91819e-17	Yes
0.491339	0.406729	0.567591	2.63149e-22	PC2	YSK4	1.95954e-17	Yes
0.491172	0.406545	0.567442	2.73153e-22	PC2	CD5	2.03404e-17	Yes
0.657316	0.592776	0.713468	6.31404e-44	PC3	PRR11	4.70175e-39	Yes
0.626661	0.557888	0.686886	6.26778e-39	PC3	CLSPN	4.6673e-34	Yes
0.621757	0.552329	0.682619	3.51059e-38	PC3	ADAM12	2.61416e-33	Yes
0.619667	0.549962	0.680799	7.24957e-38	PC3	CASC5	5.39839e-33	Yes
0.61739	0.547384	0.678816	1.58732e-37	PC3	BICD1	1.18199e-32	Yes
0.612437	0.541781	0.674498	8.54234e-37	PC3	CD274	6.36106e-32	Yes
0.61067	0.539784	0.672956	1.54598e-36	PC3	ASAM	1.15121e-31	Yes
0.601344	0.529257	0.664812	3.33021e-35	PC3	ODZ3	2.47984e-30	Yes
0.59723	0.52462	0.661215	1.24966e-34	PC3	SLC16A1	9.30557e-30	Yes
0.586943	0.513043	0.652206	3.14304e-33	PC3	ADAMTS12	2.34047e-28	Yes
0.584494	0.510291	0.650058	6.66005e-33	PC3	CKAP2L	4.9594e-28	Yes
0.583469	0.50914	0.649159	9.10085e-33	PC3	INHBA	6.77695e-28	Yes
0.582769	0.508354	0.648545	1.12589e-32	PC3	MKI67	8.38392e-28	Yes
0.580907	0.506263	0.646911	1.97777e-32	PC3	KIAA1524	1.47275e-27	Yes
0.579602	0.504799	0.645766	2.92843e-32	PC3	GPR176	2.18065e-27	Yes
0.578395	0.503445	0.644706	4.20388e-32	PC3	BRIP1	3.13042e-27	Yes
0.575911	0.500659	0.642524	8.80617e-32	PC3	ARNTL2	6.55752e-27	Yes
0.575633	0.500347	0.64228	9.56173e-32	PC3	IL2RA	7.12014e-27	Yes
0.574049	0.498571	0.640888	1.52682e-31	PC3	GPC6	1.13694e-26	Yes
0.5709	0.495043	0.638119	3.84046e-31	PC3	ANLN	2.8598e-26	Yes
0.570806	0.494938	0.638037	3.94672e-31	PC3	BRCA2	2.93893e-26	Yes
0.570793	0.494924	0.638025	3.96195e-31	PC3	CD109	2.95027e-26	Yes
0.569779	0.493788	0.637133	5.32114e-31	PC3	ADAM19	3.96239e-26	Yes
0.569587	0.493573	0.636965	5.62543e-31	PC3	E2F7	4.18898e-26	Yes
0.569038	0.492958	0.636482	6.59594e-31	PC3	GREM1	4.91167e-26	Yes
0.567995	0.491791	0.635564	8.91526e-31	PC3	PDCD1LG2	6.63875e-26	Yes
0.565718	0.489243	0.63356	1.71557e-30	PC3	ASAP1	1.2775e-25	Yes
0.565559	0.489066	0.63342	1.79516e-30	PC3	MXRA5	1.33676e-25	Yes
0.565559	0.489065	0.63342	1.79537e-30	PC3	APCDD1L	1.33692e-25	Yes
0.565487	0.488985	0.633357	1.8326e-30	PC3	RBL1	1.36464e-25	Yes
0.561042	0.484016	0.629442	6.47269e-30	PC3	WISP1	4.81989e-25	Yes
0.560862	0.483814	0.629283	6.80916e-30	PC3	AKAP2	5.07044e-25	Yes
0.560784	0.483727	0.629214	6.96081e-30	PC3	GBP5	5.18337e-25	Yes
0.560277	0.48316	0.628767	8.02792e-30	PC3	GFPT2	5.97799e-25	Yes
0.557595	0.480165	0.626403	1.70016e-29	PC3	FN1	1.26602e-24	Yes
0.556069	0.478461	0.625058	2.59738e-29	PC3	SULF1	1.93414e-24	Yes
0.555703	0.478052	0.624734	2.87479e-29	PC3	CENPE	2.14071e-24	Yes
0.555285	0.477585	0.624365	3.22737e-29	PC3	MAP7D3	2.40326e-24	Yes
0.554636	0.476861	0.623793	3.86064e-29	PC3	GAS2L3	2.87482e-24	Yes
0.55356	0.475661	0.622844	5.19037e-29	PC3	GBP1	3.86501e-24	Yes
0.552721	0.474725	0.622103	6.53373e-29	PC3	RECQL	4.86534e-24	Yes
0.550137	0.471844	0.619822	1.32211e-28	PC3	LIMS1	9.84512e-24	Yes
0.549438	0.471064	0.619204	1.59835e-28	PC3	XIRP1	1.19021e-23	Yes
0.545841	0.467057	0.616026	4.21109e-28	PC3	PLAU	3.13578e-23	Yes
0.544125	0.465147	0.61451	6.65655e-28	PC3	GNB4	4.9568e-23	Yes
0.544093	0.465111	0.614481	6.71461e-28	PC3	CENPI	5.00003e-23	Yes
0.542644	0.463498	0.6132	9.86522e-28	PC3	SAMHD1	7.34614e-23	Yes
0.542021	0.462805	0.612649	1.16304e-27	PC3	BEND6	8.66058e-23	Yes
0.540958	0.461622	0.611709	1.53963e-27	PC3	FCGR3A	1.14649e-22	Yes
0.540838	0.461489	0.611602	1.58922e-27	PC3	C11orf82	1.18341e-22	Yes
0.539254	0.459727	0.610201	2.40852e-27	PC3	PTAFR	1.79351e-22	Yes
0.539156	0.459618	0.610114	2.47142e-27	PC3	SHCBP1	1.84034e-22	Yes
0.53864	0.459045	0.609658	2.82814e-27	PC3	FRMD6	2.10598e-22	Yes
0.538062	0.458402	0.609146	3.28864e-27	PC3	FYB	2.44888e-22	Yes
0.537748	0.458053	0.608868	3.56949e-27	PC3	SLC2A5	2.65802e-22	Yes
0.536228	0.456364	0.607522	5.29836e-27	PC3	CCDC88A	3.94543e-22	Yes
0.534093	0.453992	0.605631	9.19697e-27	PC3	PLXNC1	6.84852e-22	Yes
0.533688	0.453541	0.605272	1.02089e-26	PC3	SAMD9	7.60207e-22	Yes
0.533554	0.453392	0.605153	1.05661e-26	PC3	PLCXD2	7.86805e-22	Yes
0.533486	0.453317	0.605093	1.07512e-26	PC3	TPX2	8.00585e-22	Yes
0.532217	0.451907	0.603968	1.48865e-26	PC3	NCAPH	1.10853e-21	Yes
0.52841	0.447683	0.600593	3.91731e-26	PC3	KIAA1949	2.91702e-21	Yes
0.52828	0.447539	0.600478	4.04806e-26	PC3	BRCA1	3.01439e-21	Yes
0.527955	0.447178	0.60019	4.39389e-26	PC3	TLR6	3.27191e-21	Yes
0.527418	0.446582	0.599713	5.0312e-26	PC3	TGFBI	3.74648e-21	Yes
0.526074	0.445092	0.59852	7.05184e-26	PC3	KIF4A	5.25116e-21	Yes
0.525432	0.44438	0.597951	8.28117e-26	PC3	FPR3	6.16657e-21	Yes
0.523027	0.441715	0.595816	1.50756e-25	PC3	CACNA2D1	1.1226e-20	Yes
0.521144	0.439629	0.594144	2.40161e-25	PC3	DLGAP5	1.78836e-20	Yes
0.520569	0.438992	0.593633	2.76697e-25	PC3	COL6A3	2.06043e-20	Yes
0.520079	0.43845	0.593198	3.12131e-25	PC3	BUB1	2.32428e-20	Yes
0.519424	0.437724	0.592616	3.66592e-25	PC3	ELK3	2.72983e-20	Yes
0.518928	0.437175	0.592175	4.13956e-25	PC3	BICC1	3.08252e-20	Yes
0.518051	0.436205	0.591396	5.12863e-25	PC3	TNFRSF9	3.81903e-20	Yes
0.517921	0.436061	0.591281	5.29358e-25	PC3	KIF15	3.94186e-20	Yes
0.517703	0.435819	0.591087	5.58334e-25	PC3	KIF20B	4.15763e-20	Yes
0.516993	0.435034	0.590456	6.63623e-25	PC3	LHFPL2	4.94167e-20	Yes
0.516056	0.433997	0.589622	8.33293e-25	PC3	FAM111B	6.20511e-20	Yes
0.51398	0.431701	0.587776	1.37614e-24	PC3	C12orf35	1.02474e-19	Yes
0.513668	0.431357	0.587499	1.48314e-24	PC3	ASPM	1.10442e-19	Yes
0.513289	0.430937	0.587161	1.62491e-24	PC3	PLK4	1.20999e-19	Yes
0.513001	0.430619	0.586905	1.74108e-24	PC3	VCAN	1.2965e-19	Yes
0.511939	0.429445	0.58596	2.24579e-24	PC3	LOX	1.67233e-19	Yes
0.511804	0.429295	0.58584	2.31954e-24	PC3	DIAPH3	1.72724e-19	Yes
0.51104	0.428452	0.585161	2.78318e-24	PC3	C18orf54	2.07249e-19	Yes
0.510687	0.428062	0.584846	3.02759e-24	PC3	IGDCC4	2.25449e-19	Yes
0.509331	0.426564	0.583639	4.17864e-24	PC3	CD163	3.11163e-19	Yes
0.509228	0.42645	0.583548	4.28195e-24	PC3	ARHGAP11B	3.18855e-19	Yes
0.508859	0.426042	0.583218	4.67401e-24	PC3	PIP4K2A	3.4805e-19	Yes
0.50872	0.425888	0.583095	4.83014e-24	PC3	TNFSF4	3.59677e-19	Yes
0.508681	0.425846	0.58306	4.87447e-24	PC3	PCDH7	3.62978e-19	Yes
0.508406	0.425541	0.582815	5.20247e-24	PC3	C9orf110	3.87402e-19	Yes
0.507705	0.424767	0.582191	6.1393e-24	PC3	STAT1	4.57163e-19	Yes
0.50755	0.424596	0.582053	6.36765e-24	PC3	CDK6	4.74167e-19	Yes
0.507545	0.424591	0.582049	6.37447e-24	PC3	RIF1	4.74675e-19	Yes
0.507485	0.424525	0.581995	6.46537e-24	PC3	MGC87042	4.81444e-19	Yes
0.50695	0.423934	0.581519	7.33384e-24	PC3	C6orf150	5.46114e-19	Yes
0.506789	0.423756	0.581375	7.61748e-24	PC3	TOP2A	5.67235e-19	Yes
0.506508	0.423446	0.581125	8.13668e-24	PC3	KIF11	6.05898e-19	Yes
0.505838	0.422707	0.580528	9.52195e-24	PC3	KIF14	7.09052e-19	Yes
0.505258	0.422066	0.580011	1.09082e-23	PC3	ITGAV	8.12283e-19	Yes
0.504565	0.421302	0.579394	1.28241e-23	PC3	COL5A2	9.54943e-19	Yes
0.503003	0.419579	0.578002	1.84488e-23	PC3	LILRB4	1.37379e-18	Yes
0.502806	0.419361	0.577826	1.93126e-23	PC3	SYNJ2	1.43811e-18	Yes
0.502408	0.418922	0.577471	2.11824e-23	PC3	LAMB1	1.57734e-18	Yes
0.502226	0.418721	0.577309	2.20948e-23	PC3	WDHD1	1.64529e-18	Yes
0.501937	0.418403	0.577051	2.36212e-23	PC3	CD84	1.75895e-18	Yes
0.501853	0.418309	0.576976	2.40899e-23	PC3	WT1	1.79386e-18	Yes
0.501848	0.418304	0.576972	2.41156e-23	PC3	EPB41L2	1.79577e-18	Yes
0.501504	0.417925	0.576665	2.61108e-23	PC3	ETS1	1.94434e-18	Yes
0.500918	0.417279	0.576143	2.98923e-23	PC3	IL12RB2	2.22593e-18	Yes
0.500781	0.417128	0.57602	3.08569e-23	PC3	KIF2A	2.29776e-18	Yes
0.500677	0.417013	0.575927	3.16027e-23	PC3	PPFIBP1	2.35329e-18	Yes
0.500509	0.416828	0.575777	3.2853e-23	PC3	SGOL2	2.4464e-18	Yes
0.500386	0.416692	0.575667	3.3797e-23	PC3	SLAMF8	2.51669e-18	Yes
0.500342	0.416644	0.575628	3.41387e-23	PC3	THBS2	2.54214e-18	Yes
0.500293	0.41659	0.575585	3.45248e-23	PC3	COL3A1	2.57089e-18	Yes
0.500206	0.416494	0.575507	3.52219e-23	PC3	LILRB2	2.6228e-18	Yes
0.49946	0.415672	0.574842	4.18116e-23	PC3	MMD	3.1135e-18	Yes
0.499178	0.415361	0.57459	4.46025e-23	PC3	ITGA5	3.32133e-18	Yes
0.498419	0.414525	0.573913	5.30739e-23	PC3	ARHGAP11A	3.95215e-18	Yes
0.498286	0.414378	0.573794	5.47141e-23	PC3	AIM1	4.07429e-18	Yes
0.498243	0.414331	0.573756	5.52562e-23	PC3	VCAM1	4.11465e-18	Yes
0.497544	0.41356	0.573132	6.48201e-23	PC3	GSG2	4.82683e-18	Yes
0.496713	0.412645	0.57239	7.83337e-23	PC3	SIGLEC10	5.83312e-18	Yes
0.496568	0.412486	0.572261	8.09491e-23	PC3	DSE	6.02788e-18	Yes
0.495907	0.411757	0.571671	9.40669e-23	PC3	SERPINE1	7.0047e-18	Yes
0.495231	0.411013	0.571068	1.09631e-22	PC3	FAM168A	8.16365e-18	Yes
0.495186	0.410964	0.571027	1.10758e-22	PC3	MMP14	8.24759e-18	Yes
0.494823	0.410563	0.570703	1.20249e-22	PC3	MMP12	8.95437e-18	Yes
0.494723	0.410454	0.570614	1.22981e-22	PC3	PIK3AP1	9.15775e-18	Yes
0.494614	0.410334	0.570517	1.26045e-22	PC3	CYBB	9.38597e-18	Yes
0.494444	0.410146	0.570364	1.31e-22	PC3	CXCL10	9.75494e-18	Yes
0.494263	0.409947	0.570203	1.36455e-22	PC3	RNF168	1.01611e-17	Yes
0.494258	0.409941	0.570198	1.36621e-22	PC3	KIF23	1.01735e-17	Yes
0.493295	0.408882	0.569339	1.69703e-22	PC3	SGOL1	1.26369e-17	Yes
0.49319	0.408766	0.569244	1.73779e-22	PC3	SACS	1.29405e-17	Yes
0.493021	0.408581	0.569094	1.8047e-22	PC3	TNFAIP3	1.34387e-17	Yes
0.492871	0.408415	0.56896	1.86693e-22	PC3	ADAMTS2	1.39021e-17	Yes
0.492256	0.407739	0.568411	2.14284e-22	PC3	C14orf145	1.59567e-17	Yes
0.492105	0.407572	0.568276	2.21666e-22	PC3	SLC9A7	1.65064e-17	Yes
0.492016	0.407474	0.568196	2.26144e-22	PC3	WIPF1	1.68398e-17	Yes
0.491899	0.407345	0.568091	2.32163e-22	PC3	CD209	1.7288e-17	Yes
0.491775	0.407209	0.567981	2.38693e-22	PC3	SLC2A14	1.77743e-17	Yes
0.491747	0.407179	0.567956	2.40161e-22	PC3	TAOK1	1.78836e-17	Yes
0.491709	0.407136	0.567921	2.42257e-22	PC3	EPSTI1	1.80396e-17	Yes
0.491376	0.40677	0.567624	2.60977e-22	PC3	44815	1.94336e-17	Yes
0.490702	0.406029	0.567022	3.03319e-22	PC3	LNPEP	2.25866e-17	Yes
0.49051	0.405817	0.56685	3.16643e-22	PC3	HAPLN3	2.35788e-17	Yes
0.48946	0.404662	0.565912	3.9996e-22	PC3	FBN1	2.9783e-17	Yes
0.488678	0.403802	0.565212	4.75746e-22	PC3	HMGA2	3.54265e-17	Yes
0.487919	0.402968	0.564534	5.62736e-22	PC3	SAMD9L	4.19042e-17	Yes
0.487803	0.402841	0.56443	5.77313e-22	PC3	KLHL5	4.29896e-17	Yes
0.487338	0.402329	0.564014	6.3978e-22	PC3	POSTN	4.76412e-17	Yes
0.486965	0.401919	0.563681	6.94594e-22	PC3	TTK	5.17229e-17	Yes
0.486647	0.40157	0.563397	7.44947e-22	PC3	SNAI2	5.54725e-17	Yes
0.484928	0.399681	0.561858	1.08643e-21	PC3	POLQ	8.09011e-17	Yes
0.483977	0.398636	0.561008	1.33733e-21	PC3	STIL	9.95846e-17	Yes
0.483812	0.398455	0.56086	1.38628e-21	PC3	TNC	1.03229e-16	Yes
0.483079	0.397651	0.560205	1.62602e-21	PC3	CENPF	1.21081e-16	Yes
0.482989	0.397552	0.560124	1.65828e-21	PC3	CORO1C	1.23484e-16	Yes
0.482829	0.397375	0.55998	1.71718e-21	PC3	KIAA0754	1.2787e-16	Yes
0.482504	0.397018	0.559689	1.84276e-21	PC3	GPR84	1.37221e-16	Yes
0.482272	0.396765	0.559482	1.93759e-21	PC3	GREB1L	1.44283e-16	Yes
0.482102	0.396577	0.559329	2.01075e-21	PC3	DST	1.49731e-16	Yes
0.481782	0.396226	0.559043	2.15484e-21	PC3	NID2	1.6046e-16	Yes
0.481558	0.395981	0.558843	2.26182e-21	PC3	MELK	1.68426e-16	Yes
0.481152	0.395535	0.558479	2.4697e-21	PC3	STRN	1.83906e-16	Yes
0.480563	0.394888	0.557951	2.80487e-21	PC3	RASAL2	2.08865e-16	Yes
0.480267	0.394564	0.557687	2.98922e-21	PC3	PIK3CG	2.22592e-16	Yes
0.48016	0.394446	0.557591	3.05916e-21	PC3	BARD1	2.278e-16	Yes
0.480018	0.39429	0.557463	3.15447e-21	PC3	CDCA5	2.34898e-16	Yes
0.479954	0.39422	0.557406	3.19803e-21	PC3	MAN2A1	2.38141e-16	Yes
0.479162	0.393351	0.556697	3.79189e-21	PC3	MFI2	2.82363e-16	Yes
0.478433	0.392551	0.556044	4.4332e-21	PC3	SLC2A3	3.30118e-16	Yes
0.478122	0.392209	0.555765	4.73922e-21	PC3	CEP55	3.52906e-16	Yes
0.477832	0.391892	0.555506	5.04172e-21	PC3	COL12A1	3.75432e-16	Yes
0.477555	0.391588	0.555257	5.34988e-21	PC3	EMR2	3.98378e-16	Yes
0.476942	0.390915	0.554708	6.0974e-21	PC3	HS3ST3A1	4.54043e-16	Yes
0.47691	0.39088	0.554679	6.13956e-21	PC3	CCDC80	4.57182e-16	Yes
0.476813	0.390774	0.554592	6.26782e-21	PC3	SPOCK1	4.66733e-16	Yes
0.476638	0.390582	0.554435	6.50546e-21	PC3	SEMA3C	4.84429e-16	Yes
0.476565	0.390502	0.55437	6.60779e-21	PC3	ACTN1	4.92049e-16	Yes
0.47618	0.39008	0.554025	7.17123e-21	PC3	CDCA2	5.34005e-16	Yes
0.476006	0.389889	0.553869	7.44171e-21	PC3	CCNA2	5.54147e-16	Yes
0.475912	0.389786	0.553785	7.59208e-21	PC3	PHLDB2	5.65344e-16	Yes
0.475786	0.389649	0.553672	7.79681e-21	PC3	TSHZ3	5.80589e-16	Yes
0.475557	0.389397	0.553467	8.18582e-21	PC3	DEPDC1	6.09557e-16	Yes
0.475503	0.389338	0.553418	8.28023e-21	PC3	CCL4	6.16587e-16	Yes
0.47457	0.388316	0.552582	1.00891e-20	PC3	DOCK11	7.51284e-16	Yes
0.474314	0.388035	0.552353	1.06505e-20	PC3	BMP2K	7.93092e-16	Yes
0.473933	0.387617	0.55201	1.15447e-20	PC3	COL1A2	8.59677e-16	Yes
0.473402	0.387035	0.551535	1.29109e-20	PC3	SMC2	9.61412e-16	Yes
0.473053	0.386653	0.551222	1.38961e-20	PC3	FPR2	1.03477e-15	Yes
0.472855	0.386435	0.551044	1.44884e-20	PC3	TMEM158	1.07888e-15	Yes
0.472375	0.385909	0.550613	1.6027e-20	PC3	MCM10	1.19345e-15	Yes
0.47236	0.385894	0.5506	1.60756e-20	PC3	HOXA1	1.19707e-15	Yes
0.47213	0.385641	0.550393	1.68724e-20	PC3	COL11A1	1.2564e-15	Yes
0.471363	0.384801	0.549706	1.98133e-20	PC3	SERPINB9	1.47539e-15	Yes
0.470672	0.384044	0.549085	2.28947e-20	PC3	CHST11	1.70485e-15	Yes
0.470174	0.3835	0.548639	2.53986e-20	PC3	IGF2BP2	1.8913e-15	Yes
0.469873	0.38317	0.548369	2.70441e-20	PC3	TLR8	2.01384e-15	Yes
0.469206	0.382439	0.54777	3.10731e-20	PC3	FAP	2.31386e-15	Yes
0.469081	0.382303	0.547658	3.18866e-20	PC3	ADAMTS4	2.37444e-15	Yes
0.468784	0.381978	0.547391	3.39163e-20	PC3	KIF2C	2.52557e-15	Yes
0.468684	0.381868	0.547302	3.46264e-20	PC3	C15orf42	2.57846e-15	Yes
0.468145	0.381278	0.546818	3.8722e-20	PC3	ASXL2	2.88343e-15	Yes
0.468099	0.381227	0.546776	3.9098e-20	PC3	IL7R	2.91143e-15	Yes
0.468035	0.381158	0.546719	3.96123e-20	PC3	CCR5	2.94973e-15	Yes
0.467602	0.380684	0.54633	4.3328e-20	PC3	GNA13	3.22642e-15	Yes
0.467362	0.380421	0.546115	4.55281e-20	PC3	MGAT5	3.39025e-15	Yes
0.466636	0.379627	0.545463	5.28863e-20	PC3	DEPDC1B	3.93818e-15	Yes
0.466572	0.379557	0.545405	5.359e-20	PC3	AXL	3.99058e-15	Yes
0.466552	0.379535	0.545388	5.38095e-20	PC3	ANGPTL2	4.00692e-15	Yes
0.466131	0.379074	0.545009	5.86846e-20	PC3	LILRB1	4.36995e-15	Yes
0.46573	0.378636	0.544649	6.37266e-20	PC3	NFATC2	4.7454e-15	Yes
0.4657	0.378603	0.544622	6.41237e-20	PC3	MYO5A	4.77497e-15	Yes
0.465584	0.378475	0.544518	6.56765e-20	PC3	NCAPG	4.8906e-15	Yes
0.464924	0.377753	0.543925	7.51998e-20	PC3	SIRPA	5.59975e-15	Yes
0.464313	0.377086	0.543376	8.52151e-20	PC3	ATAD5	6.34554e-15	Yes
0.464303	0.377075	0.543367	8.53918e-20	PC3	L1CAM	6.3587e-15	Yes
0.464261	0.377029	0.543329	8.61263e-20	PC3	GBP4	6.41339e-15	Yes
0.464223	0.376987	0.543295	8.68073e-20	PC3	RRM2	6.4641e-15	Yes
0.464146	0.376903	0.543226	8.81679e-20	PC3	HELLS	6.56543e-15	Yes
0.464063	0.376813	0.543152	8.96755e-20	PC3	FNDC3B	6.67769e-15	Yes
0.463873	0.376604	0.542981	9.3235e-20	PC3	SLC36A1	6.94274e-15	Yes
0.463535	0.376235	0.542677	9.98919e-20	PC3	ALPK2	7.43845e-15	Yes
0.463433	0.376123	0.542585	1.02001e-19	PC3	ESPL1	7.59549e-15	Yes
0.462921	0.375563	0.542125	1.13217e-19	PC3	CNTLN	8.43069e-15	Yes
0.462781	0.37541	0.541999	1.16492e-19	PC3	BUB1B	8.67455e-15	Yes
0.462643	0.37526	0.541876	1.19797e-19	PC3	DTL	8.92069e-15	Yes
0.462534	0.37514	0.541777	1.22493e-19	PC3	SLC2A1	9.12142e-15	Yes
0.462345	0.374934	0.541608	1.2728e-19	PC3	SPHK1	9.4779e-15	Yes
0.461031	0.373497	0.540426	1.66162e-19	PC3	PLOD2	1.23732e-14	Yes
0.460958	0.373418	0.540361	1.68619e-19	PC3	TNFAIP6	1.25562e-14	Yes
0.460579	0.373004	0.54002	1.82048e-19	PC3	ERO1L	1.35562e-14	Yes
0.460462	0.372876	0.539915	1.86413e-19	PC3	GPR115	1.38813e-14	Yes
0.460273	0.37267	0.539745	1.93631e-19	PC3	SEMA7A	1.44188e-14	Yes
0.460181	0.372569	0.539662	1.97298e-19	PC3	INCENP	1.46918e-14	Yes
0.459989	0.372359	0.53949	2.05072e-19	PC3	TBC1D1	1.52707e-14	Yes
0.458123	0.370321	0.537811	2.98444e-19	PC3	C3AR1	2.22236e-14	Yes
0.457543	0.369687	0.537289	3.35184e-19	PC3	LAMC2	2.49595e-14	Yes
0.457245	0.369362	0.537022	3.55734e-19	PC3	NRP2	2.64897e-14	Yes
0.457203	0.369316	0.536983	3.58762e-19	PC3	AIM2	2.67152e-14	Yes
0.456927	0.369015	0.536735	3.79097e-19	PC3	FAM83D	2.82295e-14	Yes
0.456513	0.368563	0.536363	4.11698e-19	PC3	PALM2_AKAP2	3.06571e-14	Yes
0.455684	0.367659	0.535617	4.85542e-19	PC3	CALU	3.61559e-14	Yes
0.455632	0.367601	0.53557	4.9067e-19	PC3	ERCC6L	3.65378e-14	Yes
0.455509	0.367467	0.535459	5.02778e-19	PC3	SEMA3A	3.74394e-14	Yes
0.455504	0.367462	0.535455	5.03253e-19	PC3	CBL	3.74747e-14	Yes
0.455415	0.367364	0.535374	5.123e-19	PC3	LMNB1	3.81484e-14	Yes
0.455325	0.367267	0.535294	5.21456e-19	PC3	KIF18B	3.88302e-14	Yes
0.454914	0.366818	0.534924	5.65763e-19	PC3	RASA2	4.21296e-14	Yes
0.454905	0.366808	0.534915	5.66869e-19	PC3	C6orf204	4.22119e-14	Yes
0.454807	0.366701	0.534827	5.77935e-19	PC3	BNC2	4.30359e-14	Yes
0.454614	0.366491	0.534654	6.00422e-19	PC3	IL2RB	4.47104e-14	Yes
0.454581	0.366454	0.534624	6.04456e-19	PC3	SSH1	4.50108e-14	Yes
0.45437	0.366225	0.534434	6.30178e-19	PC3	FOXM1	4.69262e-14	Yes
0.454234	0.366076	0.534312	6.47397e-19	PC3	HJURP	4.82084e-14	Yes
0.453358	0.36512	0.533522	7.69816e-19	PC3	CXCL9	5.73243e-14	Yes
0.453304	0.365061	0.533474	7.78005e-19	PC3	COL1A1	5.79341e-14	Yes
0.453278	0.365033	0.533451	7.82025e-19	PC3	UBXN7	5.82335e-14	Yes
0.45316	0.364904	0.533344	8.00475e-19	PC3	SLC1A3	5.96074e-14	Yes
0.453111	0.36485	0.5333	8.08206e-19	PC3	PRR16	6.0183e-14	Yes
0.453056	0.364791	0.533251	8.16942e-19	PC3	SBNO1	6.08336e-14	Yes
0.452984	0.364712	0.533186	8.28681e-19	PC3	NDC80	6.17078e-14	Yes
0.452866	0.364583	0.53308	8.4817e-19	PC3	NCAPG2	6.3159e-14	Yes
0.452702	0.364404	0.532932	8.76058e-19	PC3	KIRREL	6.52357e-14	Yes
0.452374	0.364047	0.532637	9.34334e-19	PC3	CCL8	6.95752e-14	Yes
0.452336	0.364005	0.532602	9.41458e-19	PC3	SLC30A4	7.01057e-14	Yes
0.452316	0.363984	0.532585	9.45046e-19	PC3	SULF2	7.03729e-14	Yes
0.452249	0.36391	0.532524	9.57639e-19	PC3	TNS3	7.13106e-14	Yes
0.452205	0.363862	0.532485	9.65956e-19	PC3	ITPRIPL1	7.19299e-14	Yes
0.452188	0.363844	0.53247	9.69105e-19	PC3	PTPRC	7.21644e-14	Yes
0.452155	0.363808	0.532439	9.75538e-19	PC3	ATP13A3	7.26434e-14	Yes
0.452028	0.36367	0.532325	1.00013e-18	PC3	FAM101A	7.44747e-14	Yes
0.451684	0.363295	0.532016	1.06996e-18	PC3	MEFV	7.96748e-14	Yes
0.45153	0.363127	0.531877	1.10277e-18	PC3	IPMK	8.2118e-14	Yes
0.451524	0.36312	0.531871	1.1041e-18	PC3	MICAL3	8.2217e-14	Yes
0.451393	0.362977	0.531753	1.13294e-18	PC3	CDC6	8.43643e-14	Yes
0.451096	0.362653	0.531486	1.20071e-18	PC3	RC3H2	8.94108e-14	Yes
0.450988	0.362536	0.531389	1.22631e-18	PC3	COL5A1	9.13172e-14	Yes
0.450733	0.362257	0.531159	1.28918e-18	PC3	FAM55C	9.59989e-14	Yes
0.450725	0.362249	0.531152	1.29117e-18	PC3	HAS2	9.61473e-14	Yes
0.450234	0.361713	0.530709	1.42121e-18	PC3	TIMP2	1.05831e-13	Yes
0.449012	0.360381	0.529608	1.80341e-18	PC3	ZNF367	1.34291e-13	Yes
0.448608	0.359941	0.529244	1.95071e-18	PC3	FAM26E	1.4526e-13	Yes
0.447934	0.359207	0.528637	2.22321e-18	PC3	LOXL2	1.65552e-13	Yes
0.44774	0.358995	0.528461	2.30856e-18	PC3	NCEH1	1.71907e-13	Yes
0.447641	0.358887	0.528372	2.35314e-18	PC3	CDK5R1	1.75226e-13	Yes
0.447637	0.358883	0.528369	2.35491e-18	PC3	KIAA1432	1.75358e-13	Yes
0.447403	0.358628	0.528157	2.46432e-18	PC3	SAMD8	1.83506e-13	Yes
0.44727	0.358483	0.528038	2.52833e-18	PC3	TSC22D2	1.88272e-13	Yes
0.447242	0.358453	0.528013	2.54188e-18	PC3	IL18R1	1.89281e-13	Yes
0.446713	0.357876	0.527536	2.81564e-18	PC3	SEC23A	2.09666e-13	Yes
0.446503	0.357648	0.527346	2.93199e-18	PC3	RAD54L	2.1833e-13	Yes
0.446021	0.357122	0.526911	3.21776e-18	PC3	PDPN	2.39611e-13	Yes
0.445654	0.356723	0.526581	3.45306e-18	PC3	CTHRC1	2.57132e-13	Yes
0.445447	0.356498	0.526394	3.59295e-18	PC3	TNFSF13B	2.67549e-13	Yes
0.445183	0.35621	0.526156	3.78042e-18	PC3	CD86	2.81509e-13	Yes
0.444746	0.355734	0.525762	4.11086e-18	PC3	P2RX7	3.06115e-13	Yes
0.444671	0.355653	0.525694	4.17037e-18	PC3	PIK3CA	3.10547e-13	Yes
0.444188	0.355126	0.525258	4.57526e-18	PC3	AQP9	3.40697e-13	Yes
0.444101	0.355032	0.525179	4.65212e-18	PC3	CD226	3.4642e-13	Yes
0.443927	0.354842	0.525023	4.80958e-18	PC3	BHLHE41	3.58145e-13	Yes
0.443529	0.354409	0.524664	5.18963e-18	PC3	GZMB	3.86446e-13	Yes
0.442787	0.353602	0.523995	5.97803e-18	PC3	LDLRAD3	4.45154e-13	Yes
0.442501	0.35329	0.523736	6.31339e-18	PC3	TRIM59	4.70127e-13	Yes
0.442408	0.353189	0.523652	6.42612e-18	PC3	STXBP5	4.78521e-13	Yes
0.442064	0.352814	0.523342	6.86112e-18	PC3	ADAMDEC1	5.10913e-13	Yes
0.441118	0.351786	0.522488	8.20938e-18	PC3	KIF3C	6.11311e-13	Yes
0.440897	0.351545	0.522289	8.56075e-18	PC3	NEXN	6.37477e-13	Yes
0.440885	0.351532	0.522278	8.58076e-18	PC3	DACT1	6.38966e-13	Yes
0.440449	0.351058	0.521884	9.31832e-18	PC3	STAMBPL1	6.93889e-13	Yes
0.440409	0.351014	0.521848	9.38941e-18	PC3	LCP2	6.99183e-13	Yes
0.440184	0.35077	0.521645	9.79704e-18	PC3	C3orf59	7.29537e-13	Yes
0.440081	0.350657	0.521552	9.99011e-18	PC3	FAM72A	7.43913e-13	Yes
0.440058	0.350633	0.521532	1.00323e-17	PC3	TRPS1	7.47053e-13	Yes
0.440042	0.350615	0.521517	1.00628e-17	PC3	XRCC2	7.49329e-13	Yes
0.439911	0.350472	0.521398	1.03157e-17	PC3	GTSE1	7.68157e-13	Yes
0.439709	0.350253	0.521216	1.07156e-17	PC3	HSD11B1	7.97934e-13	Yes
0.439709	0.350253	0.521216	1.07157e-17	PC3	ADAM10	7.97943e-13	Yes
0.439597	0.350132	0.521115	1.09439e-17	PC3	IL21R	8.14936e-13	Yes
0.43958	0.350112	0.521099	1.09809e-17	PC3	LUZP1	8.17692e-13	Yes
0.439445	0.349965	0.520977	1.1264e-17	PC3	MCM6	8.3877e-13	Yes
0.439217	0.349718	0.520772	1.17573e-17	PC3	CDCA8	8.75509e-13	Yes
0.438883	0.349355	0.52047	1.25204e-17	PC3	STEAP1	9.32332e-13	Yes
0.438798	0.349263	0.520394	1.27212e-17	PC3	HIF1A	9.47281e-13	Yes
0.438614	0.349062	0.520227	1.31707e-17	PC3	ROR1	9.80756e-13	Yes
0.438185	0.348596	0.51984	1.42745e-17	PC3	TIGIT	1.06295e-12	Yes
0.438185	0.348595	0.51984	1.4276e-17	PC3	KPNA2	1.06306e-12	Yes
0.438007	0.348403	0.519679	1.47588e-17	PC3	CCDC75	1.09902e-12	Yes
0.43744	0.347786	0.519167	1.64142e-17	PC3	DENND5B	1.22228e-12	Yes
0.437094	0.34741	0.518855	1.75115e-17	PC3	RAB8B	1.304e-12	Yes
0.436868	0.347165	0.518651	1.82664e-17	PC3	TFEC	1.36021e-12	Yes
0.436837	0.34713	0.518622	1.83748e-17	PC3	PRRX1	1.36828e-12	Yes
0.436665	0.346943	0.518467	1.89747e-17	PC3	PLK1	1.41295e-12	Yes
0.436176	0.346412	0.518025	2.0787e-17	PC3	CD163L1	1.5479e-12	Yes
0.435847	0.346055	0.517728	2.20992e-17	PC3	WDR76	1.64561e-12	Yes
0.435723	0.34592	0.517616	2.26162e-17	PC3	CCR1	1.68412e-12	Yes
0.435713	0.345909	0.517607	2.26579e-17	PC3	BACH2	1.68722e-12	Yes
0.435069	0.345209	0.517024	2.55437e-17	PC3	SH2B3	1.90211e-12	Yes
0.434632	0.344734	0.516629	2.77026e-17	PC3	LOC100126784	2.06288e-12	Yes
0.434601	0.3447	0.516601	2.78627e-17	PC3	BRWD3	2.0748e-12	Yes
0.434538	0.344632	0.516545	2.81867e-17	PC3	C14orf49	2.09893e-12	Yes
0.43446	0.344547	0.516474	2.86011e-17	PC3	EOMES	2.12978e-12	Yes
0.434142	0.344202	0.516187	3.03357e-17	PC3	THBS1	2.25895e-12	Yes
0.433794	0.343824	0.515873	3.235e-17	PC3	MAP3K2	2.40894e-12	Yes
0.433596	0.343609	0.515693	3.35594e-17	PC3	ITGA6	2.499e-12	Yes
0.43298	0.342939	0.515136	3.76058e-17	PC3	HEG1	2.80032e-12	Yes
0.432929	0.342884	0.51509	3.7958e-17	PC3	NUP155	2.82654e-12	Yes
0.432741	0.34268	0.51492	3.92978e-17	PC3	OLFML2B	2.92631e-12	Yes
0.432616	0.342544	0.514807	4.02143e-17	PC3	AOAH	2.99456e-12	Yes
0.432437	0.342351	0.514646	4.15581e-17	PC3	ORC1L	3.09462e-12	Yes
0.432046	0.341925	0.514292	4.4663e-17	PC3	TOPBP1	3.32583e-12	Yes
0.431953	0.341824	0.514207	4.54347e-17	PC3	DOCK2	3.38329e-12	Yes
0.431433	0.34126	0.513737	4.99855e-17	PC3	C10orf12	3.72217e-12	Yes
0.431034	0.340827	0.513376	5.37858e-17	PC3	ABCA1	4.00516e-12	Yes
0.430606	0.340362	0.512989	5.81678e-17	PC3	SIRPB1	4.33147e-12	Yes
0.430192	0.339913	0.512614	6.27482e-17	PC3	TRAM2	4.67255e-12	Yes
0.430027	0.339734	0.512465	6.46684e-17	PC3	ZEB2	4.81553e-12	Yes
0.429284	0.338928	0.511793	7.40554e-17	PC3	LRRC15	5.51453e-12	Yes
0.429094	0.338721	0.511621	7.66619e-17	PC3	CXCL11	5.70863e-12	Yes
0.429067	0.338692	0.511597	7.7037e-17	PC3	RND3	5.73656e-12	Yes
0.428962	0.338578	0.511502	7.85266e-17	PC3	SHOX2	5.84748e-12	Yes
0.428885	0.338495	0.511432	7.96323e-17	PC3	CPXM1	5.92982e-12	Yes
0.428738	0.338335	0.511299	8.17991e-17	PC3	IGF2BP3	6.09117e-12	Yes
0.428605	0.338191	0.511179	8.3801e-17	PC3	LAMA4	6.24024e-12	Yes
0.428575	0.338159	0.511152	8.42528e-17	PC3	EXO1	6.27389e-12	Yes
0.428465	0.338039	0.511052	8.59592e-17	PC3	IKZF3	6.40095e-12	Yes
0.428403	0.337972	0.510997	8.69229e-17	PC3	GTF2A1	6.47271e-12	Yes
0.428394	0.337962	0.510988	8.70691e-17	PC3	CSMD2	6.4836e-12	Yes
0.42824	0.337795	0.510848	8.95482e-17	PC3	TFRC	6.66821e-12	Yes
0.42803	0.337567	0.510659	9.30184e-17	PC3	CPD	6.92661e-12	Yes
0.427971	0.337503	0.510605	9.40286e-17	PC3	TSHZ2	7.00184e-12	Yes
0.427592	0.337092	0.510262	1.00719e-16	PC3	RAD51AP1	7.50001e-12	Yes
0.427497	0.336989	0.510176	1.02462e-16	PC3	CENPA	7.62986e-12	Yes
0.426936	0.336381	0.509668	1.13413e-16	PC3	ELOVL6	8.4453e-12	Yes
0.426936	0.33638	0.509668	1.13417e-16	PC3	C6orf167	8.44558e-12	Yes
0.426864	0.336302	0.509603	1.14899e-16	PC3	LRRC8C	8.55598e-12	Yes
0.426646	0.336066	0.509405	1.19526e-16	PC3	MMP3	8.90049e-12	Yes
0.42658	0.335994	0.509346	1.20959e-16	PC3	DNMT1	9.00721e-12	Yes
0.426556	0.335968	0.509324	1.21485e-16	PC3	IL4I1	9.04636e-12	Yes
0.426417	0.335817	0.509198	1.24571e-16	PC3	FPR1	9.27615e-12	Yes
0.426405	0.335805	0.509188	1.24824e-16	PC3	STK4	9.29505e-12	Yes
0.42638	0.335778	0.509165	1.25392e-16	PC3	ZBED2	9.33728e-12	Yes
0.426328	0.335722	0.509118	1.2657e-16	PC3	GOLIM4	9.42502e-12	Yes
0.426131	0.335507	0.508939	1.31167e-16	PC3	NIN	9.76734e-12	Yes
0.426075	0.335447	0.508889	1.32488e-16	PC3	MARCKS	9.86572e-12	Yes
0.425652	0.334989	0.508506	1.42975e-16	PC3	FSTL1	1.06466e-11	Yes
0.425593	0.334924	0.508452	1.4451e-16	PC3	MYBL1	1.07609e-11	Yes
0.425404	0.334719	0.508281	1.49512e-16	PC3	ANO6	1.11334e-11	Yes
0.425005	0.334287	0.50792	1.60631e-16	PC3	SLC20A1	1.19614e-11	Yes
0.424948	0.334225	0.507869	1.62278e-16	PC3	ITGA2	1.2084e-11	Yes
0.424945	0.334222	0.507866	1.62374e-16	PC3	CMTM1	1.20912e-11	Yes
0.424916	0.33419	0.507839	1.63227e-16	PC3	SAMSN1	1.21547e-11	Yes
0.424885	0.334157	0.507811	1.6413e-16	PC3	AKT3	1.22219e-11	Yes
0.424631	0.333881	0.507581	1.71799e-16	PC3	GLIPR1	1.2793e-11	Yes
0.424349	0.333576	0.507326	1.80688e-16	PC3	HIVEP3	1.3455e-11	Yes
0.424177	0.33339	0.50717	1.8635e-16	PC3	CLIC4	1.38765e-11	Yes
0.424116	0.333323	0.507115	1.88397e-16	PC3	TMEM200A	1.4029e-11	Yes
0.423996	0.333193	0.507006	1.92504e-16	PC3	TIAM1	1.43348e-11	Yes
0.423563	0.332724	0.506614	2.08e-16	PC3	ADAM22	1.54887e-11	Yes
0.423368	0.332512	0.506437	2.15386e-16	PC3	CEP97	1.60387e-11	Yes
0.423322	0.332463	0.506396	2.17158e-16	PC3	AKAP5	1.61707e-11	Yes
0.423204	0.332335	0.506289	2.21797e-16	PC3	SKA1	1.65161e-11	Yes
0.4227	0.331788	0.505832	2.42679e-16	PC3	KIAA1211	1.80711e-11	Yes
0.422675	0.331761	0.505809	2.43767e-16	PC3	SIRPB2	1.81521e-11	Yes
0.422575	0.331653	0.505719	2.48135e-16	PC3	DDR2	1.84774e-11	Yes
0.422442	0.331509	0.505598	2.54095e-16	PC3	STEAP2	1.89212e-11	Yes
0.422317	0.331374	0.505485	2.59799e-16	PC3	PALLD	1.93459e-11	Yes
0.421812	0.330827	0.505028	2.84224e-16	PC3	MYBL2	2.11647e-11	Yes
0.421533	0.330524	0.504775	2.98676e-16	PC3	44621	2.22409e-11	Yes
0.421499	0.330487	0.504744	3.00495e-16	PC3	MICB	2.23764e-11	Yes
0.421052	0.330003	0.504339	3.25283e-16	PC3	KIFC1	2.42222e-11	Yes
0.420993	0.32994	0.504286	3.28689e-16	PC3	BBX	2.44759e-11	Yes
0.420714	0.329638	0.504033	3.45353e-16	PC3	MCM4	2.57167e-11	Yes
0.420683	0.329603	0.504004	3.47303e-16	PC3	FBXO5	2.58619e-11	Yes
0.420212	0.329093	0.503577	3.77484e-16	PC3	FCGR2C	2.81094e-11	Yes
0.420165	0.329043	0.503535	3.80621e-16	PC3	AVL9	2.8343e-11	Yes
0.420116	0.32899	0.50349	3.83918e-16	PC3	LOXL3	2.85885e-11	Yes
0.420056	0.328924	0.503436	3.88042e-16	PC3	STK10	2.88955e-11	Yes
0.419959	0.328819	0.503348	3.94741e-16	PC3	COL15A1	2.93944e-11	Yes
0.419914	0.328771	0.503307	3.97873e-16	PC3	CEP135	2.96276e-11	Yes
0.419912	0.328769	0.503306	3.98006e-16	PC3	NCKAP1L	2.96375e-11	Yes
0.419655	0.328491	0.503073	4.16459e-16	PC3	EIF5A2	3.10116e-11	Yes
0.419004	0.327785	0.502482	4.67179e-16	PC3	IRS1	3.47885e-11	Yes
0.418384	0.327114	0.50192	5.2103e-16	PC3	CMKLR1	3.87985e-11	Yes
0.418255	0.326975	0.501803	5.32907e-16	PC3	PAK2	3.96829e-11	Yes
0.418158	0.32687	0.501715	5.42103e-16	PC3	NUP205	4.03677e-11	Yes
0.417878	0.326566	0.501461	5.69459e-16	PC3	CCNT1	4.24047e-11	Yes
0.417546	0.326207	0.50116	6.03544e-16	PC3	P2RY1	4.49429e-11	Yes
0.417543	0.326204	0.501157	6.03881e-16	PC3	TMEM48	4.4968e-11	Yes
0.417334	0.325978	0.500968	6.26371e-16	PC3	RACGAP1	4.66427e-11	Yes
0.417141	0.325769	0.500792	6.47962e-16	PC3	XRN1	4.82505e-11	Yes
0.416541	0.32512	0.500248	7.19628e-16	PC3	PLEK	5.35871e-11	Yes
0.416533	0.325111	0.500241	7.20614e-16	PC3	KIF18A	5.36605e-11	Yes
0.416368	0.324933	0.500092	7.41634e-16	PC3	SLAMF7	5.52258e-11	Yes
0.416362	0.324927	0.500087	7.42382e-16	PC3	TLR4	5.52815e-11	Yes
0.41609	0.324632	0.49984	7.78465e-16	PC3	CHEK1	5.79684e-11	Yes
0.416087	0.324628	0.499836	7.78982e-16	PC3	FAM26F	5.80069e-11	Yes
0.415801	0.324319	0.499577	8.18808e-16	PC3	GLT25D1	6.09726e-11	Yes
0.415531	0.324027	0.499332	8.58191e-16	PC3	NRIP1	6.39052e-11	Yes
0.415474	0.323966	0.499281	8.66728e-16	PC3	ABCD2	6.45409e-11	Yes
0.415186	0.323654	0.499019	9.11238e-16	PC3	SCLT1	6.78553e-11	Yes
0.41433	0.322729	0.498243	1.05725e-15	PC3	PRC1	7.87278e-11	Yes
0.413934	0.322299	0.497883	1.13248e-15	PC3	ACAP2	8.43304e-11	Yes
0.41388	0.322242	0.497834	1.14297e-15	PC3	TPM4	8.51112e-11	Yes
0.413311	0.321626	0.497317	1.2614e-15	PC3	HAVCR2	9.39298e-11	Yes
0.41324	0.321549	0.497253	1.27697e-15	PC3	ATP10D	9.50894e-11	Yes
0.412798	0.321071	0.496852	1.37813e-15	PC3	CD80	1.02622e-10	Yes
0.41261	0.320869	0.496681	1.42345e-15	PC3	PATL1	1.05997e-10	Yes
0.412345	0.320582	0.49644	1.4901e-15	PC3	B3GNT5	1.1096e-10	Yes
0.412307	0.320541	0.496406	1.49985e-15	PC3	FHOD3	1.11686e-10	Yes
0.412214	0.320441	0.496322	1.52393e-15	PC3	MCM2	1.13479e-10	Yes
0.411888	0.320088	0.496026	1.61193e-15	PC3	CD3G	1.20033e-10	Yes
0.411619	0.319797	0.495781	1.68831e-15	PC3	MAD2L1	1.2572e-10	Yes
0.411447	0.319611	0.495625	1.73906e-15	PC3	CTSL2	1.29499e-10	Yes
0.411418	0.31958	0.495599	1.74755e-15	PC3	SLFN11	1.30131e-10	Yes
0.411392	0.319552	0.495575	1.75545e-15	PC3	TNFSF8	1.3072e-10	Yes
0.411379	0.319538	0.495563	1.75937e-15	PC3	ADAM17	1.31012e-10	Yes
0.410832	0.318946	0.495067	1.93246e-15	PC3	ITGB3	1.43901e-10	Yes
0.410654	0.318754	0.494905	1.99226e-15	PC3	DOCK10	1.48353e-10	Yes
0.410591	0.318686	0.494848	2.01391e-15	PC3	FLNC	1.49966e-10	Yes
0.410435	0.318517	0.494706	2.06841e-15	PC3	REST	1.54024e-10	Yes
0.410178	0.31824	0.494473	2.16127e-15	PC3	VCL	1.60939e-10	Yes
0.410164	0.318224	0.49446	2.16666e-15	PC3	PRKDC	1.61341e-10	Yes
0.409899	0.317938	0.494219	2.26711e-15	PC3	ESCO2	1.6882e-10	Yes
0.40971	0.317734	0.494047	2.34148e-15	PC3	LCP1	1.74358e-10	Yes
0.409598	0.317613	0.493946	2.38652e-15	PC3	ALDH1L2	1.77712e-10	Yes
0.409479	0.317485	0.493838	2.43547e-15	PC3	SKA3	1.81357e-10	Yes
0.409396	0.317395	0.493762	2.47021e-15	PC3	CENPK	1.83944e-10	Yes
0.40937	0.317367	0.493739	2.48116e-15	PC3	MMP2	1.84759e-10	Yes
0.409322	0.317315	0.493695	2.50156e-15	PC3	SLC16A6	1.86279e-10	Yes
0.40931	0.317302	0.493684	2.50661e-15	PC3	SNAI1	1.86655e-10	Yes
0.409229	0.317215	0.493611	2.54138e-15	PC3	SPAG5	1.89244e-10	Yes
0.409068	0.317041	0.493465	2.61208e-15	PC3	NAV3	1.94509e-10	Yes
0.408866	0.316822	0.493281	2.70384e-15	PC3	NUSAP1	2.01341e-10	Yes
0.408734	0.31668	0.493161	2.76497e-15	PC3	ATP11C	2.05894e-10	Yes
0.408725	0.31667	0.493153	2.76926e-15	PC3	SKP2	2.06213e-10	Yes
0.408707	0.31665	0.493136	2.77806e-15	PC3	MMP9	2.06869e-10	Yes
0.40856	0.316492	0.493003	2.8481e-15	PC3	E2F8	2.12083e-10	Yes
0.408551	0.316482	0.492995	2.85254e-15	PC3	KIF20A	2.12414e-10	Yes
0.408319	0.316232	0.492784	2.96729e-15	PC3	TRIP13	2.20959e-10	Yes
0.408181	0.316082	0.492658	3.03794e-15	PC3	GJD3	2.2622e-10	Yes
0.408077	0.31597	0.492564	3.09176e-15	PC3	TAP2	2.30228e-10	Yes
0.407502	0.315349	0.492041	3.40865e-15	PC3	BACH1	2.53825e-10	Yes
0.407416	0.315256	0.491963	3.45908e-15	PC3	GINS4	2.57581e-10	Yes
0.407288	0.315118	0.491847	3.53468e-15	PC3	FLRT2	2.6321e-10	Yes
0.407215	0.315039	0.49178	3.57855e-15	PC3	PPAPDC1A	2.66477e-10	Yes
0.407181	0.315002	0.491749	3.59935e-15	PC3	PLXDC2	2.68026e-10	Yes
0.407008	0.314816	0.491593	3.70604e-15	PC3	FAM72B	2.7597e-10	Yes
0.406926	0.314727	0.491517	3.7582e-15	PC3	DCBLD2	2.79854e-10	Yes
0.406859	0.314655	0.491457	3.80055e-15	PC3	MSC	2.83008e-10	Yes
0.406755	0.314543	0.491363	3.86797e-15	PC3	RALGPS2	2.88029e-10	Yes
0.406579	0.314352	0.491202	3.98521e-15	PC3	APOL6	2.96759e-10	Yes
0.406373	0.31413	0.491015	4.12611e-15	PC3	GAL3ST4	3.07251e-10	Yes
0.406286	0.314036	0.490936	4.18741e-15	PC3	PKP2	3.11816e-10	Yes
0.405889	0.313607	0.490575	4.47755e-15	PC3	PXDN	3.33421e-10	Yes
0.405857	0.313573	0.490546	4.50119e-15	PC3	CHSY1	3.35181e-10	Yes
0.591815	0.518523	0.656475	6.92217e-34	PC4	MED13L	5.15459e-29	Yes
0.543779	0.464761	0.614204	7.29912e-28	PC4	C12orf51	5.43529e-23	Yes
0.528746	0.448056	0.600892	3.59824e-26	PC4	TET1	2.67943e-21	Yes
0.525944	0.444948	0.598405	7.28514e-26	PC4	SOCS7	5.42488e-21	Yes
0.52332	0.44204	0.596076	1.40168e-25	PC4	CHD7	1.04376e-20	Yes
0.521533	0.44006	0.59449	2.18172e-25	PC4	MLL2	1.62462e-20	Yes
0.518528	0.436733	0.59182	4.5649e-25	PC4	KIAA1549	3.39925e-20	Yes
0.514551	0.432333	0.588284	1.19909e-24	PC4	ZNF37A	8.92905e-20	Yes
0.509207	0.426426	0.583529	4.30373e-24	PC4	BPTF	3.20478e-19	Yes
0.508998	0.426196	0.583343	4.52214e-24	PC4	CHD6	3.36741e-19	Yes
0.507234	0.424248	0.581772	6.85885e-24	PC4	POGZ	5.10745e-19	Yes
0.505607	0.422451	0.580322	1.00528e-23	PC4	UBN2	7.48582e-19	Yes
0.504629	0.421372	0.57945	1.2636e-23	PC4	ACVR2B	9.40936e-19	Yes
0.502321	0.418826	0.577393	2.16134e-23	PC4	ZNF236	1.60944e-18	Yes
0.498538	0.414656	0.574019	5.1646e-23	PC4	IRGQ	3.84582e-18	Yes
0.497773	0.413813	0.573336	6.15201e-23	PC4	ZFHX3	4.5811e-18	Yes
0.491027	0.406386	0.567313	2.82112e-22	PC4	ATAD2B	2.10075e-17	Yes
0.488056	0.403118	0.564656	5.45958e-22	PC4	N4BP2	4.06548e-17	Yes
0.484604	0.399325	0.561569	1.16619e-21	PC4	TAF1L	8.68401e-17	Yes
0.483668	0.398297	0.560732	1.43035e-21	PC4	USP34	1.06511e-16	Yes
0.482346	0.396845	0.559548	1.90709e-21	PC4	RGPD3	1.42011e-16	Yes
0.480086	0.394364	0.557524	3.10862e-21	PC4	RAD54L2	2.31483e-16	Yes
0.477521	0.39155	0.555227	5.38885e-21	PC4	RANBP2	4.01281e-16	Yes
0.476659	0.390605	0.554454	6.47613e-21	PC4	KIAA0182	4.82245e-16	Yes
0.474976	0.38876	0.552946	9.25949e-21	PC4	ASH1L	6.89508e-16	Yes
0.474857	0.38863	0.552839	9.49512e-21	PC4	ZNF445	7.07054e-16	Yes
0.474601	0.388349	0.55261	1.00235e-20	PC4	TPR	7.46403e-16	Yes
0.473894	0.387574	0.551976	1.16392e-20	PC4	EP400	8.66712e-16	Yes
0.473316	0.386941	0.551458	1.31473e-20	PC4	HIC2	9.79016e-16	Yes
0.4724	0.385937	0.550635	1.59434e-20	PC4	GOLGA4	1.18722e-15	Yes
0.472047	0.38555	0.550319	1.71686e-20	PC4	SYNE2	1.27846e-15	Yes
0.471773	0.38525	0.550073	1.81835e-20	PC4	C1orf95	1.35403e-15	Yes
0.471238	0.384664	0.549593	2.03409e-20	PC4	TET3	1.51468e-15	Yes
0.470795	0.384179	0.549196	2.23126e-20	PC4	SETD5	1.66151e-15	Yes
0.469828	0.383121	0.548329	2.72981e-20	PC4	PNN	2.03275e-15	Yes
0.468315	0.381464	0.54697	3.73809e-20	PC4	LCOR	2.78357e-15	Yes
0.467563	0.380641	0.546295	4.36761e-20	PC4	ROCK2	3.25234e-15	Yes
0.466244	0.379198	0.545111	5.73355e-20	PC4	NEB	4.26949e-15	Yes
0.465273	0.378135	0.544238	7.00018e-20	PC4	KIF21A	5.21269e-15	Yes
0.46404	0.376787	0.543131	9.01025e-20	PC4	BCOR	6.70948e-15	Yes
0.463645	0.376355	0.542776	9.7678e-20	PC4	RAP1GAP2	7.27359e-15	Yes
0.46183	0.374371	0.541145	1.41303e-19	PC4	ZSCAN29	1.05221e-14	Yes
0.461571	0.374088	0.540912	1.48938e-19	PC4	MLL3	1.10907e-14	Yes
0.461194	0.373676	0.540573	1.60756e-19	PC4	MDN1	1.19707e-14	Yes
0.460416	0.372826	0.539874	1.88128e-19	PC4	MGA	1.4009e-14	Yes
0.458574	0.370814	0.538217	2.726e-19	PC4	CRIPAK	2.02992e-14	Yes
0.457781	0.369947	0.537503	3.19595e-19	PC4	C17orf68	2.37987e-14	Yes
0.456879	0.368963	0.536692	3.82707e-19	PC4	HECTD1	2.84983e-14	Yes
0.456841	0.368921	0.536658	3.85628e-19	PC4	GOLGA3	2.87158e-14	Yes
0.456576	0.368632	0.53642	4.06545e-19	PC4	SLC22A23	3.02733e-14	Yes
0.456214	0.368237	0.536094	4.36963e-19	PC4	AKAP9	3.25384e-14	Yes
0.455599	0.367566	0.535541	4.9382e-19	PC4	BIRC6	3.67723e-14	Yes
0.454471	0.366334	0.534525	6.17736e-19	PC4	ZNF192	4.59997e-14	Yes
0.453787	0.365588	0.533909	7.07219e-19	PC4	KSR1	5.2663e-14	Yes
0.452653	0.364352	0.532888	8.84398e-19	PC4	FAM168B	6.58567e-14	Yes
0.452523	0.364209	0.532771	9.07434e-19	PC4	PHF8	6.75721e-14	Yes
0.452096	0.363743	0.532386	9.86954e-19	PC4	HUWE1	7.34935e-14	Yes
0.449966	0.361421	0.530467	1.49764e-18	PC4	RALGAPA2	1.11522e-13	Yes
0.44942	0.360826	0.529975	1.66586e-18	PC4	MYST4	1.24048e-13	Yes
0.448687	0.360027	0.529315	1.92125e-18	PC4	TUG1	1.43066e-13	Yes
0.447942	0.359215	0.528643	2.22004e-18	PC4	BAT2L2	1.65315e-13	Yes
0.447878	0.359146	0.528586	2.24756e-18	PC4	ZNF514	1.67364e-13	Yes
0.446868	0.358046	0.527676	2.73246e-18	PC4	CHML	2.03472e-13	Yes
0.446752	0.357919	0.52757	2.79467e-18	PC4	ALMS1	2.08105e-13	Yes
0.44646	0.357601	0.527308	2.95623e-18	PC4	ZNF638	2.20136e-13	Yes
0.445879	0.356968	0.526784	3.30647e-18	PC4	NINL	2.46217e-13	Yes
0.445735	0.356811	0.526654	3.39975e-18	PC4	ANKRD26	2.53163e-13	Yes
0.445224	0.356255	0.526193	3.75068e-18	PC4	DHX33	2.79294e-13	Yes
0.444449	0.355411	0.525494	4.35211e-18	PC4	DCAF16	3.2408e-13	Yes
0.4443	0.355249	0.52536	4.47762e-18	PC4	YLPM1	3.33426e-13	Yes
0.444032	0.354957	0.525118	4.71317e-18	PC4	MBTD1	3.50966e-13	Yes
0.443981	0.354901	0.525072	4.7599e-18	PC4	HERC2	3.54446e-13	Yes
0.443692	0.354587	0.524811	5.03011e-18	PC4	OTUD7B	3.74567e-13	Yes
0.443555	0.354438	0.524688	5.16339e-18	PC4	NIPBL	3.84492e-13	Yes
0.443524	0.354404	0.524659	5.19451e-18	PC4	GPT2	3.86809e-13	Yes
0.443432	0.354304	0.524576	5.28651e-18	PC4	PFAS	3.9366e-13	Yes
0.443186	0.354036	0.524355	5.54032e-18	PC4	RALGAPA1	4.1256e-13	Yes
0.442367	0.353145	0.523616	6.47577e-18	PC4	RREB1	4.82218e-13	Yes
0.441847	0.352579	0.523146	7.14957e-18	PC4	MCM3APAS	5.32393e-13	Yes
0.441633	0.352346	0.522953	7.44621e-18	PC4	PCNT	5.54482e-13	Yes
0.441331	0.352018	0.522681	7.88474e-18	PC4	UBE2Q2P1	5.87137e-13	Yes
0.43999	0.350559	0.52147	1.01622e-17	PC4	ZNF594	7.56728e-13	Yes
0.439935	0.350499	0.52142	1.02685e-17	PC4	CHD3	7.64646e-13	Yes
0.439456	0.349977	0.520987	1.12402e-17	PC4	ZBTB39	8.37003e-13	Yes
0.439257	0.349762	0.520808	1.16686e-17	PC4	NCOA6	8.68905e-13	Yes
0.438704	0.34916	0.520308	1.29497e-17	PC4	C20orf117	9.64298e-13	Yes
0.437361	0.3477	0.519095	1.66594e-17	PC4	CMTM4	1.24054e-12	Yes
0.437158	0.347479	0.518912	1.73046e-17	PC4	ARID1A	1.28859e-12	Yes
0.436316	0.346564	0.518151	2.02528e-17	PC4	CIT	1.50813e-12	Yes
0.435377	0.345544	0.517303	2.41218e-17	PC4	RBM12B	1.79623e-12	Yes
0.435364	0.345529	0.517291	2.41812e-17	PC4	NBEAL1	1.80065e-12	Yes
0.435	0.345134	0.516962	2.5872e-17	PC4	ZNF318	1.92656e-12	Yes
0.434766	0.34488	0.516751	2.70203e-17	PC4	LRP6	2.01207e-12	Yes
0.432931	0.342887	0.515092	3.79404e-17	PC4	KIAA1109	2.82524e-12	Yes
0.432348	0.342254	0.514565	4.22444e-17	PC4	ATXN2	3.14573e-12	Yes
0.432153	0.342042	0.514388	4.37917e-17	PC4	KIAA2018	3.26095e-12	Yes
0.432069	0.341951	0.514313	4.44732e-17	PC4	MAGI1	3.31169e-12	Yes
0.431708	0.341558	0.513986	4.75273e-17	PC4	BOD1L	3.53912e-12	Yes
0.431499	0.341331	0.513797	4.93884e-17	PC4	INSR	3.6777e-12	Yes
0.43148	0.341311	0.51378	4.95588e-17	PC4	SCN8A	3.6904e-12	Yes
0.430308	0.340039	0.51272	6.14289e-17	PC4	KIAA1958	4.5743e-12	Yes
0.430203	0.339925	0.512624	6.26219e-17	PC4	ZNF618	4.66314e-12	Yes
0.429964	0.339666	0.512409	6.54076e-17	PC4	CBFA2T2	4.87058e-12	Yes
0.429676	0.339354	0.512148	6.89389e-17	PC4	MDC1	5.13353e-12	Yes
0.429428	0.339084	0.511923	7.21401e-17	PC4	PLEKHM3	5.37191e-12	Yes
0.429071	0.338697	0.511601	7.69796e-17	PC4	ZNF37B	5.73228e-12	Yes
0.428969	0.338585	0.511508	7.84318e-17	PC4	ENO3	5.84043e-12	Yes
0.428532	0.338112	0.511113	8.49088e-17	PC4	ANKRD52	6.32273e-12	Yes
0.427849	0.337371	0.510495	9.61325e-17	PC4	ZNF407	7.15851e-12	Yes
0.427768	0.337283	0.510421	9.75521e-17	PC4	UHRF1BP1	7.26422e-12	Yes
0.427225	0.336694	0.50993	1.07641e-16	PC4	ATG2B	8.01549e-12	Yes
0.426815	0.33625	0.509559	1.15913e-16	PC4	ATP7B	8.63148e-12	Yes
0.425764	0.33511	0.508607	1.40125e-16	PC4	CELF3	1.04344e-11	Yes
0.42564	0.334976	0.508495	1.43279e-16	PC4	BRWD3	1.06692e-11	Yes
0.425266	0.33457	0.508156	1.53265e-16	PC4	ZNF33A	1.14129e-11	Yes
0.425209	0.334507	0.508104	1.54859e-16	PC4	UBR5	1.15316e-11	Yes
0.425093	0.334383	0.508	1.58097e-16	PC4	CSPP1	1.17727e-11	Yes
0.423222	0.332355	0.506305	2.21069e-16	PC4	SLTM	1.64619e-11	Yes
0.423153	0.33228	0.506243	2.23815e-16	PC4	INO80D	1.66664e-11	Yes
0.422345	0.331404	0.50551	2.5851e-16	PC4	C9orf45	1.92499e-11	Yes
0.42202	0.331052	0.505216	2.7389e-16	PC4	CHD8	2.03952e-11	Yes
0.42194	0.330965	0.505143	2.7784e-16	PC4	ZC3H11A	2.06893e-11	Yes
0.421882	0.330902	0.505091	2.80708e-16	PC4	BCL9	2.09029e-11	Yes
0.421339	0.330314	0.504599	3.09151e-16	PC4	COL25A1	2.30209e-11	Yes
0.421327	0.330301	0.504588	3.09826e-16	PC4	BTAF1	2.30712e-11	Yes
0.420715	0.329639	0.504034	3.45293e-16	PC4	UGGT1	2.57122e-11	Yes
0.420629	0.329545	0.503955	3.50604e-16	PC4	POLR3A	2.61077e-11	Yes
0.420364	0.329258	0.503715	3.67443e-16	PC4	RNF169	2.73617e-11	Yes
0.42027	0.329156	0.50363	3.7363e-16	PC4	POLR2A	2.78224e-11	Yes
0.420214	0.329096	0.503579	3.77338e-16	PC4	CHD2	2.80985e-11	Yes
0.420028	0.328894	0.50341	3.89966e-16	PC4	SRRM2	2.90388e-11	Yes
0.419725	0.328566	0.503136	4.11413e-16	PC4	TAOK1	3.06359e-11	Yes
0.419337	0.328147	0.502785	4.40494e-16	PC4	NKTR	3.28014e-11	Yes
0.418369	0.327098	0.501906	5.22405e-16	PC4	FOXJ3	3.89009e-11	Yes
0.418041	0.326743	0.501609	5.53343e-16	PC4	MYSM1	4.12047e-11	Yes
0.417922	0.326614	0.501501	5.65031e-16	PC4	44626	4.2075e-11	Yes
0.417811	0.326494	0.5014	5.76193e-16	PC4	UNC13B	4.29062e-11	Yes
0.416732	0.325326	0.500422	6.95997e-16	PC4	MLL	5.18274e-11	Yes
0.416165	0.324713	0.499907	7.68429e-16	PC4	MED12	5.72211e-11	Yes
0.415975	0.324508	0.499735	7.94236e-16	PC4	DNMT3A	5.91428e-11	Yes
0.415152	0.323618	0.498989	9.16615e-16	PC4	C13orf23	6.82557e-11	Yes
0.415133	0.323597	0.498971	9.19707e-16	PC4	RERE	6.8486e-11	Yes
0.415053	0.32351	0.498899	9.32591e-16	PC4	PCM1	6.94454e-11	Yes
0.41491	0.323356	0.498769	9.56043e-16	PC4	GOLGA6L5	7.11918e-11	Yes
0.414781	0.323216	0.498652	9.77752e-16	PC4	BEND3	7.28083e-11	Yes
0.414503	0.322915	0.4984	1.02602e-15	PC4	NAV2	7.64025e-11	Yes
0.414437	0.322843	0.498339	1.03796e-15	PC4	SPEN	7.72919e-11	Yes
0.413769	0.322121	0.497733	1.16534e-15	PC4	PRKDC	8.67768e-11	Yes
0.413704	0.322051	0.497674	1.17848e-15	PC4	KIAA1244	8.77557e-11	Yes
0.413622	0.321962	0.497599	1.19534e-15	PC4	ZNF81	8.9011e-11	Yes
0.413503	0.321833	0.497492	1.22018e-15	PC4	SOS1	9.08605e-11	Yes
0.412795	0.321069	0.496849	1.37875e-15	PC4	ZNF397	1.02669e-10	Yes
0.412778	0.32105	0.496834	1.38287e-15	PC4	PHF3	1.02976e-10	Yes
0.412676	0.32094	0.496741	1.40737e-15	PC4	TACC2	1.048e-10	Yes
0.412652	0.320914	0.496719	1.41326e-15	PC4	C22orf30	1.05238e-10	Yes
0.411665	0.319847	0.495823	1.67492e-15	PC4	CCNJ	1.24723e-10	Yes
0.410676	0.318777	0.494925	1.98491e-15	PC4	SORL1	1.47806e-10	Yes
0.410107	0.318163	0.494408	2.18779e-15	PC4	ZNF587	1.62914e-10	Yes
0.40992	0.31796	0.494238	2.25902e-15	PC4	SLC7A2	1.68218e-10	Yes
0.409891	0.317929	0.494212	2.27018e-15	PC4	SETD2	1.69049e-10	Yes
0.408807	0.316759	0.493228	2.7308e-15	PC4	TNRC6B	2.03349e-10	Yes
0.408743	0.316689	0.493169	2.76112e-15	PC4	BAZ2A	2.05607e-10	Yes
0.408553	0.316484	0.492996	2.85177e-15	PC4	UPF2	2.12357e-10	Yes
0.408371	0.316287	0.492831	2.94133e-15	PC4	ZBTB40	2.19026e-10	Yes
0.408248	0.316155	0.492719	3.00335e-15	PC4	FLVCR1	2.23644e-10	Yes
0.408179	0.31608	0.492657	3.03879e-15	PC4	UBR4	2.26284e-10	Yes
0.408096	0.31599	0.492581	3.08208e-15	PC4	TTC28	2.29507e-10	Yes
0.407848	0.315722	0.492355	3.21465e-15	PC4	MED1	2.39379e-10	Yes
0.407269	0.315098	0.49183	3.54591e-15	PC4	VPS13A	2.64046e-10	Yes
0.407207	0.315031	0.491773	3.58332e-15	PC4	ODZ1	2.66832e-10	Yes
0.407092	0.314906	0.491668	3.65404e-15	PC4	NCOR1	2.72098e-10	Yes
0.406917	0.314718	0.49151	3.76354e-15	PC4	UTP20	2.80252e-10	Yes
0.406503	0.314271	0.491134	4.03618e-15	PC4	MEGF8	3.00554e-10	Yes
0.406487	0.314254	0.491119	4.04719e-15	PC4	SMG1	3.01374e-10	Yes
0.406191	0.313933	0.490849	4.25501e-15	PC4	PAXIP1	3.16849e-10	Yes
0.406059	0.313791	0.49073	4.35057e-15	PC4	FASN	3.23965e-10	Yes
0.405916	0.313637	0.4906	4.4566e-15	PC4	DPY19L3	3.3186e-10	Yes
0.405885	0.313604	0.490572	4.47995e-15	PC4	RBBP6	3.336e-10	Yes
0.405853	0.313568	0.490542	4.50471e-15	PC4	NBPF10	3.35443e-10	Yes
0.405306	0.312978	0.490045	4.93942e-15	PC4	BAT2L1	3.67814e-10	Yes
0.405047	0.312699	0.48981	5.15885e-15	PC4	MCF2L	3.84154e-10	Yes
0.404901	0.312541	0.489677	5.28702e-15	PC4	HCFC1	3.93698e-10	Yes
0.404422	0.312024	0.489241	5.73021e-15	PC4	HEATR5B	4.267e-10	Yes
0.404307	0.3119	0.489137	5.84135e-15	PC4	GOLGA6L10	4.34976e-10	Yes
0.404018	0.311588	0.488874	6.13119e-15	PC4	SNRNP200	4.56559e-10	Yes
0.403507	0.311037	0.48841	6.67829e-15	PC4	GON4L	4.97299e-10	Yes
0.403431	0.310955	0.48834	6.7639e-15	PC4	TRRAP	5.03674e-10	Yes
0.402727	0.310196	0.4877	7.60775e-15	PC4	KDM6B	5.66511e-10	Yes
0.402688	0.310154	0.487664	7.65754e-15	PC4	NR2C2	5.70219e-10	Yes
0.402485	0.309935	0.48748	7.92088e-15	PC4	GIGYF2	5.89828e-10	Yes
0.402442	0.309888	0.48744	7.97848e-15	PC4	TP53BP1	5.94117e-10	Yes
0.402277	0.309709	0.48729	8.20129e-15	PC4	ZNF652	6.10709e-10	Yes
0.402246	0.309676	0.487262	8.24358e-15	PC4	HOOK1	6.13858e-10	Yes
0.401675	0.309061	0.486743	9.06419e-15	PC4	ANKRD12	6.74965e-10	Yes
0.401328	0.308686	0.486427	9.60289e-15	PC4	PHF17	7.15079e-10	Yes
0.401111	0.308453	0.486229	9.95426e-15	PC4	SGK196	7.41244e-10	Yes
0.400861	0.308183	0.486002	1.03756e-14	PC4	CEP250	7.72618e-10	Yes
0.400763	0.308077	0.485913	1.05453e-14	PC4	ESF1	7.85255e-10	Yes
0.39997	0.307222	0.485191	1.20243e-14	PC4	PBRM1	8.95392e-10	Yes
0.398874	0.30604	0.484193	1.44082e-14	PC4	SNORD116_4	1.0729e-09	Yes
0.398783	0.305942	0.48411	1.46256e-14	PC4	ATRN	1.08909e-09	Yes
0.398546	0.305687	0.483894	1.52069e-14	PC4	CEP290	1.13238e-09	Yes
0.39819	0.305303	0.48357	1.61238e-14	PC4	SS18L1	1.20066e-09	Yes
0.397813	0.304898	0.483228	1.71508e-14	PC4	C17orf85	1.27714e-09	Yes
0.397788	0.30487	0.483204	1.72226e-14	PC4	NF1	1.28248e-09	Yes
0.397518	0.304579	0.482958	1.80029e-14	PC4	TTC3	1.34059e-09	Yes
0.397304	0.304349	0.482763	1.86454e-14	PC4	SBNO1	1.38843e-09	Yes
0.396264	0.303229	0.481817	2.20985e-14	PC4	NSD1	1.64556e-09	Yes
0.39577	0.302696	0.481366	2.39543e-14	PC4	ZNF609	1.78375e-09	Yes
0.395457	0.302359	0.481081	2.52075e-14	PC4	ZC3HAV1L	1.87708e-09	Yes
0.395324	0.302216	0.48096	2.57575e-14	PC4	ZNF696	1.91803e-09	Yes
0.395284	0.302173	0.480924	2.59255e-14	PC4	ZNF620	1.93054e-09	Yes
0.394806	0.301658	0.480488	2.80194e-14	PC4	SUV420H1	2.08647e-09	Yes
0.394709	0.301554	0.4804	2.84649e-14	PC4	GATAD2B	2.11964e-09	Yes
0.394651	0.301491	0.480347	2.87344e-14	PC4	VPS13B	2.13971e-09	Yes
0.394444	0.301268	0.480158	2.97173e-14	PC4	RGPD4	2.2129e-09	Yes
0.394061	0.300856	0.479809	3.16196e-14	PC4	KIDINS220	2.35456e-09	Yes
0.393841	0.30062	0.479609	3.27637e-14	PC4	TAF1	2.43975e-09	Yes
0.393622	0.300384	0.47941	3.39459e-14	PC4	LRBA	2.52778e-09	Yes
0.392972	0.299684	0.478817	3.77073e-14	PC4	PDCD11	2.80788e-09	Yes
0.392638	0.299324	0.478512	3.97967e-14	PC4	LOC100190940	2.96346e-09	Yes
0.392381	0.299047	0.478278	4.14786e-14	PC4	DLG5	3.08871e-09	Yes
0.392193	0.298845	0.478106	4.27555e-14	PC4	RSF1	3.18379e-09	Yes
0.391831	0.298455	0.477776	4.53196e-14	PC4	TNRC6A	3.37472e-09	Yes
0.391177	0.297752	0.477181	5.03307e-14	PC4	ZNF664	3.74787e-09	Yes
0.39104	0.297604	0.477055	5.14539e-14	PC4	KIF3A	3.83151e-09	Yes
0.390846	0.297395	0.476878	5.308e-14	PC4	SHANK2	3.9526e-09	Yes
0.390843	0.297393	0.476876	5.31007e-14	PC4	NFAT5	3.95415e-09	Yes
0.390258	0.296763	0.476342	5.83147e-14	PC4	ZZEF1	4.34241e-09	Yes
0.390161	0.296659	0.476254	5.92273e-14	PC4	C10orf137	4.41036e-09	Yes
0.390103	0.296596	0.476201	5.97804e-14	PC4	LOC646762	4.45155e-09	Yes
0.389998	0.296484	0.476106	6.07873e-14	PC4	SRRM5	4.52653e-09	Yes
0.389786	0.296256	0.475912	6.28828e-14	PC4	CECR2	4.68257e-09	Yes
0.389708	0.296171	0.475841	6.36731e-14	PC4	SUDS3	4.74142e-09	Yes
0.38936	0.295797	0.475523	6.73052e-14	PC4	CELF1	5.01188e-09	Yes
0.389355	0.295792	0.475519	6.73589e-14	PC4	CLASP1	5.01588e-09	Yes
0.389236	0.295663	0.47541	6.86567e-14	PC4	CROCCL2	5.11252e-09	Yes
0.389093	0.295509	0.475279	7.0239e-14	PC4	DICER1	5.23035e-09	Yes
0.38907	0.295485	0.475259	7.04932e-14	PC4	SMARCA1	5.24928e-09	Yes
0.38872	0.295109	0.47494	7.45259e-14	PC4	ZCCHC2	5.54957e-09	Yes
0.388587	0.294966	0.474819	7.61179e-14	PC4	ZRANB1	5.66812e-09	Yes
0.388289	0.294646	0.474546	7.9812e-14	PC4	TRPV1	5.9432e-09	Yes
0.387936	0.294266	0.474224	8.44126e-14	PC4	TMEM131	6.28578e-09	Yes
0.387749	0.294065	0.474054	8.69528e-14	PC4	DOCK1	6.47494e-09	Yes
0.387644	0.293952	0.473958	8.84107e-14	PC4	EP300	6.5835e-09	Yes
0.387512	0.29381	0.473838	9.02797e-14	PC4	ACIN1	6.72268e-09	Yes
0.387214	0.293489	0.473565	9.4656e-14	PC4	HEATR5A	7.04856e-09	Yes
0.386913	0.293166	0.473291	9.92607e-14	PC4	ARHGAP39	7.39145e-09	Yes
0.386828	0.293075	0.473214	1.006e-13	PC4	SNORD116_28	7.4912e-09	Yes
0.386645	0.292878	0.473046	1.03556e-13	PC4	C2CD3	7.71129e-09	Yes
0.386499	0.292721	0.472913	1.05974e-13	PC4	MIA3	7.89134e-09	Yes
0.386218	0.292419	0.472657	1.10775e-13	PC4	LRP4	8.24889e-09	Yes
0.385897	0.292074	0.472363	1.16537e-13	PC4	ZNF84	8.67792e-09	Yes
0.385622	0.291778	0.472112	1.21694e-13	PC4	TFCP2L1	9.06196e-09	Yes
0.385566	0.291719	0.472062	1.22759e-13	PC4	GOLGA2B	9.14127e-09	Yes
0.385303	0.291435	0.471821	1.27961e-13	PC4	PLEKHG2	9.52863e-09	Yes
0.385198	0.291322	0.471725	1.30089e-13	PC4	DIP2A	9.68709e-09	Yes
0.384891	0.290993	0.471445	1.36501e-13	PC4	RGPD6	1.01645e-08	Yes
0.384736	0.290826	0.471303	1.39871e-13	PC4	GRAMD4	1.04155e-08	Yes
0.384682	0.290768	0.471254	1.41071e-13	PC4	TCF20	1.05048e-08	Yes
0.384674	0.29076	0.471247	1.41231e-13	PC4	ZNF146	1.05167e-08	Yes
0.384315	0.290374	0.470919	1.49419e-13	PC4	PIKFYVE	1.11265e-08	Yes
0.384176	0.290224	0.470792	1.52717e-13	PC4	WNK2	1.13721e-08	Yes
0.384057	0.290097	0.470683	1.55581e-13	PC4	KIAA0232	1.15854e-08	Yes
0.383327	0.289313	0.470017	1.744e-13	PC4	ZNF605	1.29867e-08	Yes
0.383271	0.289253	0.469966	1.75922e-13	PC4	CCAR1	1.31e-08	Yes
0.383116	0.289086	0.469824	1.8024e-13	PC4	NCRNA00201	1.34216e-08	Yes
0.383091	0.289059	0.469801	1.8094e-13	PC4	BMP6	1.34737e-08	Yes
0.382365	0.288279	0.469138	2.02634e-13	PC4	ELK4	1.50891e-08	Yes
0.382222	0.288126	0.469008	2.07177e-13	PC4	FNBP1L	1.54274e-08	Yes
0.381861	0.287738	0.468677	2.1916e-13	PC4	C11orf30	1.63198e-08	Yes
0.380871	0.286675	0.467773	2.55534e-13	PC4	SYT7	1.90283e-08	Yes
0.380545	0.286325	0.467476	2.68748e-13	PC4	GOLGB1	2.00124e-08	Yes
0.380345	0.28611	0.467292	2.7721e-13	PC4	KIAA1804	2.06425e-08	Yes
0.380323	0.286087	0.467272	2.78143e-13	PC4	PTPN11	2.07119e-08	Yes
0.380094	0.285841	0.467063	2.88176e-13	PC4	BDP1	2.14591e-08	Yes
0.379922	0.285657	0.466906	2.95909e-13	PC4	KIT	2.20348e-08	Yes
0.379243	0.284928	0.466286	3.28576e-13	PC4	ANKRD17	2.44674e-08	Yes
0.379232	0.284916	0.466275	3.29143e-13	PC4	IFT81	2.45096e-08	Yes
0.378926	0.284588	0.465996	3.45021e-13	PC4	ZNF518A	2.5692e-08	Yes
0.378898	0.284557	0.46597	3.4653e-13	PC4	TRIP11	2.58044e-08	Yes
0.378806	0.284459	0.465886	3.51462e-13	PC4	ATP2A2	2.61716e-08	Yes
0.378787	0.284438	0.465868	3.52499e-13	PC4	IGF1R	2.62489e-08	Yes
0.378599	0.284237	0.465697	3.62808e-13	PC4	MYST3	2.70165e-08	Yes
0.378365	0.283986	0.465483	3.761e-13	PC4	DSTYK	2.80063e-08	Yes
0.378284	0.283899	0.465409	3.80787e-13	PC4	MYO10	2.83553e-08	Yes
0.377914	0.283502	0.465071	4.03016e-13	PC4	BAZ2B	3.00106e-08	Yes
0.377569	0.283132	0.464755	4.24915e-13	PC4	ZNF281	3.16413e-08	Yes
0.377455	0.28301	0.464651	4.32376e-13	PC4	RIF1	3.21969e-08	Yes
0.377444	0.282997	0.464641	4.33143e-13	PC4	MAVS	3.2254e-08	Yes
0.377434	0.282986	0.464631	4.33824e-13	PC4	ENTPD4	3.23047e-08	Yes
0.377256	0.282796	0.464469	4.45746e-13	PC4	CDON	3.31925e-08	Yes
0.376641	0.282136	0.463906	4.89703e-13	PC4	ATP11A	3.64657e-08	Yes
0.376631	0.282126	0.463898	4.90415e-13	PC4	ZMYM2	3.65187e-08	Yes
0.376496	0.28198	0.463774	5.00683e-13	PC4	MYEF2	3.72834e-08	Yes
0.376183	0.281645	0.463487	5.25149e-13	PC4	PRDM10	3.91052e-08	Yes
0.376103	0.281559	0.463414	5.31583e-13	PC4	CELSR2	3.95843e-08	Yes
0.376052	0.281505	0.463368	5.35692e-13	PC4	KLHL11	3.98903e-08	Yes
0.375938	0.281382	0.463264	5.45105e-13	PC4	MOBKL1A	4.05913e-08	Yes
0.375751	0.281182	0.463092	5.60872e-13	PC4	AHCTF1	4.17653e-08	Yes
0.37544	0.280849	0.462808	5.87987e-13	PC4	ZNF704	4.37845e-08	Yes
0.375244	0.280638	0.462629	6.05799e-13	PC4	KIAA1530	4.51108e-08	Yes
0.374825	0.280189	0.462245	6.45619e-13	PC4	CALCA	4.8076e-08	Yes
0.374295	0.27962	0.46176	6.99638e-13	PC4	FAM84A	5.20986e-08	Yes
0.373927	0.279226	0.461424	7.39642e-13	PC4	ASXL2	5.50775e-08	Yes
0.373812	0.279103	0.461318	7.52679e-13	PC4	ALS2	5.60482e-08	Yes
0.373797	0.279086	0.461304	7.54391e-13	PC4	ERO1LB	5.61757e-08	Yes
0.373762	0.279049	0.461273	7.58359e-13	PC4	CACNA1D	5.64712e-08	Yes
0.373482	0.278749	0.461016	7.9115e-13	PC4	GLTSCR1	5.8913e-08	Yes
0.373024	0.278259	0.460598	8.47684e-13	PC4	TAF4	6.31228e-08	Yes
0.372912	0.278138	0.460495	8.62166e-13	PC4	PLAGL2	6.42012e-08	Yes
0.372895	0.27812	0.460479	8.64373e-13	PC4	NBEA	6.43656e-08	Yes
0.372784	0.278001	0.460378	8.78925e-13	PC4	KIF3B	6.54491e-08	Yes
0.372758	0.277973	0.460354	8.8244e-13	PC4	MDM4	6.57109e-08	Yes
0.372665	0.277874	0.460269	8.94795e-13	PC4	PRDM15	6.66309e-08	Yes
0.372361	0.277548	0.459991	9.36715e-13	PC4	SNX27	6.97525e-08	Yes
0.372242	0.277421	0.459882	9.53626e-13	PC4	RBM33	7.10118e-08	Yes
0.372186	0.27736	0.45983	9.61733e-13	PC4	KIAA0467	7.16154e-08	Yes
0.371825	0.276973	0.4595	1.01537e-12	PC4	GYG2	7.56092e-08	Yes
0.371695	0.276835	0.459381	1.03525e-12	PC4	PLCB1	7.70896e-08	Yes
0.371349	0.276464	0.459064	1.09047e-12	PC4	CENPJ	8.1202e-08	Yes
0.371335	0.276448	0.459051	1.09283e-12	PC4	GRLF1	8.13772e-08	Yes
0.371213	0.276318	0.45894	1.11288e-12	PC4	TBL1X	8.28705e-08	Yes
0.371069	0.276164	0.458808	1.13719e-12	PC4	TBC1D8	8.46812e-08	Yes
0.37066	0.275725	0.458433	1.20899e-12	PC4	LMTK2	9.00273e-08	Yes
0.370576	0.275636	0.458357	1.22423e-12	PC4	BCORL1	9.11626e-08	Yes
0.370314	0.275356	0.458117	1.27304e-12	PC4	TOP2B	9.47969e-08	Yes
0.369719	0.274717	0.457571	1.3914e-12	PC4	FNBP4	1.03611e-07	Yes
0.369562	0.27455	0.457428	1.42422e-12	PC4	ZKSCAN1	1.06054e-07	Yes
0.369312	0.274282	0.457199	1.4783e-12	PC4	ATP8B1	1.10082e-07	Yes
0.36906	0.274013	0.456969	1.53468e-12	PC4	SMAD9	1.1428e-07	Yes
0.368762	0.273693	0.456696	1.60418e-12	PC4	AGXT2L1	1.19456e-07	Yes
0.368741	0.273671	0.456676	1.60926e-12	PC4	MSI2	1.19833e-07	Yes
0.36872	0.273648	0.456657	1.61438e-12	PC4	NEURL4	1.20215e-07	Yes
0.368691	0.273617	0.456631	1.6212e-12	PC4	RBM6	1.20722e-07	Yes
0.368627	0.273549	0.456572	1.63677e-12	PC4	ZC3H13	1.21882e-07	Yes
0.368242	0.273136	0.456219	1.73306e-12	PC4	GPATCH8	1.29053e-07	Yes
0.367786	0.272648	0.455801	1.85415e-12	PC4	ICK	1.38069e-07	Yes
0.367733	0.272592	0.455753	1.86874e-12	PC4	KIF1B	1.39156e-07	Yes
0.367664	0.272518	0.45569	1.88785e-12	PC4	DOCK5	1.40579e-07	Yes
0.367545	0.27239	0.45558	1.9215e-12	PC4	CLCN6	1.43085e-07	Yes
0.366927	0.271728	0.455014	2.1054e-12	PC4	ZFC3H1	1.56778e-07	Yes
0.366881	0.271679	0.454972	2.11968e-12	PC4	SEC16A	1.57842e-07	Yes
0.366449	0.271217	0.454576	2.25915e-12	PC4	SIRT1	1.68228e-07	Yes
0.366406	0.271171	0.454537	2.27343e-12	PC4	ACACA	1.69291e-07	Yes
0.366171	0.27092	0.454321	2.35346e-12	PC4	ZNF782	1.75251e-07	Yes
0.366128	0.270873	0.454282	2.36852e-12	PC4	OTUD3	1.76372e-07	Yes
0.366065	0.270806	0.454224	2.39062e-12	PC4	ARHGEF12	1.78018e-07	Yes
0.365885	0.270614	0.454059	2.45469e-12	PC4	ATRX	1.82789e-07	Yes
0.365496	0.270198	0.453703	2.59898e-12	PC4	MYO9A	1.93533e-07	Yes
0.365309	0.269998	0.453531	2.67143e-12	PC4	UBR3	1.98928e-07	Yes
0.364979	0.269645	0.453229	2.80392e-12	PC4	SDCCAG1	2.08794e-07	Yes
0.364654	0.269297	0.452931	2.94078e-12	PC4	GPR98	2.18985e-07	Yes
0.364231	0.268844	0.452543	3.12852e-12	PC4	FAM59A	2.32965e-07	Yes
0.364094	0.268698	0.452417	3.19187e-12	PC4	BMS1P4	2.37683e-07	Yes
0.364019	0.268617	0.452348	3.22722e-12	PC4	ZKSCAN2	2.40315e-07	Yes
0.36393	0.268522	0.452267	3.26958e-12	PC4	SMC5	2.43469e-07	Yes
0.363564	0.26813	0.451931	3.44908e-12	PC4	TSC1	2.56836e-07	Yes
0.36352	0.268084	0.451891	3.47102e-12	PC4	PAIP2B	2.5847e-07	Yes
0.363313	0.267862	0.451701	3.57745e-12	PC4	KIAA0528	2.66394e-07	Yes
0.363258	0.267803	0.45165	3.60641e-12	PC4	MFSD9	2.68551e-07	Yes
0.363155	0.267694	0.451557	3.66062e-12	PC4	FAM190B	2.72588e-07	Yes
0.362642	0.267145	0.451086	3.94461e-12	PC4	SLC14A2	2.93736e-07	Yes
0.362301	0.26678	0.450773	4.14528e-12	PC4	KIAA0947	3.08678e-07	Yes
0.362178	0.266649	0.45066	4.21981e-12	PC4	EYS	3.14228e-07	Yes
0.362024	0.266484	0.450519	4.31547e-12	PC4	SLC45A4	3.21352e-07	Yes
0.361989	0.266447	0.450487	4.33722e-12	PC4	GCN1L1	3.22971e-07	Yes
0.361948	0.266403	0.450449	4.36314e-12	PC4	ARNT	3.24901e-07	Yes
0.361928	0.266381	0.450431	4.37597e-12	PC4	ZNF623	3.25856e-07	Yes
0.361614	0.266046	0.450143	4.57942e-12	PC4	C6orf176	3.41006e-07	Yes
0.361487	0.26591	0.450026	4.66466e-12	PC4	EIF3A	3.47354e-07	Yes
0.361272	0.26568	0.449829	4.81195e-12	PC4	ZFYVE9	3.58322e-07	Yes
0.361228	0.265633	0.449789	4.8427e-12	PC4	SMARCC1	3.60612e-07	Yes
0.361202	0.265605	0.449765	4.8611e-12	PC4	CELSR1	3.61982e-07	Yes
0.361124	0.265522	0.449694	4.91606e-12	PC4	LRRC37A4	3.66074e-07	Yes
0.361051	0.265444	0.449627	4.96825e-12	PC4	ZNF142	3.69961e-07	Yes
0.360973	0.26536	0.449554	5.02526e-12	PC4	PAN2	3.74206e-07	Yes
0.3609	0.265282	0.449488	5.07838e-12	PC4	ZNF592	3.78162e-07	Yes
0.360896	0.265279	0.449485	5.08095e-12	PC4	PIK3C2A	3.78353e-07	Yes
0.360826	0.265203	0.44942	5.13297e-12	PC4	KIAA1731	3.82227e-07	Yes
0.360763	0.265136	0.449362	5.17998e-12	PC4	USP24	3.85727e-07	Yes
0.360444	0.264795	0.44907	5.42386e-12	PC4	MAML3	4.03888e-07	Yes
0.360343	0.264687	0.448977	5.50387e-12	PC4	GXYLT1	4.09846e-07	Yes
0.360163	0.264495	0.448812	5.64851e-12	PC4	SUPT6H	4.20617e-07	Yes
0.360085	0.264412	0.44874	5.71208e-12	PC4	RPRD2	4.2535e-07	Yes
0.36005	0.264374	0.448708	5.74152e-12	PC4	POLE	4.27542e-07	Yes
0.360032	0.264355	0.448692	5.75578e-12	PC4	HERC1	4.28604e-07	Yes
0.359696	0.263996	0.448384	6.0412e-12	PC4	PPRC1	4.49858e-07	Yes
0.3595	0.263786	0.448203	6.21477e-12	PC4	ANKS1A	4.62783e-07	Yes
0.359402	0.263681	0.448113	6.30279e-12	PC4	INPPL1	4.69338e-07	Yes
0.359099	0.263358	0.447836	6.58286e-12	PC4	CKAP5	4.90193e-07	Yes
0.35895	0.263199	0.447699	6.72545e-12	PC4	IDE	5.0081e-07	Yes
0.358907	0.263153	0.447659	6.76699e-12	PC4	ZCCHC11	5.03904e-07	Yes
0.358753	0.262988	0.447518	6.91862e-12	PC4	CAD	5.15195e-07	Yes
0.358585	0.262808	0.447363	7.08772e-12	PC4	MED13	5.27787e-07	Yes
0.35829	0.262494	0.447093	7.39337e-12	PC4	C6orf134	5.50547e-07	Yes
0.358195	0.262392	0.447005	7.49471e-12	PC4	RNASEN	5.58094e-07	Yes
0.358009	0.262194	0.446835	7.69673e-12	PC4	PCSK1	5.73137e-07	Yes
0.357769	0.261937	0.446615	7.96548e-12	PC4	ERC1	5.93149e-07	Yes
0.357726	0.261891	0.446575	8.01472e-12	PC4	HELZ	5.96816e-07	Yes
0.357648	0.261808	0.446504	8.10443e-12	PC4	KCNJ11	6.03496e-07	Yes
0.357186	0.261314	0.446079	8.65807e-12	PC4	ZDHHC23	6.44723e-07	Yes
0.356833	0.260938	0.445755	9.10446e-12	PC4	WDR35	6.77964e-07	Yes
0.356514	0.260597	0.445462	9.52724e-12	PC4	JMY	7.09446e-07	Yes
0.356235	0.260299	0.445206	9.91354e-12	PC4	MTMR7	7.38212e-07	Yes
0.35621	0.260272	0.445183	9.94893e-12	PC4	USP47	7.40847e-07	Yes
0.356184	0.260244	0.445159	9.9862e-12	PC4	NCOA2	7.43623e-07	Yes
0.35583	0.259866	0.444834	1.05015e-11	PC4	ARFGEF2	7.81995e-07	Yes
0.355697	0.259725	0.444712	1.07012e-11	PC4	SIK2	7.96866e-07	Yes
0.355462	0.259474	0.444496	1.10636e-11	PC4	USP22	8.23853e-07	Yes
0.355308	0.259309	0.444355	1.13081e-11	PC4	SMG7	8.42061e-07	Yes
0.355208	0.259202	0.444262	1.14705e-11	PC4	GNL3L	8.54149e-07	Yes
0.355203	0.259197	0.444258	1.14777e-11	PC4	MIB1	8.54684e-07	Yes
0.355	0.25898	0.444071	1.18136e-11	PC4	FLJ42627	8.79696e-07	Yes
0.354946	0.258923	0.444022	1.19036e-11	PC4	ASXL1	8.86401e-07	Yes
0.354403	0.258344	0.443524	1.28531e-11	PC4	FBXO21	9.57107e-07	Yes
0.354341	0.258277	0.443466	1.29672e-11	PC4	MSI1	9.65605e-07	Yes
0.354319	0.258254	0.443446	1.30067e-11	PC4	SETBP1	9.68545e-07	Yes
0.353672	0.257563	0.442852	1.42506e-11	PC4	JARID2	1.06117e-06	Yes
0.353614	0.257501	0.442799	1.43673e-11	PC4	ANAPC1	1.06986e-06	Yes
0.353576	0.25746	0.442763	1.44454e-11	PC4	FBRSL1	1.07568e-06	Yes
0.353291	0.257157	0.442502	1.50356e-11	PC4	CEP350	1.11963e-06	Yes
0.353194	0.257053	0.442413	1.52426e-11	PC4	HMGB3	1.13504e-06	Yes
0.35319	0.257048	0.442409	1.52523e-11	PC4	ZNF507	1.13576e-06	Yes
0.352862	0.256699	0.442108	1.59709e-11	PC4	SETD1B	1.18927e-06	Yes
0.352705	0.256531	0.441963	1.63291e-11	PC4	PER2	1.21594e-06	Yes
0.352631	0.256452	0.441895	1.64985e-11	PC4	PANK1	1.22856e-06	Yes
0.35256	0.256376	0.44183	1.66645e-11	PC4	DYNC1H1	1.24092e-06	Yes
0.352257	0.256053	0.441551	1.73874e-11	PC4	AGAP1	1.29475e-06	Yes
0.352225	0.256019	0.441522	1.74669e-11	PC4	SMC3	1.30067e-06	Yes
0.352205	0.255998	0.441503	1.75156e-11	PC4	PAPOLA	1.3043e-06	Yes
0.352085	0.25587	0.441393	1.78126e-11	PC4	CEP152	1.32641e-06	Yes
0.351795	0.255561	0.441127	1.85497e-11	PC4	KIAA0240	1.38131e-06	Yes
0.35169	0.255448	0.44103	1.88266e-11	PC4	NAA25	1.40192e-06	Yes
0.351334	0.255069	0.440703	1.97868e-11	PC4	NFRKB	1.47342e-06	Yes
0.351229	0.254956	0.440606	2.00804e-11	PC4	WHSC1	1.49529e-06	Yes
0.351202	0.254928	0.440581	2.01565e-11	PC4	PHIP	1.50095e-06	Yes
0.351177	0.254901	0.440558	2.02262e-11	PC4	LOC100271836	1.50615e-06	Yes
0.35115	0.254873	0.440534	2.03022e-11	PC4	NCOA1	1.5118e-06	Yes
0.350945	0.254654	0.440345	2.0892e-11	PC4	HAL	1.55572e-06	Yes
0.350772	0.25447	0.440187	2.14013e-11	PC4	MFHAS1	1.59364e-06	Yes
0.350764	0.254461	0.440179	2.14265e-11	PC4	ZNF326	1.59553e-06	Yes
0.35075	0.254446	0.440166	2.1467e-11	PC4	NUP153	1.59854e-06	Yes
0.350663	0.254353	0.440086	2.17302e-11	PC4	MLXIP	1.61814e-06	Yes
0.35054	0.254222	0.439973	2.21072e-11	PC4	INADL	1.64621e-06	Yes
0.350502	0.254181	0.439938	2.2225e-11	PC4	GOLGA2	1.65498e-06	Yes
0.350434	0.254109	0.439875	2.24363e-11	PC4	COBLL1	1.67072e-06	Yes
0.350002	0.253648	0.439478	2.38262e-11	PC4	VPS13D	1.77422e-06	Yes
0.349652	0.253275	0.439156	2.50161e-11	PC4	NAV1	1.86283e-06	Yes
0.349268	0.252865	0.438803	2.63858e-11	PC4	ARFGEF1	1.96482e-06	Yes
0.349018	0.252599	0.438574	2.73159e-11	PC4	ZNF343	2.03408e-06	Yes
0.348919	0.252493	0.438482	2.76941e-11	PC4	RC3H1	2.06224e-06	Yes
0.348427	0.251969	0.43803	2.96466e-11	PC4	RAPGEF2	2.20764e-06	Yes
0.3484	0.251941	0.438005	2.97556e-11	PC4	BARX1	2.21575e-06	Yes
0.348357	0.251895	0.437966	2.9934e-11	PC4	TNKS	2.22903e-06	Yes
0.348332	0.251868	0.437943	3.00374e-11	PC4	TMPPE	2.23674e-06	Yes
0.348099	0.251619	0.437728	3.10232e-11	PC4	TRIO	2.31014e-06	Yes
0.347754	0.251251	0.43741	3.25386e-11	PC4	DDX46	2.42298e-06	Yes
0.347079	0.250532	0.436789	3.57123e-11	PC4	SLC16A14	2.65932e-06	Yes
0.346603	0.250025	0.436352	3.81287e-11	PC4	VPRBP	2.83925e-06	Yes
0.346564	0.249984	0.436316	3.83301e-11	PC4	ATAD5	2.85425e-06	Yes
0.346548	0.249966	0.436301	3.8419e-11	PC4	AGAP5	2.86087e-06	Yes
0.34644	0.249852	0.436202	3.89883e-11	PC4	GBF1	2.90327e-06	Yes
0.346366	0.249773	0.436134	3.93868e-11	PC4	NUMA1	2.93294e-06	Yes
0.346199	0.249595	0.43598	4.03007e-11	PC4	ARID2	3.00099e-06	Yes
0.34582	0.249191	0.435632	4.24522e-11	PC4	BTBD7	3.1612e-06	Yes
0.34571	0.249074	0.435531	4.30962e-11	PC4	GOLGA6L9	3.20916e-06	Yes
0.345652	0.249012	0.435477	4.34431e-11	PC4	IPW	3.23499e-06	Yes
0.345624	0.248982	0.435451	4.36114e-11	PC4	KDM5B	3.24752e-06	Yes
0.345494	0.248844	0.435332	4.43916e-11	PC4	LAMA5	3.30562e-06	Yes
0.345377	0.248719	0.435223	4.51119e-11	PC4	BMS1	3.35926e-06	Yes
0.345315	0.248653	0.435166	4.54954e-11	PC4	ARHGEF11	3.38781e-06	Yes
0.345256	0.248591	0.435113	4.58612e-11	PC4	FGL1	3.41506e-06	Yes
0.344941	0.248255	0.434822	4.78834e-11	PC4	PPARGC1A	3.56564e-06	Yes
0.344447	0.247729	0.434368	5.12229e-11	PC4	SPIN3	3.81431e-06	Yes
0.344419	0.247699	0.434342	5.14199e-11	PC4	FZD5	3.82899e-06	Yes
0.344356	0.247632	0.434284	5.18606e-11	PC4	HIPK2	3.8618e-06	Yes
0.344291	0.247562	0.434224	5.2327e-11	PC4	LOC145837	3.89653e-06	Yes
0.343817	0.247058	0.433788	5.58157e-11	PC4	FAM193A	4.15632e-06	Yes
0.343799	0.247038	0.433771	5.59534e-11	PC4	BAT2	4.16657e-06	Yes
0.343753	0.246989	0.433728	5.63066e-11	PC4	TRIM33	4.19287e-06	Yes
0.343447	0.246664	0.433447	5.86961e-11	PC4	IKZF4	4.37081e-06	Yes
0.342658	0.245824	0.43272	6.53333e-11	PC4	HNRNPUL2	4.86505e-06	Yes
0.342497	0.245653	0.432572	6.6773e-11	PC4	ARHGAP32	4.97225e-06	Yes
0.342333	0.245478	0.432421	6.8274e-11	PC4	MARK1	5.08402e-06	Yes
0.342008	0.245132	0.432122	7.13415e-11	PC4	TULP4	5.31244e-06	Yes
0.341802	0.244912	0.431932	7.33612e-11	PC4	MAN1A2	5.46284e-06	Yes
0.341769	0.244877	0.431901	7.36913e-11	PC4	FAM98B	5.48742e-06	Yes
0.341426	0.244512	0.431586	7.71802e-11	PC4	LARP1	5.74722e-06	Yes
0.341309	0.244387	0.431478	7.84138e-11	PC4	HSP90B1	5.83908e-06	Yes
0.341175	0.244246	0.431355	7.9836e-11	PC4	MTOR	5.94499e-06	Yes
0.341156	0.244225	0.431337	8.00485e-11	PC4	DDX42	5.96081e-06	Yes
0.341	0.244059	0.431193	8.17498e-11	PC4	RBM25	6.0875e-06	Yes
0.340791	0.243837	0.431001	8.40743e-11	PC4	DNAJC27	6.2606e-06	Yes
0.340395	0.243415	0.430636	8.8687e-11	PC4	SGSM1	6.60407e-06	Yes
0.340113	0.243115	0.430376	9.21071e-11	PC4	MYCN	6.85875e-06	Yes
0.339911	0.2429	0.43019	9.46456e-11	PC4	BRD3	7.04779e-06	Yes
0.339849	0.242834	0.430133	9.54318e-11	PC4	ZNF621	7.10633e-06	Yes
[truncated: 502 more rows]

[truncated: 3 more sheets: supplementary file 1k, supplementary file 1l, supplementary file 1m]
